# Supplementary material for: Charting the interactome of PDE3A in human cells using an IBMX based chemical proteomics approach
Source: Royal Society of Chemistry journal article supplement (doi:10.1039/c5mb00142k), 2015-07-17
Supplement: c5mb00142k3.xlsx [file c5mb00142k3.xlsx]

## Sheet: Legend
Supplemental table 2A : Proteins quantified in the pull downs performed with IBMX resin in presence of the specific inhibitors cilostamide and papaverine
Supplemental table 2B: Proteins identified after co-immunoprecipitation of PDE3A in presence or absence of cilostamide
L= light (control)
M= medium (+cilostamide)
H= heavy (+papaverine)

## Sheet: Supplemental Table 2A
Accession	Description	MW [kDa]	ΣCoverage	Σ# Proteins	Σ# Unique Peptides	Σ# Peptides	Σ# PSMs	Bio1: Area	Bio2: Area	Bio1: H/L (papaverine/control)	Normalized log( Bio1 H/L (papaverine/control))	Bio1: H/L (papaverine/control) Count	Bio2: H/L (papaverine/control)	Normalized log(Bio2 H/L (papaverine/control))	Bio2: H/L (papaverine/control) Count	Bio1: M/L (cilostamide/control)	Normalized log(Bio1 M/L (cilostamide/control))	Bio1: M/L (cilostamide/control) Count	Bio2: M/L (cilostamide/control)	Normalized log(Bio2 M/L (cilostamide/control))	Bio2: M/L (cilostamide/control) Count
Q14123	Calcium/calmodulin-dependent 3',5'-cyclic nucleotide phosphodiesterase 1C OS=Homo sapiens GN=PDE1C PE=1 SV=1 - [PDE1C_HUMAN]	80.7102	4.65	2	1	3	38	3.31536e+08	3.99196e+08			3	1	0.018878
P02533	Keratin, type I cytoskeletal 14 OS=Homo sapiens GN=KRT14 PE=1 SV=4 - [K1C14_HUMAN]	51.5294	49.15	6	6	26	200	1.02637e+09	9.45914e+09	0.598366	-1.1599	10	1	0.018878	11	0.480431	-1.54096	9	100	5.98119	13
P08779	Keratin, type I cytoskeletal 16 OS=Homo sapiens GN=KRT16 PE=1 SV=4 - [K1C16_HUMAN]	51.2362	46.51	6	11	23	177	1.02637e+09	9.45914e+09	0.985373	-0.440257	2	1	0.018878	18	0.142696	-3.29235	2	100	5.98119	18
P04259	Keratin, type II cytoskeletal 6B OS=Homo sapiens GN=KRT6B PE=1 SV=5 - [K2C6B_HUMAN]	60.0303	47.87	9	3	30	220	1.35555e+09	8.45719e+09	1.3899	0.0559793	1	1	0.018878	1	0.01	-7.12722	1	100	5.98119	1
P02538	Keratin, type II cytoskeletal 6A OS=Homo sapiens GN=KRT6A PE=1 SV=3 - [K2C6A_HUMAN]	60.0083	47.87	9	3	31	218	7.59322e+08	8.45719e+09	1.96536	0.555793	2	1	0.018878	5				100	5.98119	6
O43395	U4/U6 small nuclear ribonucleoprotein Prp3 OS=Homo sapiens GN=PRPF3 PE=1 SV=2 - [PRPF3_HUMAN]	77.4809	1.02	1	1	1	2	6.5773e+06	3.84492e+06				1	0.018878	1				100	5.98119	1
P41229	Lysine-specific demethylase 5C OS=Homo sapiens GN=KDM5C PE=1 SV=2 - [KDM5C_HUMAN]	175.609	0.83	1	1	1	1	0	20164668				1	0.018878	1				100	5.98119	1
P05109	Protein S100-A8 OS=Homo sapiens GN=S100A8 PE=1 SV=1 - [S10A8_HUMAN]	10.8276	38.71	1	4	4	16	6.775e+07	3.39489e+08	0.512689	-1.38284	6	1.02531	0.0549342	4	0.0256231	-5.76977	5	51.4035	5.02113	4
Q04695	Keratin, type I cytoskeletal 17 OS=Homo sapiens GN=KRT17 PE=1 SV=2 - [K1C17_HUMAN]	48.076	47.45	5	11	24	150	8.89624e+08	8.51523e+09	1.01766	-0.393739	8	1	0.018878	13	0.574557	-1.28284	7	50.1222	4.98472	18
Q9Y4C2	Protein FAM115A OS=Homo sapiens GN=FAM115A PE=1 SV=3 - [F115A_HUMAN]	102.061	2.82	1	3	3	5	6.07738e+06	6.0482e+06				11.2937	3.51632	4				21.4296	3.75887	4
P13647	Keratin, type II cytoskeletal 5 OS=Homo sapiens GN=KRT5 PE=1 SV=3 - [K2C5_HUMAN]	62.34	35.25	7	15	26	182	5.33877e+08	7.9429e+09	0.62104	-1.10624	16	1.14624	0.21579	23	0.60407	-1.21058	18	18.4064	3.53948	24
Q16539	Mitogen-activated protein kinase 14 OS=Homo sapiens GN=MAPK14 PE=1 SV=3 - [MK14_HUMAN]	41.267	2.22	1	1	1	2	0	2.82936e+06				12.5152	3.66449	1				17.7124	3.48403	1
P41240	Tyrosine-protein kinase CSK OS=Homo sapiens GN=CSK PE=1 SV=1 - [CSK_HUMAN]	50.6717	9.11	1	4	4	14	1.52072e+07	3.05604e+07	1.53113	0.195596	4	10.4099	3.39876	3	1.85121	0.405101	4	14.6173	3.20694	3
Q14166	Tubulin--tyrosine ligase-like protein 12 OS=Homo sapiens GN=TTLL12 PE=1 SV=2 - [TTL12_HUMAN]	74.356	1.86	1	1	1	3	0	3.83237e+06				1.00396	0.0245786	2				13.584	3.10117	2
Q15637	Splicing factor 1 OS=Homo sapiens GN=SF1 PE=1 SV=4 - [SF01_HUMAN]	68.2859	2.19	1	1	1	1	0	31307006				1.50661	0.610185	1				12.2105	2.94739	1
Q9Y316	Protein MEMO1 OS=Homo sapiens GN=MEMO1 PE=1 SV=1 - [MEMO1_HUMAN]	33.7115	6.73	1	2	2	9	6.09468e+07	5.04564e+07	1.49967	0.165645	4	4.45505	2.17432	1	1.92552	0.461885	4	12.1344	2.93837	1
Q86X55	Histone-arginine methyltransferase CARM1 OS=Homo sapiens GN=CARM1 PE=1 SV=3 - [CARM1_HUMAN]	65.8114	4.28	1	3	3	7	2.48078e+07	1.46612e+07	0.627134	-1.09215	3	0.90054	-0.132259	2	1.61977	0.212421	3	11.8338	2.90218	2
P40763	Signal transducer and activator of transcription 3 OS=Homo sapiens GN=STAT3 PE=1 SV=2 - [STAT3_HUMAN]	88.0114	8.44	1	5	5	6	2.64215e+07	22598232	1.24485	-0.103027	3	7.54863	2.93509	1	1.07421	-0.380091	3	11.733	2.88984	1
P06733	Alpha-enolase OS=Homo sapiens GN=ENO1 PE=1 SV=2 - [ENOA_HUMAN]	47.1393	14.98	1	6	6	12	4.52344e+07	3.82908e+07	2.33481	0.804307	5	8.28285	3.06901	3	1.08101	-0.370985	5	11.678	2.88305	2
P18085	ADP-ribosylation factor 4 OS=Homo sapiens GN=ARF4 PE=1 SV=3 - [ARF4_HUMAN]	20.4977	11.67	4	2	2	5	2.46954e+07	3.28326e+07	0.867007	-0.624884	1	8.70762	3.14116	1	0.940637	-0.571654	1	11.5408	2.86601	1
P10398	Serine/threonine-protein kinase A-Raf OS=Homo sapiens GN=ARAF PE=1 SV=2 - [ARAF_HUMAN]	67.5423	5.12	3	3	3	4	8.43292e+06	9.58831e+06				0.754929	-0.386709	2				10.3978	2.71555	2
Q9Y3I0	tRNA-splicing ligase RtcB homolog OS=Homo sapiens GN=RTCB PE=1 SV=1 - [RTCB_HUMAN]	55.1749	9.11	1	4	4	6	9.35963e+06	5.45433e+06	0.238333	-2.48795	1	1.02267	0.05122	2	1.17197	-0.254425	1	10.3189	2.70456	2
P14923	Junction plakoglobin OS=Homo sapiens GN=JUP PE=1 SV=3 - [PLAK_HUMAN]	81.6927	4.56	1	3	3	7	8.70549e+06	3.25146e+07	0.527969	-1.34047	1	1	0.018878	3	0.605226	-1.20782	2	9.81913	2.63293	3
Q92734	Protein TFG OS=Homo sapiens GN=TFG PE=1 SV=2 - [TFG_HUMAN]	43.4212	2.5	1	1	1	4	5.77098e+07	3.86978e+07	1.86112	0.477172	1	6.55711	2.73194	2	1.42105	0.0235973	1	9.67604	2.61176	2
P61160	Actin-related protein 2 OS=Homo sapiens GN=ACTR2 PE=1 SV=1 - [ARP2_HUMAN]	44.7322	3.05	1	1	1	7	1.28571e+07	2.46722e+07	1.82392	0.448042	2	2.33571	1.24274	2	1.81455	0.376244	2	9.01853	2.51023	2
Q7L1Q6	Basic leucine zipper and W2 domain-containing protein 1 OS=Homo sapiens GN=BZW1 PE=1 SV=1 - [BZW1_HUMAN]	48.0127	10.74	2	5	5	6	1.66485e+07	4.3274e+06	1.29285	-0.0484495	1	4.14811	2.07133	1	1.62564	0.21764	1	8.83597	2.48073	1
Q9BZY9	E3 ubiquitin-protein ligase TRIM31 OS=Homo sapiens GN=TRIM31 PE=1 SV=2 - [TRI31_HUMAN]	48.2133	5.65	1	2	2	5	1.42694e+07	4.28572e+07	2.23388	0.740551	1	1.86512	0.918148	3	3.02634	1.11421	1	7.27308	2.19991	3
P04083	Annexin A1 OS=Homo sapiens GN=ANXA1 PE=1 SV=2 - [ANXA1_HUMAN]	38.69	8.09	1	3	3	11	8.77509e+06	1.37886e+07	2.09809	0.65008	2	1.30933	0.40771	1	2.55842	0.871888	2	6.82652	2.10849	1
Q6UWP8	Suprabasin OS=Homo sapiens GN=SBSN PE=2 SV=2 - [SBSN_HUMAN]	60.5046	15.25	1	2	2	6	1.72375e+06	2.95642e+06	0.427111	-1.64632	2	0.922457	-0.0975679	1	0.826751	-0.757839	2	6.80167	2.10323	2
Q08554	Desmocollin-1 OS=Homo sapiens GN=DSC1 PE=1 SV=2 - [DSC1_HUMAN]	99.9238	3.13	1	2	2	8	1.25364e+07	3.55533e+07	0.540737	-1.306	3				1.16544	-0.262484	3	6.08253	1.94201	1
P35221	Catenin alpha-1 OS=Homo sapiens GN=CTNNA1 PE=1 SV=1 - [CTNA1_HUMAN]	100.009	2.76	1	2	2	3	3.76129e+06	1.20253e+07	1.26426	-0.0807019	1	1.35345	0.455522	1				5.96158	1.91303	1
Q86U90	YrdC domain-containing protein, mitochondrial OS=Homo sapiens GN=YRDC PE=1 SV=1 - [YRDC_HUMAN]	29.3093	10.75	1	2	2	12	3.30268e+07	1.83932e+07	1.57568	0.236977	3	3.9292	1.99312	2	1.4977	0.099381	3	5.56138	1.81278	2
Q13885	Tubulin beta-2A chain OS=Homo sapiens GN=TUBB2A PE=1 SV=1 - [TBB2A_HUMAN]	49.875	24.49	5	1	9	126	3.51546e+08	6.1939e+08				2.30615	1.22437	1				5.38681	1.76677	1
O60488	Long-chain-fatty-acid--CoA ligase 4 OS=Homo sapiens GN=ACSL4 PE=1 SV=2 - [ACSL4_HUMAN]	79.1367	1.13	1	1	1	1	0	18277778				4.26774	2.11235	1				5.31932	1.74858	1
Q02878	60S ribosomal protein L6 OS=Homo sapiens GN=RPL6 PE=1 SV=3 - [RL6_HUMAN]	32.7076	2.78	1	1	1	6	11540955	12844575	1.07327	-0.31698	1							5.19161	1.71352	1
O95861	3'(2'),5'-bisphosphate nucleotidase 1 OS=Homo sapiens GN=BPNT1 PE=1 SV=1 - [BPNT1_HUMAN]	33.3712	6.17	1	2	2	12	2.88369e+07	43514946	1.64431	0.298481	2	3.27693	1.73122	2	1.61155	0.205089	2	4.67587	1.56257	2
P29353	SHC-transforming protein 1 OS=Homo sapiens GN=SHC1 PE=1 SV=4 - [SHC1_HUMAN]	62.7825	1.72	1	1	1	4	1.13849e+07	6.4497e+06	1.54037	0.204282	2	1.56471	0.664776	1	1.84348	0.399066	2	4.54354	1.52116	1
P50991	T-complex protein 1 subunit delta OS=Homo sapiens GN=CCT4 PE=1 SV=4 - [TCPD_HUMAN]	57.8878	9.28	1	5	5	6	1.55916e+07	1.18807e+07	1.08255	-0.304562	1	2.50855	1.34573	1	1.18642	-0.236746	1	4.2501	1.42484	1
Q06124	Tyrosine-protein phosphatase non-receptor type 11 OS=Homo sapiens GN=PTPN11 PE=1 SV=2 - [PTN11_HUMAN]	68.3933	2.85	1	2	2	3	1.12304e+07	7.67894e+06	2.47219	0.88679	1	1.97548	1.00108	1	1.76118	0.333182	2	4.08096	1.36625	1
O00507	Probable ubiquitin carboxyl-terminal hydrolase FAF-Y OS=Homo sapiens GN=USP9Y PE=1 SV=2 - [USP9Y_HUMAN]	290.891	0.35	2	1	1	1	0	1.50992e+06				3.44966	1.80533	1				3.6855	1.2192	1
P15170	Eukaryotic peptide chain release factor GTP-binding subunit ERF3A OS=Homo sapiens GN=GSPT1 PE=1 SV=1 - [ERF3A_HUMAN]	55.7203	7.41	2	4	4	13	2.48709e+07	5.44565e+07	0.268435	-2.31636	1	2.13429	1.11263	2	0.244073	-2.51798	1	3.68109	1.21747	2
Q9Y314	Nitric oxide synthase-interacting protein OS=Homo sapiens GN=NOSIP PE=1 SV=1 - [NOSIP_HUMAN]	33.151	19.93	1	4	4	10	4.24324e+07	4.98163e+06	0.611278	-1.1291	4	2.26969	1.20137	2	0.804925	-0.796438	4	3.67055	1.21334	2
P40925	Malate dehydrogenase, cytoplasmic OS=Homo sapiens GN=MDH1 PE=1 SV=4 - [MDHC_HUMAN]	36.403	13.17	1	4	4	10	2.23056e+07	22588887	1.08365	-0.303103	3	2.76396	1.48562	1	1.07483	-0.379259	3	3.64039	1.20143	1
O95336	6-phosphogluconolactonase OS=Homo sapiens GN=PGLS PE=1 SV=2 - [6PGL_HUMAN]	27.5296	4.26	1	1	1	12	18526312	22597609	2.61603	0.968377	1	2.20509	1.15972	2	3.17779	1.18466	1	3.6186	1.19277	2
P07195	L-lactate dehydrogenase B chain OS=Homo sapiens GN=LDHB PE=1 SV=2 - [LDHB_HUMAN]	36.6151	11.98	1	4	4	16	3.40545e+07	6.61057e+07	2.29368	0.778665	5	4.94491	2.32482	4	1.79846	0.363396	5	3.60854	1.18875	4
Q13085	Acetyl-CoA carboxylase 1 OS=Homo sapiens GN=ACACA PE=1 SV=2 - [ACACA_HUMAN]	265.385	0.9	1	2	2	2	0	1.27617e+07				1.78872	0.857802	2				3.55767	1.16827	2
Q96EN8	Molybdenum cofactor sulfurase OS=Homo sapiens GN=MOCOS PE=1 SV=2 - [MOCOS_HUMAN]	98.0579	2.59	1	2	2	6	1.16333e+07	1.5444e+07				1.7605	0.834866	1				3.53174	1.15772	1
Q99962	Endophilin-A1 OS=Homo sapiens GN=SH3GL2 PE=1 SV=1 - [SH3G2_HUMAN]	39.9371	3.41	2	1	1	3	7880986	6.21785e+06	3.39019	1.34237	1	2.40642	1.28577	2	3.93309	1.4923	1	3.45297	1.12518	2
Q15437	Protein transport protein Sec23B OS=Homo sapiens GN=SEC23B PE=1 SV=2 - [SC23B_HUMAN]	86.4235	1.43	1	1	1	2	0	6.85333e+06				3.28686	1.73559	1				3.35418	1.0833	1
P07900	Heat shock protein HSP 90-alpha OS=Homo sapiens GN=HSP90AA1 PE=1 SV=5 - [HS90A_HUMAN]	84.6067	15.98	5	6	11	34	4.63617e+07	5.53059e+07	2.04224	0.611152	5	3.31606	1.74835	3	1.84355	0.399124	5	3.27331	1.04809	2
P25788	Proteasome subunit alpha type-3 OS=Homo sapiens GN=PSMA3 PE=1 SV=2 - [PSA3_HUMAN]	28.4151	4.71	1	1	1	1	0	3.09607e+06				2.40357	1.28405	1				3.26405	1.044	1
Q5T440	Putative transferase CAF17, mitochondrial OS=Homo sapiens GN=IBA57 PE=1 SV=1 - [CAF17_HUMAN]	38.1311	15.45	1	5	5	18	8.00906e+07	4.59453e+07	1.32857	-0.00911998	6	1.25892	0.351066	6	1.73068	0.307978	6	3.22777	1.02787	6
P04406	Glyceraldehyde-3-phosphate dehydrogenase OS=Homo sapiens GN=GAPDH PE=1 SV=3 - [G3P_HUMAN]	36.0304	8.06	1	2	2	17	1.50269e+08	2.13947e+08	3.05142	1.19048	6	1.96325	0.992123	3	2.67403	0.935653	6	3.19769	1.01437	3
O75223	Gamma-glutamylcyclotransferase OS=Homo sapiens GN=GGCT PE=1 SV=1 - [GGCT_HUMAN]	20.9943	12.23	1	2	2	9	2.07911e+07	3.7923e+07	0.518661	-1.36614	2	0.854621	-0.207765	3	1.07181	-0.383321	2	3.12586	0.981591	2
P15924	Desmoplakin OS=Homo sapiens GN=DSP PE=1 SV=3 - [DESP_HUMAN]	331.569	8.5	1	26	26	95	4.03374e+07	9.86509e+07	0.871944	-0.616692	22	1.02157	0.0496641	20	1.10087	-0.34472	21	3.11027	0.974377	22
Q9UPU5	Ubiquitin carboxyl-terminal hydrolase 24 OS=Homo sapiens GN=USP24 PE=1 SV=3 - [UBP24_HUMAN]	294.178	0.95	1	2	2	5	6583823	5.93547e+06				6.22856	2.65778	1				3.0996	0.969421	1
Q96EP5	DAZ-associated protein 1 OS=Homo sapiens GN=DAZAP1 PE=1 SV=1 - [DAZP1_HUMAN]	43.3561	3.69	1	1	1	4	5.57668e+06	5.30071e+06	4.11119	1.62056	1	1.238	0.326887	1	4.24045	1.60085	1	3.05456	0.948303	1
Q14247	Src substrate cortactin OS=Homo sapiens GN=CTTN PE=1 SV=2 - [SRC8_HUMAN]	61.5485	15.64	1	7	7	41	8.67968e+07	1.27476e+08	1.70022	0.34672	8	1.00012	0.0190581	12	2.04811	0.550929	8	3.02098	0.932354	13
O14757	Serine/threonine-protein kinase Chk1 OS=Homo sapiens GN=CHEK1 PE=1 SV=2 - [CHK1_HUMAN]	54.3989	6.93	1	3	3	7	2.51772e+07	3.3983e+07				2.35473	1.25444	4				2.93749	0.891922	4
Q8IYS1	Peptidase M20 domain-containing protein 2 OS=Homo sapiens GN=PM20D2 PE=1 SV=2 - [P20D2_HUMAN]	47.746	1.61	1	1	1	5	2.04966e+07	26816627				1.11402	0.174653	1				2.9361	0.891241	1
P37802	Transgelin-2 OS=Homo sapiens GN=TAGLN2 PE=1 SV=3 - [TAGL2_HUMAN]	22.3772	28.64	2	5	5	11	2.03237e+07	1.80847e+07	0.456441	-1.5505	2	0.846507	-0.221528	4	0.981559	-0.510217	2	2.92194	0.884265	4
O43175	D-3-phosphoglycerate dehydrogenase OS=Homo sapiens GN=PHGDH PE=1 SV=4 - [SERA_HUMAN]	56.6144	11.26	1	5	5	24	1.59417e+07	2.03507e+07	2.69427	1.01089	3	1.92626	0.964684	5	3.00284	1.10296	3	2.91603	0.881346	4
Q9BRP1	Programmed cell death protein 2-like OS=Homo sapiens GN=PDCD2L PE=1 SV=1 - [PDD2L_HUMAN]	39.3912	7.26	1	2	2	11	4.27517e+07	1.29133e+08				1.8127	0.87702	1				2.87373	0.860263	1
O60942	mRNA-capping enzyme OS=Homo sapiens GN=RNGTT PE=1 SV=1 - [MCE1_HUMAN]	68.5126	1.68	1	1	1	15	4.94425e+06	6.8316e+06	1.83584	0.45744	2	1.14984	0.220306	2	1.59508	0.190263	2	2.84166	0.844073	2
Q96FZ2	Embryonic stem cell-specific 5-hydroxymethylcytosine-binding protein OS=Homo sapiens GN=HMCES PE=1 SV=1 - [HMCES_HUMAN]	40.5492	6.5	1	2	2	6	1.93648e+07	3.49892e+07				1.46573	0.570497	1				2.83369	0.840018	2
P35579	Myosin-9 OS=Homo sapiens GN=MYH9 PE=1 SV=4 - [MYH9_HUMAN]	226.392	0.97	1	2	2	2	8.95412e+06	7.57769e+06	1.1628	-0.201402	1	4.08983	2.05092	1	1.44062	0.0433213	1	2.79306	0.819185	1
P49005	DNA polymerase delta subunit 2 OS=Homo sapiens GN=POLD2 PE=1 SV=1 - [DPOD2_HUMAN]	51.257	3.2	1	1	1	1	0	9.32984e+06				1.37782	0.481265	1				2.76201	0.803058	1
P47756	F-actin-capping protein subunit beta OS=Homo sapiens GN=CAPZB PE=1 SV=4 - [CAPZB_HUMAN]	31.3308	7.22	1	2	2	12	5.37801e+07	9.54806e+07	1.34069	0.0039776	4	0.726142	-0.442798	1	1.60925	0.203027	4	2.7228	0.78243	1
P51570	Galactokinase OS=Homo sapiens GN=GALK1 PE=1 SV=1 - [GALK1_HUMAN]	42.2456	8.42	1	3	3	10	1.58113e+07	1.96567e+07	1.65895	0.311272	3	1.97325	0.999452	2	1.96091	0.48816	2	2.71546	0.778537	2
Q16527	Cysteine and glycine-rich protein 2 OS=Homo sapiens GN=CSRP2 PE=1 SV=3 - [CSRP2_HUMAN]	20.9399	12.95	1	2	2	11	3.95206e+07	4.06225e+07	1.24903	-0.0981881	3	1.17667	0.253583	4	1.51355	0.114568	3	2.70373	0.772291	4
P52907	F-actin-capping protein subunit alpha-1 OS=Homo sapiens GN=CAPZA1 PE=1 SV=3 - [CAZA1_HUMAN]	32.9023	10.84	1	2	2	10	21739301	5.0733e+07	3.4725	1.37698	3	1.23499	0.323378	4	3.62274	1.37372	3	2.67964	0.759378	3
Q9NZT2	Opioid growth factor receptor OS=Homo sapiens GN=OGFR PE=1 SV=3 - [OGFR_HUMAN]	73.2801	11.23	1	6	6	19	1.54301e+07	1.23108e+07	1.60308	0.261848	8	1.00569	0.0270626	4	1.39232	-0.00587409	8	2.61614	0.724778	4
P26641	Elongation factor 1-gamma OS=Homo sapiens GN=EEF1G PE=1 SV=3 - [EF1G_HUMAN]	50.0871	8.47	1	3	3	18	4.56426e+07	3.35079e+07	1.88014	0.491844	5	1.07283	0.120301	5	1.309	-0.0949023	5	2.58052	0.705003	5
Q9BTE7	DCN1-like protein 5 OS=Homo sapiens GN=DCUN1D5 PE=1 SV=1 - [DCNL5_HUMAN]	27.4906	12.66	1	4	4	10	2.64259e+07	2.2958e+07				2.15463	1.12632	2	1.75853	0.331008	1	2.52781	0.67523	2
P61978	Heterogeneous nuclear ribonucleoprotein K OS=Homo sapiens GN=HNRNPK PE=1 SV=1 - [HNRPK_HUMAN]	50.9444	10.58	1	5	5	27	3.91672e+07	4.21444e+07	2.0215	0.596429	7	1.16297	0.236691	8	1.98483	0.505654	7	2.49157	0.654396	6
O00422	Histone deacetylase complex subunit SAP18 OS=Homo sapiens GN=SAP18 PE=1 SV=1 - [SAP18_HUMAN]	17.55	20.26	1	3	3	8	1.48554e+07	3.31729e+07	1.53886	0.202862	3	0.843849	-0.226066	2	1.10175	-0.343564	3	2.48993	0.653443	2
P49411	Elongation factor Tu, mitochondrial OS=Homo sapiens GN=TUFM PE=1 SV=2 - [EFTU_HUMAN]	49.5102	9.96	1	4	4	16	6.10753e+07	1.97199e+07	1.53123	0.195687	5	2.0082	1.02478	4	1.55732	0.155697	5	2.46945	0.641527	4
Q96P63	Serpin B12 OS=Homo sapiens GN=SERPINB12 PE=1 SV=1 - [SPB12_HUMAN]	46.2471	5.93	1	2	2	3	2.91469e+06	20367740	0.9269	-0.528513	2	0.924851	-0.0938287	1	0.71474	-0.967875	2	2.43422	0.620799	1
P07339	Cathepsin D OS=Homo sapiens GN=CTSD PE=1 SV=1 - [CATD_HUMAN]	44.5236	4.61	1	2	2	3	0	4.55391e+07				1.2733	0.367445	2				2.43264	0.619861	2
P62857	40S ribosomal protein S28 OS=Homo sapiens GN=RPS28 PE=1 SV=1 - [RS28_HUMAN]	7.8362	13.04	1	1	1	1	0	1.87265e+07				0.256754	-1.94266	1				2.42904	0.617722	1
Q15436	Protein transport protein Sec23A OS=Homo sapiens GN=SEC23A PE=1 SV=2 - [SC23A_HUMAN]	86.1053	4.31	1	3	3	8	1.59583e+07	7927975	1.56973	0.231516	2	1	0.018878	3	2.05864	0.558327	2	2.42432	0.614919	3
P12004	Proliferating cell nuclear antigen OS=Homo sapiens GN=PCNA PE=1 SV=1 - [PCNA_HUMAN]	28.7503	12.26	1	3	3	4	7.8921e+06	6.61039e+06	1.17928	-0.181094	1	4.9885	2.33749	1	0.844231	-0.727655	1	2.42082	0.612835	1
P49419	Alpha-aminoadipic semialdehyde dehydrogenase OS=Homo sapiens GN=ALDH7A1 PE=1 SV=5 - [AL7A1_HUMAN]	58.4501	9.65	1	5	5	18	2.59888e+07	5.49663e+07	1.16174	-0.202712	5	1.242	0.331539	6	1.29508	-0.110322	5	2.39623	0.598107	6
Q9NQW6	Actin-binding protein anillin OS=Homo sapiens GN=ANLN PE=1 SV=2 - [ANLN_HUMAN]	124.122	1.51	1	2	2	15	1.81761e+07	2.53707e+07	2.31004	0.788917	1	1.46996	0.574657	3	1.70771	0.288699	1	2.39369	0.596572	3
P04075	Fructose-bisphosphate aldolase A OS=Homo sapiens GN=ALDOA PE=1 SV=2 - [ALDOA_HUMAN]	39.3953	10.16	1	3	3	15	4.10506e+07	7.82974e+07	3.50694	1.39121	4	2.65796	1.4292	4	2.61379	0.902776	4	2.34322	0.56583	4
P62937	Peptidyl-prolyl cis-trans isomerase A OS=Homo sapiens GN=PPIA PE=1 SV=2 - [PPIA_HUMAN]	18.0009	28.48	4	7	7	79	3.34464e+08	6.68219e+08	1.4029	0.0694115	22	0.876359	-0.171527	22	1.67676	0.262316	23	2.30065	0.53938	22
P26447	Protein S100-A4 OS=Homo sapiens GN=S100A4 PE=1 SV=1 - [S10A4_HUMAN]	11.7207	7.92	1	1	1	3	1.4506e+07	21527434	1.41731	0.0841582	1	1.3223	0.421929	1	1.43695	0.0396499	1	2.29327	0.534742	1
P21333	Filamin-A OS=Homo sapiens GN=FLNA PE=1 SV=4 - [FLNA_HUMAN]	280.564	3.66	1	8	8	31	1.98508e+07	2.06806e+07	1.16502	-0.198646	8	1.31642	0.415503	6	1.32751	-0.0746384	9	2.28149	0.527315	7
P63244	Guanine nucleotide-binding protein subunit beta-2-like 1 OS=Homo sapiens GN=GNB2L1 PE=1 SV=3 - [GBLP_HUMAN]	35.0546	2.21	1	1	1	1	0	1.08077e+06										2.26389	0.51614	1
Q13596	Sorting nexin-1 OS=Homo sapiens GN=SNX1 PE=1 SV=3 - [SNX1_HUMAN]	59.0331	2.68	1	1	1	1	0	3.63665e+06				1.05565	0.0970142	1				2.25938	0.513268	1
Q9BQG2	Peroxisomal NADH pyrophosphatase NUDT12 OS=Homo sapiens GN=NUDT12 PE=1 SV=1 - [NUD12_HUMAN]	52.0427	10.39	1	5	5	15	2.61189e+07	1.62366e+07	0.830541	-0.686876	7	0.973571	-0.0197636	5	1.45671	0.0593491	7	2.25315	0.509281	5
Q6YN16	Hydroxysteroid dehydrogenase-like protein 2 OS=Homo sapiens GN=HSDL2 PE=1 SV=1 - [HSDL2_HUMAN]	45.3655	16.27	1	7	7	54	2.25357e+08	221619434	1.72828	0.370334	13	1.16121	0.234507	11	1.92047	0.458097	13	2.23582	0.498145	12
O14818	Proteasome subunit alpha type-7 OS=Homo sapiens GN=PSMA7 PE=1 SV=1 - [PSA7_HUMAN]	27.8696	7.66	2	2	2	9	1.60452e+07	3.31905e+07	5.40077	2.01417	1	1.63633	0.729338	2	7.80735	2.48147	1	2.22814	0.493181	2
P09661	U2 small nuclear ribonucleoprotein A' OS=Homo sapiens GN=SNRPA1 PE=1 SV=2 - [RU2A_HUMAN]	28.3981	5.49	1	1	1	2	0	5.20102e+06				1.18346	0.26189	1				2.19248	0.469902	2
P60174	Triosephosphate isomerase OS=Homo sapiens GN=TPI1 PE=1 SV=3 - [TPIS_HUMAN]	30.7717	8.74	1	2	2	16	1.35981e+07	1.1606e+07	1.65803	0.310475	2	1.51408	0.617317	5	1.18934	-0.2332	2	2.1733	0.457223	4
Q8N1G4	Leucine-rich repeat-containing protein 47 OS=Homo sapiens GN=LRRC47 PE=1 SV=1 - [LRC47_HUMAN]	63.4337	5.66	1	3	3	7	27027428	1.38325e+07	1.28859	-0.0532114	2				1.28996	-0.116039	2	2.17211	0.456438	1
P78368	Casein kinase I isoform gamma-2 OS=Homo sapiens GN=CSNK1G2 PE=1 SV=1 - [KC1G2_HUMAN]	47.4272	2.17	3	1	1	2	1.23749e+07	2.09038e+06	0.600354	-1.15511	1	0.354876	-1.47574	1	0.870991	-0.682635	1	2.15733	0.446584	1
O60701	UDP-glucose 6-dehydrogenase OS=Homo sapiens GN=UGDH PE=1 SV=1 - [UGDH_HUMAN]	54.9893	9.11	1	4	4	19	7.20173e+07	9.31031e+07	1.54568	0.209238	5	1.51807	0.621119	6	1.8428	0.398536	5	2.14907	0.441054	6
Q99661	Kinesin-like protein KIF2C OS=Homo sapiens GN=KIF2C PE=1 SV=2 - [KIF2C_HUMAN]	81.2612	2.21	1	2	2	9	2.51728e+07	4.30823e+07	19.6143	3.87483	2	0.908287	-0.119901	1	19.9009	3.8314	2	2.13923	0.434429	1
Q9Y6I4	Ubiquitin carboxyl-terminal hydrolase 3 OS=Homo sapiens GN=USP3 PE=1 SV=2 - [UBP3_HUMAN]	58.8589	5.19	1	2	2	16	1.1239e+07	1.59133e+07	1.51028	0.175816	2	0.679177	-0.539261	4	1.63977	0.230125	2	2.13287	0.430132	5
P33992	DNA replication licensing factor MCM5 OS=Homo sapiens GN=MCM5 PE=1 SV=5 - [MCM5_HUMAN]	82.2332	8.86	1	5	5	9	1.83732e+07	1.00437e+08	3.59603	1.4274	1	0.9745	-0.0183879	3	1.16479	-0.263296	1	2.12923	0.427673	3
P00813	Adenosine deaminase OS=Homo sapiens GN=ADA PE=1 SV=3 - [ADA_HUMAN]	40.7387	11.02	1	4	4	18	3.53529e+07	4.25963e+07				1.68035	0.76764	4				2.11318	0.416758	4
Q9Y4X0	AMME syndrome candidate gene 1 protein OS=Homo sapiens GN=AMMECR1 PE=1 SV=1 - [AMMR1_HUMAN]	35.4403	11.41	2	4	4	9	1.75445e+07	2.16994e+07	3.2159	1.26622	3	1.07412	0.122036	6	0.395167	-1.82283	3	2.10924	0.414062	5
P38606	V-type proton ATPase catalytic subunit A OS=Homo sapiens GN=ATP6V1A PE=1 SV=2 - [VATA_HUMAN]	68.2605	5.35	1	3	3	15	2.39647e+07	5.01565e+07	1.42068	0.0875855	4	1.1141	0.17476	6	1.2326	-0.181655	4	2.09702	0.405683	6
Q9UGI8	Testin OS=Homo sapiens GN=TES PE=1 SV=1 - [TES_HUMAN]	47.9639	7.84	1	3	3	5	1.15904e+07	9.70314e+06	2.34476	0.81044	2	1.86639	0.919128	1	2.04338	0.547592	2	2.09078	0.401382	2
Q9BZX2	Uridine-cytidine kinase 2 OS=Homo sapiens GN=UCK2 PE=1 SV=1 - [UCK2_HUMAN]	29.2811	9.2	2	3	3	6	2.10694e+07	3.83565e+07	1.57897	0.239988	1	0.675478	-0.547141	3	1.71904	0.298236	1	2.07412	0.389839	3
Q9HB71	Calcyclin-binding protein OS=Homo sapiens GN=CACYBP PE=1 SV=2 - [CYBP_HUMAN]	26.1936	3.07	1	1	1	6	59172164	100948500	1.84269	0.462816	3	1.65052	0.741796	3	2.13112	0.608248	3	2.05957	0.379685	3
Q9BRJ7	Protein syndesmos OS=Homo sapiens GN=NUDT16L1 PE=1 SV=1 - [SDOS_HUMAN]	23.3232	25.59	1	5	5	21	1.23783e+08	2.53383e+08	1.16723	-0.195913	6	1.00705	0.0290172	4	1.84681	0.40167	8	2.04377	0.368573	7
P50995	Annexin A11 OS=Homo sapiens GN=ANXA11 PE=1 SV=1 - [ANX11_HUMAN]	54.3551	1.58	1	1	1	2	5.28265e+06	5.70908e+06	4.16859	1.64056	1							2.03201	0.360248	1
P62263	40S ribosomal protein S14 OS=Homo sapiens GN=RPS14 PE=1 SV=3 - [RS14_HUMAN]	16.2625	17.88	1	3	3	14	1.27671e+07	5.67314e+06	2.40078	0.844502	4				1.46846	0.0709438	5	2.0315	0.359883	1
P45984	Mitogen-activated protein kinase 9 OS=Homo sapiens GN=MAPK9 PE=1 SV=2 - [MK09_HUMAN]	48.1081	4.95	1	1	2	4	2.85647e+07	3.06058e+07	1.77749	0.410845	1	0.768842	-0.360363	2	1.58518	0.181281	1	2.02937	0.358371	2
P22102	Trifunctional purine biosynthetic protein adenosine-3 OS=Homo sapiens GN=GART PE=1 SV=1 - [PUR2_HUMAN]	107.699	8.51	1	8	8	33	6.58777e+07	1.25387e+08	1.1908	-0.16707	8	1.11619	0.177463	12	1.27829	-0.12915	9	2.02408	0.354603	12
P63241	Eukaryotic translation initiation factor 5A-1 OS=Homo sapiens GN=EIF5A PE=1 SV=2 - [IF5A1_HUMAN]	16.8214	7.79	1	1	1	5	21603902	3.52556e+07	1.33767	0.000721486	3	1.46934	0.574045	1	2.21055	0.661039	3	2.02123	0.352569	1
P60981	Destrin OS=Homo sapiens GN=DSTN PE=1 SV=3 - [DEST_HUMAN]	18.4935	6.67	1	1	1	1	0	21531426										2.00807	0.343147	1
P62829	60S ribosomal protein L23 OS=Homo sapiens GN=RPL23 PE=1 SV=1 - [RL23_HUMAN]	14.8561	19.29	1	3	3	17	6.76946e+07	6.52033e+07	1.48582	0.152258	4	1.77437	0.846183	1	2.10846	0.592822	4	2.00734	0.342624	1
P35237	Serpin B6 OS=Homo sapiens GN=SERPINB6 PE=1 SV=3 - [SPB6_HUMAN]	42.5941	26.6	2	8	8	43	7.0513e+07	1.21687e+08	1.42854	0.0955427	5	0.951763	-0.0524471	11	1.73206	0.309125	5	2.00534	0.341184	11
P13796	Plastin-2 OS=Homo sapiens GN=LCP1 PE=1 SV=6 - [PLSL_HUMAN]	70.2439	2.07	2	1	1	2	0	8.57429e+06				0.417163	-1.24244	1				2.004	0.340219	1
P06737	Glycogen phosphorylase, liver form OS=Homo sapiens GN=PYGL PE=1 SV=4 - [PYGL_HUMAN]	97.087	16.65	3	17	17	49	1.00618e+08	9.06652e+07	1.16597	-0.197474	16	0.913497	-0.111651	10	1.33906	-0.0621398	15	1.99297	0.33226	11
Q15645	Pachytene checkpoint protein 2 homolog OS=Homo sapiens GN=TRIP13 PE=1 SV=2 - [PCH2_HUMAN]	48.5205	9.26	1	4	4	11	1.54535e+07	3.56062e+07	3.19448	1.25658	4	1.3306	0.43096	4	1.85891	0.411094	4	1.98668	0.3277	4
Q6P1Q9	Methyltransferase-like protein 2B OS=Homo sapiens GN=METTL2B PE=1 SV=3 - [MET2B_HUMAN]	43.3983	3.44	1	1	1	3	2.8574e+07	3.21472e+07	1.51445	0.179797	1	0.745024	-0.405764	1	1.52275	0.123315	1	1.97538	0.31947	1
O14965	Aurora kinase A OS=Homo sapiens GN=AURKA PE=1 SV=2 - [AURKA_HUMAN]	45.7808	12.16	1	4	4	16	3.44919e+07	4.81011e+07	1.75409	0.391723	7	1.10948	0.168763	4	1.9787	0.501189	7	1.97458	0.318883	5
Q92945	Far upstream element-binding protein 2 OS=Homo sapiens GN=KHSRP PE=1 SV=4 - [FUBP2_HUMAN]	73.07	11.95	1	6	6	20	3.00785e+07	3.47291e+07	1.86425	0.479593	8	1.18885	0.268447	6	2.19557	0.65123	8	1.9727	0.31751	6
Q9P258	Protein RCC2 OS=Homo sapiens GN=RCC2 PE=1 SV=2 - [RCC2_HUMAN]	56.0492	10.54	1	6	6	27	8.05909e+07	8.71365e+07	1.26715	-0.0774112	12	1	0.018878	9	1.19375	-0.227864	12	1.96529	0.31208	10
Q9Y5R8	Trafficking protein particle complex subunit 1 OS=Homo sapiens GN=TRAPPC1 PE=1 SV=1 - [TPPC1_HUMAN]	16.8206	6.9	1	1	1	5	1.98861e+07	2.27943e+07	1.4883	0.154666	2	1.33451	0.435185	2	1.38763	-0.010743	2	1.96145	0.30926	2
Q8NBF2	NHL repeat-containing protein 2 OS=Homo sapiens GN=NHLRC2 PE=1 SV=1 - [NHLC2_HUMAN]	79.3935	6.75	1	5	5	9	1.46965e+07	2.42736e+07	1.23531	-0.114125	5	1.1391	0.206768	3	1.42168	0.0242316	5	1.94558	0.297537	3
P29692	Elongation factor 1-delta OS=Homo sapiens GN=EEF1D PE=1 SV=5 - [EF1D_HUMAN]	31.1028	13.17	1	2	2	3	1.46782e+07	1.74069e+07	1.66126	0.313274	2	0.491483	-1.00591	1	1.98033	0.502377	2	1.94171	0.294664	1
Q9H0C8	Integrin-linked kinase-associated serine/threonine phosphatase 2C OS=Homo sapiens GN=ILKAP PE=1 SV=1 - [ILKAP_HUMAN]	42.8798	5.36	1	2	2	3	0	1.16033e+07				1.25213	0.343268	2				1.92834	0.284695	2
P11021	78 kDa glucose-regulated protein OS=Homo sapiens GN=HSPA5 PE=1 SV=2 - [GRP78_HUMAN]	72.2884	6.73	1	2	4	27	1.16678e+08	1.70096e+08	1.23149	-0.118594	3	0.833576	-0.243737	1	1.01502	-0.461855	3	1.92811	0.284529	1
P53611	Geranylgeranyl transferase type-2 subunit beta OS=Homo sapiens GN=RABGGTB PE=1 SV=2 - [PGTB2_HUMAN]	36.9003	3.32	1	1	1	1	0	3.87807e+07				1.57849	0.677427	1				1.92788	0.284354	1
P04818	Thymidylate synthase OS=Homo sapiens GN=TYMS PE=1 SV=3 - [TYSY_HUMAN]	35.6932	3.51	1	1	1	6	2.40131e+06	6.66151e+06	1.33278	-0.00456165	2	1.28843	0.384492	2	2.32909	0.736403	2	1.9267	0.283468	2
Q14258	E3 ubiquitin/ISG15 ligase TRIM25 OS=Homo sapiens GN=TRIM25 PE=1 SV=2 - [TRI25_HUMAN]	70.9277	8.57	1	5	5	19	3.08813e+07	4.59436e+07	1.72996	0.371737	8	1.04996	0.0892077	3	1.28979	-0.116232	8	1.90863	0.269874	3
Q99832	T-complex protein 1 subunit eta OS=Homo sapiens GN=CCT7 PE=1 SV=2 - [TCPH_HUMAN]	59.3289	11.05	1	6	6	27	3.98503e+07	5.62926e+07	1.68136	0.330628	9	1.36874	0.471731	10	1.70783	0.288804	9	1.90492	0.267066	10
P53999	Activated RNA polymerase II transcriptional coactivator p15 OS=Homo sapiens GN=SUB1 PE=1 SV=3 - [TCP4_HUMAN]	14.3864	20.47	1	3	3	23	3.26281e+07	3.03644e+07	1.28785	-0.0540359	5	0.693091	-0.510005	4	1.34379	-0.0570587	6	1.89955	0.262996	5
O43324	Eukaryotic translation elongation factor 1 epsilon-1 OS=Homo sapiens GN=EEF1E1 PE=1 SV=1 - [MCA3_HUMAN]	19.7983	8.62	1	2	2	18	3.7384e+07	2.6135e+07	1.97514	0.562952	4	0.785144	-0.330093	3	1.70751	0.288531	4	1.89451	0.259165	2
P31943	Heterogeneous nuclear ribonucleoprotein H OS=Homo sapiens GN=HNRNPH1 PE=1 SV=4 - [HNRH1_HUMAN]	49.1984	9.58	2	3	4	44	1.78476e+08	2.87002e+08	1.66709	0.318329	6	1.22198	0.308104	6	2.03494	0.541623	6	1.89306	0.258057	7
P24534	Elongation factor 1-beta OS=Homo sapiens GN=EEF1B2 PE=1 SV=3 - [EF1B_HUMAN]	24.7483	9.78	1	2	2	4	2.03697e+07	1.56453e+07	2.6357	0.979187	2	2.04578	1.05153	1	1.6984	0.280812	3	1.87809	0.246607	1
Q12904	Aminoacyl tRNA synthase complex-interacting multifunctional protein 1 OS=Homo sapiens GN=AIMP1 PE=1 SV=2 - [AIMP1_HUMAN]	34.3311	21.79	1	6	6	7	3.01377e+07	9.65277e+06	2.09157	0.645588	4	0.776863	-0.34539	1	1.80674	0.370025	4	1.87216	0.242043	1
Q6Q0C0	E3 ubiquitin-protein ligase TRAF7 OS=Homo sapiens GN=TRAF7 PE=1 SV=1 - [TRAF7_HUMAN]	74.5609	2.69	1	2	2	9	1.72122e+07	2.42679e+07	0.784497	-0.769159	2	0.513626	-0.942332	1	1.26915	-0.139504	3	1.87124	0.241337	1
P08238	Heat shock protein HSP 90-beta OS=Homo sapiens GN=HSP90AB1 PE=1 SV=4 - [HS90B_HUMAN]	83.2121	14.36	5	6	10	44	6.15991e+07	7.74577e+07	1.73301	0.374279	8	2.26309	1.19717	4	1.74507	0.319918	8	1.86727	0.238271	4
P24666	Low molecular weight phosphotyrosine protein phosphatase OS=Homo sapiens GN=ACP1 PE=1 SV=3 - [PPAC_HUMAN]	18.0308	13.29	1	2	2	16	2.46772e+07	2.232e+07	1.53032	0.194834	7	0.92444	-0.0944709	3	1.25342	-0.157498	7	1.86582	0.237149	4
P22392	Nucleoside diphosphate kinase B OS=Homo sapiens GN=NME2 PE=1 SV=1 - [NDKB_HUMAN]	17.2869	36.84	2	1	5	40	1.0048e+08	1.81051e+08	1.0992	-0.282551	3	0.983796	-0.00469033	4	1.36441	-0.0350867	3	1.86374	0.235536	4
P22234	Multifunctional protein ADE2 OS=Homo sapiens GN=PAICS PE=1 SV=3 - [PUR6_HUMAN]	47.0491	19.29	1	11	11	45	9.10708e+07	1.04801e+08	1.63301	0.288537	18	1.27049	0.364264	10	1.64525	0.234946	18	1.86286	0.234856	10
P46734	Dual specificity mitogen-activated protein kinase kinase 3 OS=Homo sapiens GN=MAP2K3 PE=1 SV=2 - [MP2K3_HUMAN]	39.2929	8.65	1	3	3	5	1.79985e+07	4.63392e+07	1.27562	-0.0677956	1	0.633169	-0.64046	1	1.46683	0.0693396	1	1.86144	0.233755	1
Q8IXV7	Kelch domain-containing protein 8B OS=Homo sapiens GN=KLHDC8B PE=2 SV=1 - [KLD8B_HUMAN]	37.652	2.82	1	1	1	1	0	6.44122e+06				1.41379	0.518445	1				1.86109	0.233489	1
P53365	Arfaptin-2 OS=Homo sapiens GN=ARFIP2 PE=1 SV=1 - [ARFP2_HUMAN]	37.8324	18.18	1	5	5	15	2.31873e+07	36033274	1.75459	0.392132	3	0.934236	-0.0792633	5	1.93892	0.471887	3	1.85091	0.225571	5
P53367	Arfaptin-1 OS=Homo sapiens GN=ARFIP1 PE=1 SV=2 - [ARFP1_HUMAN]	41.7126	15.28	1	4	4	10	20915209	1.46984e+07	0.671672	-0.99317	4	0.997777	0.0156675	4	0.57975	-1.26986	4	1.84372	0.219962	5
P07355	Annexin A2 OS=Homo sapiens GN=ANXA2 PE=1 SV=2 - [ANXA2_HUMAN]	38.5798	44.54	2	17	17	130	4.41694e+08	5.83251e+08	1.33721	0.000231046	35	1.08137	0.131738	32	1.64248	0.232508	37	1.84174	0.218412	32
P62888	60S ribosomal protein L30 OS=Homo sapiens GN=RPL30 PE=1 SV=2 - [RL30_HUMAN]	12.7757	33.91	1	5	5	20	8.04507e+07	8.71263e+07	1.22544	-0.125705	7	1.0542	0.0950198	5	1.45438	0.0570385	6	1.83627	0.214114	6
O15145	Actin-related protein 2/3 complex subunit 3 OS=Homo sapiens GN=ARPC3 PE=1 SV=3 - [ARPC3_HUMAN]	20.5334	3.37	1	1	1	9	4.73451e+07	54725582	1.26849	-0.0758885	2	1.18372	0.262209	3	1.52256	0.123136	2	1.83144	0.21032	3
P68104	Elongation factor 1-alpha 1 OS=Homo sapiens GN=EEF1A1 PE=1 SV=1 - [EF1A1_HUMAN]	50.1091	29.65	2	6	16	371	6.6598e+09	1.18145e+10	1.33526	-0.00188309	17	1.20923	0.292962	21	1.63513	0.226037	17	1.81827	0.199909	22
Q5MNZ6	WD repeat domain phosphoinositide-interacting protein 3 OS=Homo sapiens GN=WDR45B PE=2 SV=2 - [WIPI3_HUMAN]	38.0971	8.14	1	3	3	7	1.63149e+07	2.3763e+07	6.14043	2.19934	1	0.986876	-0.000181451	2	7.83968	2.48743	1	1.81711	0.198982	2
O15144	Actin-related protein 2/3 complex subunit 2 OS=Homo sapiens GN=ARPC2 PE=1 SV=1 - [ARPC2_HUMAN]	34.3115	7	1	2	2	4	8.81311e+06	2.5056e+07				1.45274	0.557656	2				1.81177	0.194737	2
Q15029	116 kDa U5 small nuclear ribonucleoprotein component OS=Homo sapiens GN=EFTUD2 PE=1 SV=1 - [U5S1_HUMAN]	109.366	4.94	1	3	4	17	8.69891e+07	1.54333e+07	1.43365	0.10069	4	0.875245	-0.173364	5	1.09253	-0.355696	4	1.80927	0.192748	4
P52597	Heterogeneous nuclear ribonucleoprotein F OS=Homo sapiens GN=HNRNPF PE=1 SV=3 - [HNRPF_HUMAN]	45.6429	14.94	1	4	5	39	1.01033e+08	1.81296e+08	1.60196	0.260839	1	1.00672	0.0285356	5	1.60024	0.194922	3	1.79945	0.184898	5
P41091	Eukaryotic translation initiation factor 2 subunit 3 OS=Homo sapiens GN=EIF2S3 PE=1 SV=3 - [IF2G_HUMAN]	51.0772	15.25	2	6	6	35	2.95122e+07	5.66662e+07	1.60445	0.263075	8	0.918749	-0.103379	7	1.49774	0.0994247	7	1.79734	0.183203	7
P32929	Cystathionine gamma-lyase OS=Homo sapiens GN=CTH PE=1 SV=3 - [CGL_HUMAN]	44.4795	5.93	1	2	2	2	0	6.92738e+06				0.876967	-0.170528	2				1.79648	0.182513	2
Q99873	Protein arginine N-methyltransferase 1 OS=Homo sapiens GN=PRMT1 PE=1 SV=2 - [ANM1_HUMAN]	41.4885	5.26	2	2	2	8	2.08627e+07	3.31256e+07	1.35095	0.0149761	1	1.1672	0.241935	1	1.45922	0.0618306	1	1.79309	0.179785	2
Q13126	S-methyl-5'-thioadenosine phosphorylase OS=Homo sapiens GN=MTAP PE=1 SV=2 - [MTAP_HUMAN]	31.2158	2.83	1	1	1	11	3.03643e+07	4.80612e+07	1.57992	0.240852	3	1.51368	0.616943	3	1.52271	0.123277	3	1.78871	0.176255	3
Q99439	Calponin-2 OS=Homo sapiens GN=CNN2 PE=1 SV=4 - [CNN2_HUMAN]	33.6753	9.39	1	3	3	22	7.92967e+07	1.07099e+08	1.70141	0.34773	5	1.23251	0.320474	5	1.83134	0.389537	5	1.78803	0.17571	5
P50454	Serpin H1 OS=Homo sapiens GN=SERPINH1 PE=1 SV=2 - [SERPH_HUMAN]	46.4112	10.05	1	4	4	23	4.74214e+07	6.59507e+07	1.47914	0.145756	5	1.11324	0.173645	8	1.60362	0.197969	5	1.78243	0.171187	8
P22061	Protein-L-isoaspartate(D-aspartate) O-methyltransferase OS=Homo sapiens GN=PCMT1 PE=1 SV=4 - [PIMT_HUMAN]	24.6206	14.98	1	4	4	20	1.46221e+08	1.85502e+08	1.45529	0.122307	4	1.30171	0.399287	6	1.70109	0.283098	4	1.78067	0.169762	6
Q92567	Protein FAM168A OS=Homo sapiens GN=FAM168A PE=1 SV=2 - [F168A_HUMAN]	26.1675	4.1	1	1	1	4	9.98453e+07	1.4485e+08	4.2755	1.67709	1	1.39358	0.497673	3	5.3275	1.93009	1	1.7797	0.168972	3
P00338	L-lactate dehydrogenase A chain OS=Homo sapiens GN=LDHA PE=1 SV=2 - [LDHA_HUMAN]	36.6654	11.75	1	4	4	14	4.82028e+07	4.53469e+07	1.69747	0.344387	5	9.06393	3.19902	4	1.4476	0.0502951	6	1.77823	0.167779	4
P21266	Glutathione S-transferase Mu 3 OS=Homo sapiens GN=GSTM3 PE=1 SV=3 - [GSTM3_HUMAN]	26.5421	10.22	1	3	3	15	3.59077e+07	9.67133e+07	1.26059	-0.0849039	3	1.02744	0.0579334	4	1.58116	0.177615	3	1.77524	0.165354	4
Q96AZ6	Interferon-stimulated gene 20 kDa protein OS=Homo sapiens GN=ISG20 PE=1 SV=2 - [ISG20_HUMAN]	20.3506	44.2	1	6	6	38	1.89736e+08	2.41302e+08	1.42894	0.0959409	12	0.791558	-0.318355	15	1.69073	0.274281	13	1.76168	0.154294	15
P23921	Ribonucleoside-diphosphate reductase large subunit OS=Homo sapiens GN=RRM1 PE=1 SV=1 - [RIR1_HUMAN]	90.0125	7.45	1	6	6	14	23525326	2.94435e+07	1.07367	-0.316446	4	1.40295	0.507345	3	1.20136	-0.218691	5	1.75835	0.151559	3
Q96IJ6	Mannose-1-phosphate guanyltransferase alpha OS=Homo sapiens GN=GMPPA PE=1 SV=1 - [GMPPA_HUMAN]	46.2621	9.29	1	3	3	8	1.03352e+07	1.13744e+07	1.75762	0.394622	4	1.31836	0.417621	4	1.82335	0.383231	4	1.75748	0.15085	4
P39019	40S ribosomal protein S19 OS=Homo sapiens GN=RPS19 PE=1 SV=2 - [RS19_HUMAN]	16.0505	11.03	1	2	2	11	3.00678e+07	3.47052e+07	1.44262	0.109688	2	1.3653	0.4681	3	1.76115	0.333154	2	1.7472	0.142386	3
P13639	Elongation factor 2 OS=Homo sapiens GN=EEF2 PE=1 SV=4 - [EF2_HUMAN]	95.277	18.41	1	15	16	70	1.86072e+08	1.83678e+08	1.15155	-0.215428	22	1.10526	0.163266	17	1.18051	-0.243951	21	1.74682	0.14207	17
Q13148	TAR DNA-binding protein 43 OS=Homo sapiens GN=TARDBP PE=1 SV=1 - [TADBP_HUMAN]	44.7113	5.07	1	2	2	9	5.06519e+07	6.21278e+07	1.65441	0.307317	5	1.24694	0.337273	2	1.71548	0.295249	5	1.73917	0.135739	2
P60709	Actin, cytoplasmic 1 OS=Homo sapiens GN=ACTB PE=1 SV=1 - [ACTB_HUMAN]	41.7097	39.2	8	4	14	183	4.29871e+08	4.60516e+08	1.46548	0.132378	8	1.72281	0.803642	10	1.52645	0.126818	8	1.73873	0.135373	10
P25205	DNA replication licensing factor MCM3 OS=Homo sapiens GN=MCM3 PE=1 SV=3 - [MCM3_HUMAN]	90.924	13.49	1	10	10	42	6.64431e+07	8.74457e+07	1.25947	-0.0861787	13	1.01687	0.0430071	11	1.06157	-0.397166	14	1.72544	0.124305	10
P35520	Cystathionine beta-synthase OS=Homo sapiens GN=CBS PE=1 SV=2 - [CBS_HUMAN]	60.5482	2	1	1	1	3	1.25336e+07	2.18308e+07	1.28371	-0.0586857	2	1.16597	0.240412	1	1.75479	0.327937	2	1.7184	0.118407	1
Q16186	Proteasomal ubiquitin receptor ADRM1 OS=Homo sapiens GN=ADRM1 PE=1 SV=2 - [ADRM1_HUMAN]	42.1268	3.93	1	1	1	7	2.22021e+07	1.92385e+07	1.76819	0.40327	3	1.06045	0.103553	2	1.91771	0.456023	3	1.71582	0.116234	2
P14618	Pyruvate kinase PKM OS=Homo sapiens GN=PKM PE=1 SV=4 - [KPYM_HUMAN]	57.9	14.12	2	8	8	55	1.24699e+08	1.7657e+08	1.23852	-0.110379	14	1.3306	0.430952	15	1.39777	-0.000238836	14	1.71413	0.114817	14
Q86YZ3	Hornerin OS=Homo sapiens GN=HRNR PE=1 SV=2 - [HORN_HUMAN]	282.228	9.05	1	6	6	22	3.01414e+07	2.16033e+07	1.54311	0.206837	9	0.44348	-1.15418	7	0.85179	-0.714794	9	1.71396	0.114672	7
O14732	Inositol monophosphatase 2 OS=Homo sapiens GN=IMPA2 PE=1 SV=1 - [IMPA2_HUMAN]	31.3011	7.64	1	2	2	4	0	2.292e+07				1.29298	0.389579	1				1.71269	0.113599	2
P29372	DNA-3-methyladenine glycosylase OS=Homo sapiens GN=MPG PE=1 SV=3 - [3MG_HUMAN]	32.8478	11.07	1	3	3	12	2.07536e+07	1.9937e+07	2.11512	0.661741	3	1.0398	0.0751881	2	3.01971	1.11105	6	1.70806	0.109699	4
P26599	Polypyrimidine tract-binding protein 1 OS=Homo sapiens GN=PTBP1 PE=1 SV=1 - [PTBP1_HUMAN]	57.1856	5.46	1	3	3	8	3.11299e+07	46110501	1.20708	-0.147472	6	0.832561	-0.245494	1	1.56878	0.166283	6	1.7072	0.108968	1
O75643	U5 small nuclear ribonucleoprotein 200 kDa helicase OS=Homo sapiens GN=SNRNP200 PE=1 SV=2 - [U520_HUMAN]	244.353	2.11	1	4	4	7	4.29298e+06	1.19902e+07	7.48628	2.48525	1	0.868996	-0.183701	1	6.46783	2.20992	1	1.70031	0.103133	3
P00390	Glutathione reductase, mitochondrial OS=Homo sapiens GN=GSR PE=1 SV=2 - [GSHR_HUMAN]	56.221	17.24	1	7	7	26	1.14555e+08	2.41127e+08	1.47346	0.140205	5	1.00168	0.0213002	8	1.6482	0.237523	5	1.68377	0.0890299	8
P61289	Proteasome activator complex subunit 3 OS=Homo sapiens GN=PSME3 PE=1 SV=1 - [PSME3_HUMAN]	29.4876	2.76	1	1	1	2	0	1.59508e+08				1.3369	0.437771	2				1.68148	0.0870689	2
Q8WUM4	Programmed cell death 6-interacting protein OS=Homo sapiens GN=PDCD6IP PE=1 SV=1 - [PDC6I_HUMAN]	95.9631	5.53	1	5	5	15	1.62622e+07	4.3578e+07	1.09895	-0.282872	4	0.708284	-0.478721	5	1.13869	-0.295987	4	1.68042	0.0861585	7
P32119	Peroxiredoxin-2 OS=Homo sapiens GN=PRDX2 PE=1 SV=5 - [PRDX2_HUMAN]	21.8782	33.33	1	8	9	133	2.46415e+09	3.49474e+09	1.20894	-0.145259	20	1.13938	0.207123	22	1.36387	-0.0356626	20	1.66924	0.0765329	22
Q8IYB5	Stromal membrane-associated protein 1 OS=Homo sapiens GN=SMAP1 PE=1 SV=2 - [SMAP1_HUMAN]	50.3544	7.71	1	3	3	13	6.48325e+07	5.06873e+07	1.19298	-0.164435	7	0.83328	-0.244249	5	1.24534	-0.166827	7	1.66847	0.0758603	5
Q06323	Proteasome activator complex subunit 1 OS=Homo sapiens GN=PSME1 PE=1 SV=1 - [PSME1_HUMAN]	28.705	14.06	1	3	3	13	5.16817e+07	5.30731e+07	1.49259	0.158822	4	0.913399	-0.111805	5	2.0046	0.519953	4	1.66654	0.0741979	5
P61247	40S ribosomal protein S3a OS=Homo sapiens GN=RPS3A PE=1 SV=2 - [RS3A_HUMAN]	29.9257	7.95	1	2	2	4	3.07786e+07	2.33433e+07	1.32498	-0.0130336	2	0.871151	-0.180128	1	1.46635	0.0688692	2	1.66471	0.0726081	1
Q01813	6-phosphofructokinase type C OS=Homo sapiens GN=PFKP PE=1 SV=2 - [K6PP_HUMAN]	85.5415	18.11	2	12	14	90	8.224e+07	1.26311e+08	1.36898	0.0340982	21	1.02985	0.0613082	14	1.47315	0.0755381	21	1.66332	0.0714076	13
Q16576	Histone-binding protein RBBP7 OS=Homo sapiens GN=RBBP7 PE=1 SV=1 - [RBBP7_HUMAN]	47.7902	7.06	2	3	3	11	1.3037e+07	8.23977e+06	0.971442	-0.460799	2	0.806068	-0.292149	1	1.37492	-0.0240189	2	1.66003	0.068547	1
Q9NVX2	Notchless protein homolog 1 OS=Homo sapiens GN=NLE1 PE=1 SV=4 - [NLE1_HUMAN]	53.2871	4.33	1	2	2	3	1.77483e+07	2.79401e+07				1.21549	0.300421	2				1.65765	0.0664819	2
Q99497	Protein DJ-1 OS=Homo sapiens GN=PARK7 PE=1 SV=2 - [PARK7_HUMAN]	19.8785	33.86	1	8	8	99	1.01824e+09	1.60624e+09	1.28522	-0.0569831	26	0.930826	-0.0845383	21	1.52758	0.127882	26	1.65482	0.0640157	21
P61077	Ubiquitin-conjugating enzyme E2 D3 OS=Homo sapiens GN=UBE2D3 PE=1 SV=1 - [UB2D3_HUMAN]	16.6764	7.48	2	1	1	6	1.63407e+08	3.46504e+08	1.29671	-0.0441407	2	1.02372	0.0526946	3	1.46004	0.062648	2	1.65465	0.0638614	3
P10809	60 kDa heat shock protein, mitochondrial OS=Homo sapiens GN=HSPD1 PE=1 SV=2 - [CH60_HUMAN]	61.0164	13.44	1	6	6	19	4.46241e+07	1.8606e+07	1.02272	-0.386588	9	1.0745	0.122541	5	1.19802	-0.222707	10	1.6494	0.0592843	5
Q13057	Bifunctional coenzyme A synthase OS=Homo sapiens GN=COASY PE=1 SV=4 - [COASY_HUMAN]	62.29	5.85	1	3	3	6	3.50935e+07	3.38502e+07	0.759765	-0.815375	2	0.959833	-0.0402671	2	0.613497	-1.18824	2	1.64793	0.0579946	2
P10599	Thioredoxin OS=Homo sapiens GN=TXN PE=1 SV=3 - [THIO_HUMAN]	11.7297	31.43	1	4	4	32	1.38243e+08	2.06645e+08	0.833156	-0.682342	9	0.926143	-0.0918158	9	1.07253	-0.382346	10	1.64689	0.057084	9
P45974	Ubiquitin carboxyl-terminal hydrolase 5 OS=Homo sapiens GN=USP5 PE=1 SV=2 - [UBP5_HUMAN]	95.7253	5.94	1	5	5	10	1.1722e+07	1.2396e+07	1.56105	0.223519	4	1.36661	0.46948	3	1.70756	0.28857	5	1.64566	0.0560046	3
Q8WW59	SPRY domain-containing protein 4 OS=Homo sapiens GN=SPRYD4 PE=1 SV=2 - [SPRY4_HUMAN]	23.114	14.49	1	3	3	7	4.30567e+07	3.86834e+07	1.19665	-0.160003	3	1.08528	0.136946	2	1.34196	-0.0590276	3	1.64147	0.052329	2
O60678	Protein arginine N-methyltransferase 3 OS=Homo sapiens GN=PRMT3 PE=1 SV=3 - [ANM3_HUMAN]	59.8378	2.07	1	1	1	5	8.61242e+06	27397291	1.32495	-0.0130597	1	1.01475	0.0399959	2	0.895238	-0.643021	1	1.63782	0.0491196	2
O75533	Splicing factor 3B subunit 1 OS=Homo sapiens GN=SF3B1 PE=1 SV=3 - [SF3B1_HUMAN]	145.738	5.98	1	8	8	13	1.93548e+07	3.57661e+07	2.33455	0.804144	3	8.85873	3.16598	2	0.925205	-0.59552	3	1.63481	0.0464642	3
P30041	Peroxiredoxin-6 OS=Homo sapiens GN=PRDX6 PE=1 SV=3 - [PRDX6_HUMAN]	25.0192	16.07	1	5	5	18	7.04493e+07	5.4218e+07	1.44619	0.113257	5	11.8559	3.58641	6	1.70219	0.284029	5	1.63153	0.0435648	7
Q04446	1,4-alpha-glucan-branching enzyme OS=Homo sapiens GN=GBE1 PE=1 SV=3 - [GLGB_HUMAN]	80.4226	4.13	1	2	2	6	1.14165e+07	1.76191e+07	1.46633	0.133206	1	1.08812	0.140713	1	1.08104	-0.370942	2	1.63107	0.0431597	1
P17987	T-complex protein 1 subunit alpha OS=Homo sapiens GN=TCP1 PE=1 SV=1 - [TCPA_HUMAN]	60.3056	1.8	1	1	1	2	2.27681e+07	4.49162e+07	1.15388	-0.212511	1	1.12035	0.182821	1	1.0652	-0.392237	1	1.61361	0.0276298	1
O60664	Perilipin-3 OS=Homo sapiens GN=PLIN3 PE=1 SV=3 - [PLIN3_HUMAN]	47.0459	19.35	1	6	6	29	4.62898e+07	4.3432e+07	1.73291	0.374201	10	1.33817	0.439139	7	1.75024	0.324192	9	1.61291	0.027007	7
P46782	40S ribosomal protein S5 OS=Homo sapiens GN=RPS5 PE=1 SV=4 - [RS5_HUMAN]	22.8621	9.8	1	3	3	18	8.00278e+07	1.44825e+08	1.45764	0.12463	5	1.35181	0.453766	4	1.39448	-0.00363535	5	1.60908	0.023571	4
Q06830	Peroxiredoxin-1 OS=Homo sapiens GN=PRDX1 PE=1 SV=1 - [PRDX1_HUMAN]	22.0963	53.27	1	12	16	436	5661932661	8772380442	1.35261	0.0167463	61	0.931734	-0.0831319	57	1.52141	0.12204	60	1.60884	0.0233575	57
Q9UMS4	Pre-mRNA-processing factor 19 OS=Homo sapiens GN=PRPF19 PE=1 SV=1 - [PRP19_HUMAN]	55.1463	2.18	1	1	1	4	2.48168e+07	3.79928e+07				1.02101	0.0488721	1				1.60876	0.023287	1
Q9UL46	Proteasome activator complex subunit 2 OS=Homo sapiens GN=PSME2 PE=1 SV=4 - [PSME2_HUMAN]	27.3843	20.92	1	6	6	25	1.36117e+08	1.70525e+08	1.5169	0.18213	5	0.832412	-0.245753	6	1.65666	0.244916	5	1.60338	0.0184564	5
P31153	S-adenosylmethionine synthase isoform type-2 OS=Homo sapiens GN=MAT2A PE=1 SV=1 - [METK2_HUMAN]	43.6333	16.71	1	8	8	31	9.51139e+07	9.59321e+07	1.44131	0.108382	15	1.09323	0.147469	8	1.52721	0.127534	16	1.60059	0.0159384	8
Q5TA50	Ceramide-1-phosphate transfer protein OS=Homo sapiens GN=GLTPD1 PE=1 SV=1 - [CPTP_HUMAN]	24.3496	3.27	1	1	1	3	0	25563661				1.09691	0.152326	3				1.5994	0.0148739	3
P60866	40S ribosomal protein S20 OS=Homo sapiens GN=RPS20 PE=1 SV=1 - [RS20_HUMAN]	13.3643	19.33	1	2	2	9	3.93538e+07	5.4363e+07	1.36269	0.0274631	4	0.880936	-0.164013	3	1.51367	0.114686	4	1.59818	0.0137729	3
P11413	Glucose-6-phosphate 1-dehydrogenase OS=Homo sapiens GN=G6PD PE=1 SV=4 - [G6PD_HUMAN]	59.219	14.17	1	7	7	22	5.40111e+07	7.20591e+07	1.3078	-0.0318599	7	1.18432	0.262935	6	1.46882	0.0712886	6	1.59757	0.0132209	6
Q9H6T0	Epithelial splicing regulatory protein 2 OS=Homo sapiens GN=ESRP2 PE=1 SV=1 - [ESRP2_HUMAN]	78.3511	1.51	1	1	1	5	5.19898e+06	9.77384e+06	0.644191	-1.05344	3				1.10349	-0.341296	3	1.59718	0.0128664	1
Q8NB16	Mixed lineage kinase domain-like protein OS=Homo sapiens GN=MLKL PE=1 SV=1 - [MLKL_HUMAN]	54.4445	9.55	1	4	4	14	1.60031e+07	4.24283e+07	1.27292	-0.0708584	3	1.00047	0.019562	4	1.21356	-0.204121	3	1.59535	0.0112126	4
P78527	DNA-dependent protein kinase catalytic subunit OS=Homo sapiens GN=PRKDC PE=1 SV=3 - [PRKDC_HUMAN]	468.788	3.2	1	13	13	40	2.81677e+07	3.46316e+07	1.28539	-0.0567934	12	1.61225	0.707956	11	1.61182	0.205326	12	1.59495	0.0108511	10
P05089	Arginase-1 OS=Homo sapiens GN=ARG1 PE=1 SV=2 - [ARGI1_HUMAN]	34.7133	5.9	1	2	2	2	5.38764e+06	3.41969e+06				0.435281	-1.1811	1				1.58973	0.00611633	1
Q5VWZ2	Lysophospholipase-like protein 1 OS=Homo sapiens GN=LYPLAL1 PE=1 SV=3 - [LYPL1_HUMAN]	26.2994	23.21	1	6	6	54	1.08804e+08	1.61878e+08	1.48036	0.146953	16	1.1119	0.171906	11	1.60232	0.196801	13	1.58947	0.00588818	11
Q969T9	WW domain-binding protein 2 OS=Homo sapiens GN=WBP2 PE=1 SV=1 - [WBP2_HUMAN]	28.0684	12.64	1	3	3	13	3.60734e+07	4.83318e+07	1.66426	0.315877	2	0.866038	-0.188619	7	1.8062	0.369596	2	1.58655	0.00323494	7
P28482	Mitogen-activated protein kinase 1 OS=Homo sapiens GN=MAPK1 PE=1 SV=3 - [MK01_HUMAN]	41.3632	9.44	3	3	4	15	5.65012e+07	6.28885e+07	1.49116	0.157438	6	1.06471	0.10934	2	1.62561	0.217621	6	1.58424	0.00112789	2
O60313	Dynamin-like 120 kDa protein, mitochondrial OS=Homo sapiens GN=OPA1 PE=1 SV=3 - [OPA1_HUMAN]	111.561	6.46	1	7	7	32	4.93289e+07	3.28607e+07	1.16692	-0.196288	10	0.803318	-0.297078	5	1.03477	-0.434056	10	1.58079	-0.00201319	5
P09543	2',3'-cyclic-nucleotide 3'-phosphodiesterase OS=Homo sapiens GN=CNP PE=1 SV=2 - [CN37_HUMAN]	47.5487	2.14	1	1	1	5	27562513	4.86619e+07				0.997204	0.014838	1	0.0994964	-3.81258	1	1.57614	-0.00626751	1
P17516	Aldo-keto reductase family 1 member C4 OS=Homo sapiens GN=AKR1C4 PE=1 SV=3 - [AK1C4_HUMAN]	37.0429	11.15	4	5	5	19	7.59929e+07	1.18948e+08	1.48027	0.146856	5	1.56758	0.667418	8	1.66799	0.254742	5	1.5621	-0.0191789	7
Q96BW5	Phosphotriesterase-related protein OS=Homo sapiens GN=PTER PE=1 SV=1 - [PTER_HUMAN]	38.993	13.18	1	5	5	22	4.89775e+07	4.59478e+07	1.58536	0.24581	7	1.00478	0.0257612	7	1.63504	0.225962	7	1.55755	-0.0233853	7
P62906	60S ribosomal protein L10a OS=Homo sapiens GN=RPL10A PE=1 SV=2 - [RL10A_HUMAN]	24.8155	13.36	1	3	3	17	1.45839e+08	1.77534e+08	1.88252	0.493665	6	0.905598	-0.124179	3	1.95366	0.482815	6	1.55172	-0.0287931	3
Q9NS86	LanC-like protein 2 OS=Homo sapiens GN=LANCL2 PE=1 SV=1 - [LANC2_HUMAN]	50.8214	2.44	1	1	1	11	3.46663e+07	9.57243e+07	0.582198	-1.19942	2	0.781524	-0.336759	3	1.18792	-0.234931	2	1.5502	-0.0302062	3
O43143	Putative pre-mRNA-splicing factor ATP-dependent RNA helicase DHX15 OS=Homo sapiens GN=DHX15 PE=1 SV=2 - [DHX15_HUMAN]	90.8752	12.45	1	11	11	78	6.58809e+07	1.11046e+08	1.35507	0.0193642	20	1.08711	0.139373	24	1.23671	-0.176862	20	1.54677	-0.0334038	24
P00492	Hypoxanthine-guanine phosphoribosyltransferase OS=Homo sapiens GN=HPRT1 PE=1 SV=2 - [HPRT_HUMAN]	24.5636	5.96	1	1	1	1	0	2.3299e+07				0.924991	-0.0936109	1				1.54384	-0.036134	1
P63173	60S ribosomal protein L38 OS=Homo sapiens GN=RPL38 PE=1 SV=2 - [RL38_HUMAN]	8.21273	34.29	1	4	4	39	1.14652e+08	7.87433e+07	1.27969	-0.063203	8	0.908024	-0.12032	3	1.55475	0.153319	6	1.54274	-0.0371633	3
P17812	CTP synthase 1 OS=Homo sapiens GN=CTPS1 PE=1 SV=2 - [PYRG1_HUMAN]	66.648	14.89	2	9	9	46	1.03786e+08	1.2297e+08	1.2022	-0.153326	12	0.792249	-0.317095	11	1.1311	-0.305633	13	1.53587	-0.0436026	12
O75828	Carbonyl reductase [NADPH] 3 OS=Homo sapiens GN=CBR3 PE=1 SV=3 - [CBR3_HUMAN]	30.8307	5.78	2	1	1	2	1.84114e+06	3.32282e+06	3.22059	1.26833	1	0.854141	-0.208576	1	1.79854	0.363461	1	1.5339	-0.0454594	1
P48735	Isocitrate dehydrogenase [NADP], mitochondrial OS=Homo sapiens GN=IDH2 PE=1 SV=2 - [IDHP_HUMAN]	50.8769	4.87	1	1	2	11	2.38428e+07	1.78281e+07	1.69371	0.341184	1				1.21293	-0.204872	3	1.53209	-0.0471593	2
Q6L8Q7	2',5'-phosphodiesterase 12 OS=Homo sapiens GN=PDE12 PE=1 SV=2 - [PDE12_HUMAN]	67.3089	5.75	1	3	3	21	3.91268e+07	7.3802e+07	1.00844	-0.406873	4	0.960942	-0.0386004	6	1.03193	-0.438025	4	1.5264	-0.0525237	6
Q9BRX2	Protein pelota homolog OS=Homo sapiens GN=PELO PE=1 SV=2 - [PELO_HUMAN]	43.332	26.49	1	10	10	57	1.58386e+08	2.5975e+08	1.21915	-0.133128	20	0.794584	-0.312851	16	1.21618	-0.20101	20	1.52374	-0.0550437	16
Q9UJV9	Probable ATP-dependent RNA helicase DDX41 OS=Homo sapiens GN=DDX41 PE=1 SV=2 - [DDX41_HUMAN]	69.793	21.54	1	15	15	78	9.43328e+07	1.1188e+08	1.31293	-0.0262041	30	0.938428	-0.0728038	21	1.14407	-0.289184	29	1.52299	-0.0557582	21
Q15046	Lysine--tRNA ligase OS=Homo sapiens GN=KARS PE=1 SV=3 - [SYK_HUMAN]	68.0046	10.39	1	7	7	43	1.05506e+08	6.06911e+07	1.69528	0.342522	10	0.717791	-0.459485	10	1.11489	-0.326467	10	1.5223	-0.0564048	10
Q9H9A6	Leucine-rich repeat-containing protein 40 OS=Homo sapiens GN=LRRC40 PE=1 SV=1 - [LRC40_HUMAN]	68.2071	4.98	1	3	3	9	7.11394e+06	1.50546e+07	2.53187	0.921201	1	0.805038	-0.293993	2	1.83477	0.392238	1	1.52127	-0.0573848	2
P05141	ADP/ATP translocase 2 OS=Homo sapiens GN=SLC25A5 PE=1 SV=7 - [ADT2_HUMAN]	32.8312	3.36	3	1	1	4	9.1077e+06	6.96121e+06	1.36358	0.0284019	2	0.898625	-0.135332	2	0.881594	-0.665178	2	1.51996	-0.0586262	2
P51617	Interleukin-1 receptor-associated kinase 1 OS=Homo sapiens GN=IRAK1 PE=1 SV=2 - [IRAK1_HUMAN]	76.4886	1.26	1	1	1	1	0	3.24343e+07				1.5215	0.624369	1				1.51358	-0.0646974	1
Q8TB03	Uncharacterized protein CXorf38 OS=Homo sapiens GN=CXorf38 PE=1 SV=1 - [CX038_HUMAN]	36.6463	3.76	1	1	1	3	6.29307e+06	8.6701e+06	1.04465	-0.355977	2	1.15454	0.226201	1	1.454	0.0566627	2	1.50333	-0.0745013	1
Q15366	Poly(rC)-binding protein 2 OS=Homo sapiens GN=PCBP2 PE=1 SV=1 - [PCBP2_HUMAN]	38.5556	21.37	3	4	9	65	5.99925e+08	687142733	1.38647	0.0524201	5	1.05493	0.0960283	7	1.49013	0.0920723	5	1.50176	-0.0760076	7
P08865	40S ribosomal protein SA OS=Homo sapiens GN=RPSA PE=1 SV=4 - [RSSA_HUMAN]	32.8334	2.71	1	1	1	1	0	6.4768e+07				1.80914	0.87418	1				1.50147	-0.0762871	1
P54750	Calcium/calmodulin-dependent 3',5'-cyclic nucleotide phosphodiesterase 1A OS=Homo sapiens GN=PDE1A PE=2 SV=2 - [PDE1A_HUMAN]	61.213	31.4	2	15	17	465	5.58736e+09	8.39658e+09	0.873886	-0.613482	66	0.604844	-0.706487	61	1.29729	-0.107867	66	1.4955	-0.0820346	59
P43490	Nicotinamide phosphoribosyltransferase OS=Homo sapiens GN=NAMPT PE=1 SV=1 - [NAMPT_HUMAN]	55.4866	1.43	1	1	1	2	0	1.14957e+07				1.04392	0.0808926	1				1.4947	-0.0828042	1
Q99836	Myeloid differentiation primary response protein MyD88 OS=Homo sapiens GN=MYD88 PE=1 SV=1 - [MYD88_HUMAN]	33.212	14.53	1	4	4	27	3.91033e+07	5.8513e+07	1.37593	0.0414122	5	1.08891	0.141769	6	1.35076	-0.0495983	5	1.49258	-0.084852	6
Q9BYB4	Guanine nucleotide-binding protein subunit beta-like protein 1 OS=Homo sapiens GN=GNB1L PE=1 SV=2 - [GNB1L_HUMAN]	35.5951	12.54	1	4	4	10	1.91263e+07	1.87805e+07	1.59779	0.257074	6	1.13767	0.204961	3	1.73746	0.313618	6	1.49255	-0.0848841	3
Q9H3K6	BolA-like protein 2 OS=Homo sapiens GN=BOLA2 PE=1 SV=1 - [BOLA2_HUMAN]	10.1102	26.74	1	2	2	11	1.89474e+08	1.68513e+08	1.2774	-0.065793	5	0.954039	-0.0490026	4	1.33517	-0.0663413	5	1.49025	-0.0871028	4
O00571	ATP-dependent RNA helicase DDX3X OS=Homo sapiens GN=DDX3X PE=1 SV=3 - [DDX3X_HUMAN]	73.198	11.93	2	7	8	31	8.79993e+07	1.31016e+08	1.17204	-0.189978	7	1.44075	0.545694	11	1.01611	-0.460302	7	1.48846	-0.088843	11
P15531	Nucleoside diphosphate kinase A OS=Homo sapiens GN=NME1 PE=1 SV=1 - [NDKA_HUMAN]	17.1377	46.05	1	2	6	28	1.0048e+08	1.81051e+08	1.10319	-0.277316	1	0.735749	-0.423836	2	1.07385	-0.380574	1	1.48821	-0.0890834	2
P46109	Crk-like protein OS=Homo sapiens GN=CRKL PE=1 SV=1 - [CRKL_HUMAN]	33.7559	15.84	1	4	4	20	6.96217e+07	1.16672e+08	1.22784	-0.122877	5	0.734326	-0.426629	7	1.48499	0.0870889	5	1.48556	-0.0916566	7
P62826	GTP-binding nuclear protein Ran OS=Homo sapiens GN=RAN PE=1 SV=3 - [RAN_HUMAN]	24.4076	18.98	1	5	5	25	3.75479e+07	6.26453e+07	1.57297	0.234492	4	1.45118	0.556104	6	2.18567	0.644714	4	1.47795	-0.0990595	6
P05198	Eukaryotic translation initiation factor 2 subunit 1 OS=Homo sapiens GN=EIF2S1 PE=1 SV=3 - [IF2A_HUMAN]	36.0894	14.92	1	5	5	23	4.01954e+07	5.15154e+07	1.43199	0.0990189	9	0.831072	-0.248077	4	1.73203	0.309103	7	1.47576	-0.101202	4
P49585	Choline-phosphate cytidylyltransferase A OS=Homo sapiens GN=PCYT1A PE=1 SV=2 - [PCY1A_HUMAN]	41.7048	7.9	2	3	3	4	0	22603508				0.905212	-0.124795	2				1.47545	-0.10151	2
Q96H79	Zinc finger CCCH-type antiviral protein 1-like OS=Homo sapiens GN=ZC3HAV1L PE=1 SV=2 - [ZCCHL_HUMAN]	32.9405	17.67	1	4	4	6	1.64948e+07	1.13972e+07	4.27918	1.67833	2	0.948418	-0.0575267	1	3.70258	1.40517	2	1.47483	-0.102117	1
O43684	Mitotic checkpoint protein BUB3 OS=Homo sapiens GN=BUB3 PE=1 SV=1 - [BUB3_HUMAN]	37.1312	20.73	1	5	5	10	4.80094e+07	49753064	1.19111	-0.166691	3	1.46437	0.569163	3	1.37299	-0.0260477	3	1.47014	-0.106709	3
P48507	Glutamate--cysteine ligase regulatory subunit OS=Homo sapiens GN=GCLM PE=1 SV=1 - [GSH0_HUMAN]	30.7078	16.42	1	4	4	19	9.92858e+07	1.91821e+08	1.40989	0.0765865	6	1.00168	0.0213032	9	1.57091	0.168238	6	1.46565	-0.111117	9
P24941	Cyclin-dependent kinase 2 OS=Homo sapiens GN=CDK2 PE=1 SV=2 - [CDK2_HUMAN]	33.908	9.73	1	3	3	5	1.2709e+07	2.22196e+07	0.69697	-0.93983	2	0.828901	-0.25185	3	1.16023	-0.268948	2	1.45916	-0.11752	3
Q6NVV1	Putative 60S ribosomal protein L13a-like MGC87657 OS=Homo sapiens PE=5 SV=1 - [R13AX_HUMAN]	12.1269	18.63	2	2	2	9	3.00396e+07	1.63832e+07	2.52392	0.916668	2	0.623778	-0.662017	2	2.77927	0.991343	2	1.4579	-0.118773	2
Q9Y5K5	Ubiquitin carboxyl-terminal hydrolase isozyme L5 OS=Homo sapiens GN=UCHL5 PE=1 SV=3 - [UCHL5_HUMAN]	37.583	24.62	1	7	7	13	4.14744e+07	6.03077e+07	1.34461	0.00818741	3	1.03355	0.0664854	6	1.49097	0.0928844	3	1.45511	-0.121536	7
Q9BY77	Polymerase delta-interacting protein 3 OS=Homo sapiens GN=POLDIP3 PE=1 SV=2 - [PDIP3_HUMAN]	46.0605	3.09	1	1	1	1	0	1.63042e+07										1.45374	-0.122894	1
Q15233	Non-POU domain-containing octamer-binding protein OS=Homo sapiens GN=NONO PE=1 SV=4 - [NONO_HUMAN]	54.1973	1.7	2	1	1	3	4.41976e+07	3.38517e+07	0.972655	-0.459	2	1.17932	0.256836	1	0.927867	-0.591374	2	1.44005	-0.136539	1
P68371	Tubulin beta-4B chain OS=Homo sapiens GN=TUBB4B PE=1 SV=1 - [TBB4B_HUMAN]	49.799	23.37	6	2	9	152	3.63373e+08	6.1939e+08	1.3412	0.00452794	5	0.924844	-0.0938405	6	1.44113	0.0438392	5	1.43524	-0.141371	6
P35080	Profilin-2 OS=Homo sapiens GN=PFN2 PE=1 SV=3 - [PROF2_HUMAN]	15.0363	15.71	1	2	2	12	7.57863e+07	2.45601e+08	1.23263	-0.117263	2	0.890622	-0.148236	4	1.48472	0.0868249	2	1.43165	-0.144983	4
P22314	Ubiquitin-like modifier-activating enzyme 1 OS=Homo sapiens GN=UBA1 PE=1 SV=3 - [UBA1_HUMAN]	117.774	4.73	1	5	5	23	1.43815e+07	1.9657e+07	1.59114	0.251064	5	1.39451	0.498633	6	1.31809	-0.0849186	5	1.42925	-0.147399	6
P35268	60S ribosomal protein L22 OS=Homo sapiens GN=RPL22 PE=1 SV=2 - [RL22_HUMAN]	14.7778	10.16	1	1	1	14	1.16089e+08	1.372e+08	1.3203	-0.0181366	3	0.891279	-0.147173	2	1.36906	-0.0301794	3	1.42067	-0.156087	2
P54136	Arginine--tRNA ligase, cytoplasmic OS=Homo sapiens GN=RARS PE=1 SV=2 - [SYRC_HUMAN]	75.3309	18.79	1	11	11	52	1.50441e+08	1.82223e+08	1.44602	0.113088	16	0.710978	-0.473244	13	1.20922	-0.209293	16	1.41498	-0.161881	16
P30740	Leukocyte elastase inhibitor OS=Homo sapiens GN=SERPINB1 PE=1 SV=1 - [ILEU_HUMAN]	42.7147	32.98	1	15	15	110	4.59435e+08	7.07838e+08	1.37744	0.0429926	27	0.96918	-0.0262847	30	1.51546	0.116392	27	1.40966	-0.167311	31
O15067	Phosphoribosylformylglycinamidine synthase OS=Homo sapiens GN=PFAS PE=1 SV=4 - [PUR4_HUMAN]	144.643	1.05	1	1	1	1	0	5.48839e+06				1.07794	0.12716	1				1.4078	-0.169218	1
O60547	GDP-mannose 4,6 dehydratase OS=Homo sapiens GN=GMDS PE=1 SV=1 - [GMDS_HUMAN]	41.9233	20.16	1	8	8	31	9.65677e+07	1.13584e+08	1.27439	-0.0691961	8	0.806316	-0.291704	8	1.44779	0.0504889	8	1.4075	-0.16953	8
Q9BUP3	Oxidoreductase HTATIP2 OS=Homo sapiens GN=HTATIP2 PE=1 SV=2 - [HTAI2_HUMAN]	27.032	9.09	1	2	2	2	0	1.58209e+07				0.59681	-0.725779	2				1.40583	-0.17124	2
Q9NUI1	Peroxisomal 2,4-dienoyl-CoA reductase OS=Homo sapiens GN=DECR2 PE=1 SV=1 - [DECR2_HUMAN]	30.758	32.19	1	9	9	44	1.94312e+08	1.2299e+08	1.3174	-0.0213104	16	0.947163	-0.0594376	12	1.31221	-0.0913656	16	1.40125	-0.175952	12
P53602	Diphosphomevalonate decarboxylase OS=Homo sapiens GN=MVD PE=1 SV=1 - [MVD1_HUMAN]	43.3772	4.75	1	2	2	8	2.59966e+07	3.62074e+07	2.18466	0.708412	3	1.19858	0.280199	2	1.9024	0.444457	3	1.40017	-0.177055	2
O75874	Isocitrate dehydrogenase [NADP] cytoplasmic OS=Homo sapiens GN=IDH1 PE=1 SV=2 - [IDHC_HUMAN]	46.6295	5.31	1	1	2	6	1.17731e+07	5.58375e+06				1.37275	0.475946	2				1.40016	-0.177065	2
P60891	Ribose-phosphate pyrophosphokinase 1 OS=Homo sapiens GN=PRPS1 PE=1 SV=2 - [PRPS1_HUMAN]	34.8119	9.43	3	3	3	9	2.49363e+07	2.09235e+07	1.40826	0.0749134	3	0.913081	-0.112307	2	1.93275	0.467293	6	1.3986	-0.178676	2
O60885	Bromodomain-containing protein 4 OS=Homo sapiens GN=BRD4 PE=1 SV=2 - [BRD4_HUMAN]	152.124	11.89	3	13	17	117	3.91376e+08	4.90652e+08	0.458565	-1.5438	33	0.355693	-1.47242	13	1.05507	-0.406027	33	1.39799	-0.179307	17
P62913	60S ribosomal protein L11 OS=Homo sapiens GN=RPL11 PE=1 SV=2 - [RL11_HUMAN]	20.2396	16.85	1	3	3	21	1.70776e+08	9.76208e+07	1.23244	-0.117482	7	0.846664	-0.22126	4	1.46591	0.0684315	7	1.39592	-0.181441	3
P04080	Cystatin-B OS=Homo sapiens GN=CSTB PE=1 SV=2 - [CYTB_HUMAN]	11.1326	24.49	1	2	2	32	1.8885e+08	3.08898e+08	1.29477	-0.0463014	7	0.983412	-0.00525435	5	1.94536	0.476671	6	1.39472	-0.182682	5
Q9P2J3	Kelch-like protein 9 OS=Homo sapiens GN=KLHL9 PE=1 SV=2 - [KLHL9_HUMAN]	69.3832	23.66	1	4	14	53	1.44862e+08	1.43955e+08	1.27208	-0.071812	4	0.469594	-1.07164	1	1.06842	-0.387881	4	1.38524	-0.192524	2
P21281	V-type proton ATPase subunit B, brain isoform OS=Homo sapiens GN=ATP6V1B2 PE=1 SV=3 - [VATB2_HUMAN]	56.4649	5.09	1	2	2	7	4.11287e+06	8.12823e+06	1.69432	0.341706	2	0.678308	-0.54111	2	2.24514	0.683439	2	1.38054	-0.197427	3
P06748	Nucleophosmin OS=Homo sapiens GN=NPM1 PE=1 SV=2 - [NPM_HUMAN]	32.5548	9.86	1	3	3	17	1.32045e+08	1.65026e+08	1.43363	0.100672	5	1.09945	0.15566	4	1.6328	0.223987	5	1.37564	-0.202555	4
Q15370	Transcription elongation factor B polypeptide 2 OS=Homo sapiens GN=TCEB2 PE=1 SV=1 - [ELOB_HUMAN]	13.1246	21.19	1	3	3	11	2.27069e+07	2.3038e+07	1.08219	-0.305048	2	0.456552	-1.11227	3	1.14979	-0.281994	2	1.36837	-0.210207	3
Q14204	Cytoplasmic dynein 1 heavy chain 1 OS=Homo sapiens GN=DYNC1H1 PE=1 SV=5 - [DYHC1_HUMAN]	532.072	1.29	1	7	7	24	1.44942e+07	2.18037e+07	1.15073	-0.216447	6	1.51997	0.622918	7	2.92812	1.06661	6	1.36768	-0.210935	7
Q9H479	Fructosamine-3-kinase OS=Homo sapiens GN=FN3K PE=1 SV=1 - [FN3K_HUMAN]	35.1489	27.51	1	9	9	78	2.72993e+08	3.34939e+08	1.40012	0.0665529	17	0.840712	-0.231438	15	1.49335	0.095184	17	1.36275	-0.216136	15
Q9HBL8	NmrA-like family domain-containing protein 1 OS=Homo sapiens GN=NMRAL1 PE=1 SV=1 - [NMRL1_HUMAN]	33.3233	14.38	1	4	4	20	4.65911e+07	3.27784e+07	1.29305	-0.0482191	8	0.480338	-1.039	3	1.33466	-0.0668946	8	1.3605	-0.21852	4
Q63HN8	E3 ubiquitin-protein ligase RNF213 OS=Homo sapiens GN=RNF213 PE=1 SV=3 - [RN213_HUMAN]	591.03	0.17	1	1	1	2	30998927	34500797				0.978793	-0.0120457	1				1.34848	-0.231329	1
Q96DG6	Carboxymethylenebutenolidase homolog OS=Homo sapiens GN=CMBL PE=1 SV=1 - [CMBL_HUMAN]	28.0302	28.98	1	9	9	129	7.77083e+08	1.51757e+09	1.12415	-0.250161	23	0.820356	-0.266799	24	1.38816	-0.0101898	22	1.34823	-0.231592	23
P27707	Deoxycytidine kinase OS=Homo sapiens GN=DCK PE=1 SV=1 - [DCK_HUMAN]	30.4991	3.08	1	1	1	1	0	14154370				0.513148	-0.943675	1				1.32722	-0.254253	1
Q9H773	dCTP pyrophosphatase 1 OS=Homo sapiens GN=DCTPP1 PE=1 SV=1 - [DCTP1_HUMAN]	18.6694	13.53	1	2	2	4	3.42786e+07	3.32342e+07				0.0780124	-3.66128	1				1.32612	-0.255455	1
P48643	T-complex protein 1 subunit epsilon OS=Homo sapiens GN=CCT5 PE=1 SV=1 - [TCPE_HUMAN]	59.6328	4.81	1	3	3	7	6.73521e+06	1.89e+07				1.14327	0.212039	3				1.32588	-0.255711	4
Q32P51	Heterogeneous nuclear ribonucleoprotein A1-like 2 OS=Homo sapiens GN=HNRNPA1L2 PE=2 SV=2 - [RA1L2_HUMAN]	34.2043	4.06	2	1	1	2	16130657	34610213	0.991692	-0.431035	1	0.905353	-0.124569	1	1.42619	0.0288067	1	1.32427	-0.257467	1
P55265	Double-stranded RNA-specific adenosine deaminase OS=Homo sapiens GN=ADAR PE=1 SV=4 - [DSRAD_HUMAN]	135.981	2.2	1	3	3	9	1.18126e+07	2.56376e+07	0.930663	-0.522669	3	1.30955	0.407949	3	5.06723	1.85783	3	1.32347	-0.258334	3
P14868	Aspartate--tRNA ligase, cytoplasmic OS=Homo sapiens GN=DARS PE=1 SV=2 - [SYDC_HUMAN]	57.1	41.12	1	19	19	87	1.63334e+08	2.5877e+08	1.46459	0.1315	25	0.722087	-0.450877	18	1.29939	-0.105529	23	1.32245	-0.259453	18
Q9Y233	cAMP and cAMP-inhibited cGMP 3',5'-cyclic phosphodiesterase 10A OS=Homo sapiens GN=PDE10A PE=1 SV=1 - [PDE10_HUMAN]	88.3556	14.51	1	10	10	63	2.59067e+08	3.52033e+08	0.018678	-6.16151	2	0.210026	-2.23248	10	1.16845	-0.258765	4	1.32205	-0.259889	13
P23258	Tubulin gamma-1 chain OS=Homo sapiens GN=TUBG1 PE=1 SV=2 - [TBG1_HUMAN]	51.1378	2	2	1	1	4	6.09019e+07	45745383	5.74489	2.10328	1	3.36034	1.76749	1	1.55498	0.153528	1	1.31722	-0.26516	1
Q15059	Bromodomain-containing protein 3 OS=Homo sapiens GN=BRD3 PE=1 SV=1 - [BRD3_HUMAN]	79.4921	16.39	2	7	11	80	3.08123e+08	3.82503e+08	0.60752	-1.138	13	0.150403	-2.71421	11	0.95052	-0.556576	11	1.31548	-0.267075	12
P49841	Glycogen synthase kinase-3 beta OS=Homo sapiens GN=GSK3B PE=1 SV=2 - [GSK3B_HUMAN]	46.7149	13.33	1	4	6	17	1.25044e+08	1.44103e+08	1.46355	0.13047	2	0.962774	-0.035853	4	1.76238	0.334159	2	1.31321	-0.269566	4
Q9NSD9	Phenylalanine--tRNA ligase beta subunit OS=Homo sapiens GN=FARSB PE=1 SV=3 - [SYFB_HUMAN]	66.0735	14.6	1	9	9	35	6.72866e+07	8.48384e+07	1.49919	0.165184	9	1	0.018878	16	1.08377	-0.367303	9	1.31138	-0.271578	16
Q9Y3F4	Serine-threonine kinase receptor-associated protein OS=Homo sapiens GN=STRAP PE=1 SV=1 - [STRAP_HUMAN]	38.414	16.57	1	5	5	30	3.12747e+07	6.58207e+07	0.598	-1.16078	4	0.36014	-1.45449	2	1.91037	0.450485	4	1.30992	-0.273185	2
Q14232	Translation initiation factor eIF-2B subunit alpha OS=Homo sapiens GN=EIF2B1 PE=1 SV=1 - [EI2BA_HUMAN]	33.6908	2.95	1	1	1	1	0	32388364				0.708819	-0.477632	1				1.30821	-0.275067	1
P08237	6-phosphofructokinase, muscle type OS=Homo sapiens GN=PFKM PE=1 SV=2 - [K6PF_HUMAN]	85.1284	6.41	1	2	4	18	2.07993e+07	5.31329e+07	1.1056	-0.274173	4	0.954224	-0.0487226	1	1.16405	-0.264206	4	1.30654	-0.276906	1
Q9UJ70	N-acetyl-D-glucosamine kinase OS=Homo sapiens GN=NAGK PE=1 SV=4 - [NAGK_HUMAN]	37.3519	3.2	1	1	1	3	7.49863e+06	1.81457e+07										1.306	-0.27751	1
Q15459	Splicing factor 3A subunit 1 OS=Homo sapiens GN=SF3A1 PE=1 SV=1 - [SF3A1_HUMAN]	88.8305	1.64	1	1	1	3	9.67042e+06	1.59526e+07	1.19039	-0.167562	1	0.801501	-0.300347	2	1.10813	-0.335232	1	1.30451	-0.279152	2
P04183	Thymidine kinase, cytosolic OS=Homo sapiens GN=TK1 PE=1 SV=2 - [KITH_HUMAN]	25.452	18.8	1	4	4	19	2.71859e+07	2.37784e+07	0.809734	-0.72348	5	0.800788	-0.30163	6	1.11521	-0.326044	4	1.30351	-0.28026	6
Q96CN7	Isochorismatase domain-containing protein 1 OS=Homo sapiens GN=ISOC1 PE=1 SV=3 - [ISOC1_HUMAN]	32.2161	10.07	1	4	4	17	4.31367e+07	5.24199e+07	1.0676	-0.324627	5	0.829553	-0.250716	4	1.06421	-0.393586	5	1.29898	-0.285281	4
P62081	40S ribosomal protein S7 OS=Homo sapiens GN=RPS7 PE=1 SV=1 - [RS7_HUMAN]	22.1133	13.4	1	3	3	17	1.01318e+08	205606682	1.34197	0.00535765	5	0.804418	-0.295105	2	1.51852	0.119302	5	1.29449	-0.290273	2
Q9UHX1	Poly(U)-binding-splicing factor PUF60 OS=Homo sapiens GN=PUF60 PE=1 SV=1 - [PUF60_HUMAN]	59.8376	16.1	1	8	8	54	1.54187e+08	2.13111e+08	1.12474	-0.249408	14	0.828069	-0.253299	16	1.00566	-0.475222	14	1.29252	-0.292476	15
Q9UBV8	Peflin OS=Homo sapiens GN=PEF1 PE=1 SV=1 - [PEF1_HUMAN]	30.3613	13.03	1	5	5	41	366007545	5.4155e+08	1.22494	-0.126286	11	0.839442	-0.23362	10	1.28894	-0.117179	11	1.29124	-0.293907	10
Q06203	Amidophosphoribosyltransferase OS=Homo sapiens GN=PPAT PE=1 SV=1 - [PUR1_HUMAN]	57.3624	5.61	1	2	2	7	1.33045e+07	22971358	1.21899	-0.133315	4	0.726994	-0.441107	2	1.11558	-0.325568	4	1.29014	-0.295136	2
P47897	Glutamine--tRNA ligase OS=Homo sapiens GN=QARS PE=1 SV=1 - [SYQ_HUMAN]	87.7429	20.77	1	14	14	109	1.18684e+08	1.6362e+08	1.30586	-0.033998	26	0.763626	-0.370184	21	1.21721	-0.199781	28	1.29005	-0.295234	22
P43246	DNA mismatch repair protein Msh2 OS=Homo sapiens GN=MSH2 PE=1 SV=1 - [MSH2_HUMAN]	104.677	3.75	1	4	4	17	13843692	1.20153e+07				1.01611	0.041938	1				1.28831	-0.297182	1
P55060	Exportin-2 OS=Homo sapiens GN=CSE1L PE=1 SV=3 - [XPO2_HUMAN]	110.346	4.22	1	4	4	13	1.34123e+07	2.78401e+07	2.68826	1.00767	4	0.870671	-0.180923	5	1.71996	0.299008	4	1.28536	-0.300491	5
Q99714	3-hydroxyacyl-CoA dehydrogenase type-2 OS=Homo sapiens GN=HSD17B10 PE=1 SV=3 - [HCD2_HUMAN]	26.9061	22.22	1	5	5	13	2.13259e+07	6.85536e+06	1.20383	-0.151367	5	0.958728	-0.0419282	1	1.38137	-0.0172624	8	1.27651	-0.31046	2
P11586	C-1-tetrahydrofolate synthase, cytoplasmic OS=Homo sapiens GN=MTHFD1 PE=1 SV=3 - [C1TC_HUMAN]	101.495	22.03	1	18	18	83	7.19897e+07	1.06241e+08	1.30831	-0.0312946	26	1.00397	0.0245936	26	1.25854	-0.151619	26	1.2762	-0.310811	26
P49327	Fatty acid synthase OS=Homo sapiens GN=FASN PE=1 SV=3 - [FAS_HUMAN]	273.254	7.93	1	19	19	92	5.64958e+07	7.60627e+07	1.0845	-0.301968	28	1.13164	0.197288	23	1.56392	0.161799	27	1.27362	-0.31373	22
P07437	Tubulin beta chain OS=Homo sapiens GN=TUBB PE=1 SV=2 - [TBB5_HUMAN]	49.639	30.63	5	2	11	158	4.95415e+08	9.10457e+08	1.03798	-0.365219	2	0.784275	-0.331691	5	1.27681	-0.130824	2	1.27309	-0.314322	5
Q14527	Helicase-like transcription factor OS=Homo sapiens GN=HLTF PE=1 SV=2 - [HLTF_HUMAN]	113.857	4.56	1	5	5	28	4.95619e+07	5.29671e+07	1.14648	-0.221782	11	1.14018	0.208144	7	1.14126	-0.292737	11	1.2729	-0.314538	7
P46940	Ras GTPase-activating-like protein IQGAP1 OS=Homo sapiens GN=IQGAP1 PE=1 SV=1 - [IQGA1_HUMAN]	189.134	13.22	3	21	21	80	6.59194e+07	8.9132e+07	1.33341	-0.00388165	23	1.16179	0.235224	27	1.31622	-0.0869609	21	1.2688	-0.319191	27
P56192	Methionine--tRNA ligase, cytoplasmic OS=Homo sapiens GN=MARS PE=1 SV=2 - [SYMC_HUMAN]	101.052	7.78	1	7	7	16	7.43648e+07	7.85149e+07	2.09329	0.64677	6	0.501165	-0.977765	6	1.01093	-0.467679	6	1.26139	-0.32765	6
O60716	Catenin delta-1 OS=Homo sapiens GN=CTNND1 PE=1 SV=1 - [CTND1_HUMAN]	108.103	4.86	1	4	4	11	8.98253e+06	1.56134e+07	3.04336	1.18667	3	0.678583	-0.540526	4	1.708	0.288944	3	1.25855	-0.330899	3
P68366	Tubulin alpha-4A chain OS=Homo sapiens GN=TUBA4A PE=1 SV=1 - [TBA4A_HUMAN]	49.8924	19.87	3	2	9	56	3.6527e+08	6.21915e+08	0.887515	-0.591156	3	0.961994	-0.0370223	3	1.11732	-0.323328	2	1.2579	-0.331639	3
P28074	Proteasome subunit beta type-5 OS=Homo sapiens GN=PSMB5 PE=1 SV=3 - [PSB5_HUMAN]	28.4622	3.8	1	1	1	3	3.62985e+06	9.61667e+06	0.84121	-0.668462	1				0.858215	-0.703953	1	1.25508	-0.334877	2
Q8TD19	Serine/threonine-protein kinase Nek9 OS=Homo sapiens GN=NEK9 PE=1 SV=2 - [NEK9_HUMAN]	107.1	1.94	1	2	2	3	5.65333e+06	8.06939e+06	2.99004	1.16116	1	0.837306	-0.237296	1				1.25502	-0.334951	1
Q13868	Exosome complex component RRP4 OS=Homo sapiens GN=EXOSC2 PE=1 SV=2 - [EXOS2_HUMAN]	32.7681	3.75	1	1	1	6	2.37611e+07	38817017	1.42863	0.0956312	3	0.99874	0.0170587	2	1.4757	0.0780364	3	1.25452	-0.335525	2
Q8TEQ6	Gem-associated protein 5 OS=Homo sapiens GN=GEMIN5 PE=1 SV=3 - [GEMI5_HUMAN]	168.483	0.73	1	1	1	2	0	15097608				1.19317	0.273681	2				1.25354	-0.336648	2
P49915	GMP synthase [glutamine-hydrolyzing] OS=Homo sapiens GN=GMPS PE=1 SV=1 - [GUAA_HUMAN]	76.667	9.67	1	7	7	21	3.70954e+07	4.82608e+07	1.41533	0.0821375	3	0.532308	-0.89079	6	2.22786	0.672292	2	1.2505	-0.340151	6
P0CG48	Polyubiquitin-C OS=Homo sapiens GN=UBC PE=1 SV=3 - [UBC_HUMAN]	76.9915	60.44	4	5	5	30	1.12772e+08	1.44254e+08	1.08037	-0.307475	6	0.838682	-0.234927	9	1.09328	-0.354698	6	1.2501	-0.34062	9
Q5T6F2	Ubiquitin-associated protein 2 OS=Homo sapiens GN=UBAP2 PE=1 SV=1 - [UBAP2_HUMAN]	117.044	1.34	1	1	1	6	1.16117e+07	5.42418e+06	1.47103	0.137826	3	0.601841	-0.713668	1	1.02282	-0.450812	3	1.2463	-0.345015	1
P56537	Eukaryotic translation initiation factor 6 OS=Homo sapiens GN=EIF6 PE=1 SV=1 - [IF6_HUMAN]	26.5822	4.08	1	1	1	11	2.2723e+07	2.70986e+07	1.28067	-0.0620976	3	0.908759	-0.119153	3	1.11761	-0.322948	3	1.24572	-0.345679	3
P30050	60S ribosomal protein L12 OS=Homo sapiens GN=RPL12 PE=1 SV=1 - [RL12_HUMAN]	17.8075	15.15	1	2	2	10	2.66348e+08	1.61418e+08	1.45052	0.117575	3	0.875135	-0.173545	2	1.51751	0.118342	3	1.24471	-0.346852	2
P51692	Signal transducer and activator of transcription 5B OS=Homo sapiens GN=STAT5B PE=1 SV=2 - [STA5B_HUMAN]	89.8096	3.94	2	3	3	8	1.55051e+07	2.37751e+07	4.12313	1.62474	1	0.834132	-0.242774	4	0.818021	-0.773155	1	1.24245	-0.349473	4
Q15365	Poly(rC)-binding protein 1 OS=Homo sapiens GN=PCBP1 PE=1 SV=2 - [PCBP1_HUMAN]	37.4739	30.34	3	5	10	67	7.45784e+08	1.44435e+09	1.25346	-0.0930868	6	0.893777	-0.143135	11	1.38722	-0.0111687	7	1.23931	-0.353118	11
Q13162	Peroxiredoxin-4 OS=Homo sapiens GN=PRDX4 PE=1 SV=1 - [PRDX4_HUMAN]	30.5208	19.93	1	3	6	84	1.56727e+09	2.70117e+09	1.29554	-0.0454463	9	0.794133	-0.31367	8	1.32214	-0.0804874	9	1.2379	-0.35477	8
P25786	Proteasome subunit alpha type-1 OS=Homo sapiens GN=PSMA1 PE=1 SV=1 - [PSA1_HUMAN]	29.5369	6.46	1	2	2	9	2.69504e+07	52839087	0.907725	-0.558672	2	0.884145	-0.158767	4	1.08961	-0.359555	2	1.23631	-0.356622	4
Q9H7Z7	Prostaglandin E synthase 2 OS=Homo sapiens GN=PTGES2 PE=1 SV=1 - [PGES2_HUMAN]	41.9167	5.31	1	2	2	2	1.42604e+07	1.83555e+07				0.696234	-0.503477	1				1.23144	-0.362319	1
P08107	Heat shock 70 kDa protein 1A/1B OS=Homo sapiens GN=HSPA1A PE=1 SV=5 - [HSP71_HUMAN]	70.009	22.62	4	10	14	93	2.13312e+08	314682890	0.945114	-0.50044	16	0.678171	-0.541401	13	0.831258	-0.749996	16	1.23038	-0.363553	13
P35573	Glycogen debranching enzyme OS=Homo sapiens GN=AGL PE=1 SV=3 - [GDE_HUMAN]	174.652	5.68	1	8	8	34	2.50779e+07	1.93117e+07	1.41851	0.0853738	12	0.9077	-0.120835	7	1.33919	-0.0620035	13	1.22764	-0.366773	6
O75694	Nuclear pore complex protein Nup155 OS=Homo sapiens GN=NUP155 PE=1 SV=1 - [NU155_HUMAN]	155.1	10.14	1	11	11	57	5.23896e+07	5.51403e+07	1.26604	-0.0786716	16	1.03573	0.06952	15	1.11061	-0.332015	18	1.22735	-0.367118	15
P16083	Ribosyldihydronicotinamide dehydrogenase [quinone] OS=Homo sapiens GN=NQO2 PE=1 SV=5 - [NQO2_HUMAN]	25.902	45.45	1	9	9	90	1.21901e+09	1.59297e+09	0.0352299	-5.24606	10	0.0101555	-6.60272	18	1.43004	0.0326933	15	1.22562	-0.369154	28
P78347	General transcription factor II-I OS=Homo sapiens GN=GTF2I PE=1 SV=2 - [GTF2I_HUMAN]	112.346	4.21	1	4	4	14	9.50134e+06	1.23965e+07	1.09588	-0.286908	2	0.290498	-1.76452	3	1.11462	-0.326816	1	1.2239	-0.371178	3
Q9HA64	Ketosamine-3-kinase OS=Homo sapiens GN=FN3KRP PE=1 SV=2 - [KT3K_HUMAN]	34.3902	43.04	1	15	15	325	2.24689e+10	3.03298e+10	1.41758	0.0844303	71	0.512308	-0.946038	45	1.40978	0.0121063	73	1.22085	-0.374771	46
Q92947	Glutaryl-CoA dehydrogenase, mitochondrial OS=Homo sapiens GN=GCDH PE=1 SV=1 - [GCDH_HUMAN]	48.0964	2.74	1	1	1	4	23809577	1.41203e+07	1.6036	0.262314	2	1.17463	0.25109	1	1.80598	0.369417	2	1.21872	-0.37729	1
O00764	Pyridoxal kinase OS=Homo sapiens GN=PDXK PE=1 SV=1 - [PDXK_HUMAN]	35.0799	33.65	1	13	13	671	2.53304e+10	4.31402e+10	1.12726	-0.246175	74	0.570604	-0.79056	80	1.26433	-0.144993	76	1.21594	-0.380591	77
Q9NR30	Nucleolar RNA helicase 2 OS=Homo sapiens GN=DDX21 PE=1 SV=5 - [DDX21_HUMAN]	87.2904	2.55	1	2	2	4	8.50882e+06	5.13522e+06	1.97391	0.562054	2	1.2972	0.394279	1	2.80183	1.00301	1	1.21172	-0.385607	1
P49368	T-complex protein 1 subunit gamma OS=Homo sapiens GN=CCT3 PE=1 SV=4 - [TCPG_HUMAN]	60.4953	3.85	1	2	2	13	1.58703e+07	1.63563e+07	1.04781	-0.351628	5	1.15707	0.229359	4	0.832223	-0.748322	5	1.18946	-0.412351	4
P23396	40S ribosomal protein S3 OS=Homo sapiens GN=RPS3 PE=1 SV=2 - [RS3_HUMAN]	26.6714	32.51	1	9	9	51	5.46386e+07	9.33113e+07	1.05435	-0.342649	14	0.871588	-0.179403	18	1.48455	0.0866569	15	1.18946	-0.41236	18
P17844	Probable ATP-dependent RNA helicase DDX5 OS=Homo sapiens GN=DDX5 PE=1 SV=1 - [DDX5_HUMAN]	69.1047	17.75	1	7	11	46	7.99067e+07	1.15896e+08	1.24285	-0.105351	5	1.05684	0.0986369	9	1.37466	-0.0242868	5	1.18931	-0.412533	9
O95551	Tyrosyl-DNA phosphodiesterase 2 OS=Homo sapiens GN=TDP2 PE=1 SV=1 - [TYDP2_HUMAN]	40.9032	8.56	1	3	3	5	0	9.15771e+06				0.882485	-0.161478	4				1.18017	-0.423665	4
P62701	40S ribosomal protein S4, X isoform OS=Homo sapiens GN=RPS4X PE=1 SV=2 - [RS4X_HUMAN]	29.5791	7.22	3	3	3	6	3.37729e+07	2.7362e+07	1.35348	0.0176691	3	0.905543	-0.124267	1	1.33718	-0.064171	3	1.17992	-0.423978	1
P05388	60S acidic ribosomal protein P0 OS=Homo sapiens GN=RPLP0 PE=1 SV=1 - [RLA0_HUMAN]	34.2518	27.44	2	9	9	71	2.6817e+08	3.79389e+08	1.17255	-0.189347	16	0.65886	-0.583078	15	1.34458	-0.0562053	16	1.17905	-0.425036	15
P40616	ADP-ribosylation factor-like protein 1 OS=Homo sapiens GN=ARL1 PE=1 SV=1 - [ARL1_HUMAN]	20.4044	11.05	1	2	2	10	3.20074e+07	1.37247e+08	1.01338	-0.399829	4	0.677288	-0.543281	2	1.2402	-0.172789	4	1.17654	-0.428111	2
P11142	Heat shock cognate 71 kDa protein OS=Homo sapiens GN=HSPA8 PE=1 SV=1 - [HSP7C_HUMAN]	70.8542	29.26	2	14	18	128	2.65813e+08	3.43308e+08	0.945949	-0.499165	21	0.650989	-0.600418	23	0.944985	-0.565	22	1.17416	-0.431037	24
Q96JP2	Unconventional myosin-XVB OS=Homo sapiens GN=MYO15B PE=1 SV=2 - [MY15B_HUMAN]	167.013	2.48	1	3	3	20	8.71889e+06	1.45087e+07	1.20312	-0.152221	3	0.91986	-0.101636	5	1.05809	-0.401901	5	1.16974	-0.436474	5
Q9NQZ5	StAR-related lipid transfer protein 7, mitochondrial OS=Homo sapiens GN=STARD7 PE=1 SV=2 - [STAR7_HUMAN]	43.0857	8.65	1	3	3	10	5.95855e+07	1.04121e+08	1.17102	-0.191239	5	0.809368	-0.286254	2	1.31584	-0.0873759	5	1.1686	-0.437878	2
P07814	Bifunctional glutamate/proline--tRNA ligase OS=Homo sapiens GN=EPRS PE=1 SV=5 - [SYEP_HUMAN]	170.483	14.55	1	22	22	118	2.66911e+08	1.72597e+08	1.42732	0.0943056	41	0.710262	-0.474699	21	1.05216	-0.410016	40	1.16857	-0.437919	23
P02768	Serum albumin OS=Homo sapiens GN=ALB PE=1 SV=2 - [ALBU_HUMAN]	69.3215	5.58	1	3	3	44	598220750	1.51648e+09	1.30909	-0.0304389	5	2.9512	1.58018	8	1.25918	-0.150879	5	1.1683	-0.438256	8
P40938	Replication factor C subunit 3 OS=Homo sapiens GN=RFC3 PE=1 SV=2 - [RFC3_HUMAN]	40.5299	10.39	1	3	3	10	8.42765e+06	1.04908e+07	0.764413	-0.806576	5	0.448198	-1.13891	3	1.47596	0.0782847	5	1.168	-0.43862	3
P60842	Eukaryotic initiation factor 4A-I OS=Homo sapiens GN=EIF4A1 PE=1 SV=1 - [IF4A1_HUMAN]	46.1246	18.23	2	6	6	47	5.34734e+07	8.07832e+07	1.58515	0.245618	13	1.47533	0.579916	13	1.50706	0.108374	13	1.1671	-0.439728	13
P04264	Keratin, type II cytoskeletal 1 OS=Homo sapiens GN=KRT1 PE=1 SV=6 - [K2C1_HUMAN]	65.999	43.79	1	22	27	539	2.71393e+09	2.6967e+09	0.734331	-0.864497	76	0.728634	-0.437855	66	0.788503	-0.826176	75	1.15712	-0.452119	66
P35250	Replication factor C subunit 2 OS=Homo sapiens GN=RFC2 PE=1 SV=3 - [RFC2_HUMAN]	39.1321	2.26	1	1	1	1	0	1.69877e+07				0.855111	-0.206939	1				1.15176	-0.458825	1
Q12874	Splicing factor 3A subunit 3 OS=Homo sapiens GN=SF3A3 PE=1 SV=1 - [SF3A3_HUMAN]	58.8123	1.8	1	1	1	3	0	11929159				0.508529	-0.956719	2				1.15158	-0.459052	2
P32969	60S ribosomal protein L9 OS=Homo sapiens GN=RPL9 PE=1 SV=1 - [RL9_HUMAN]	21.8498	8.85	1	2	2	8	3.27584e+07	3.10029e+07	1.20189	-0.153697	4	0.983045	-0.0057919	1	1.45955	0.0621605	4	1.14892	-0.462384	1
Q12905	Interleukin enhancer-binding factor 2 OS=Homo sapiens GN=ILF2 PE=1 SV=2 - [ILF2_HUMAN]	43.0352	2.56	1	1	1	1	0	1.04826e+07				1.01385	0.0387154	1				1.14846	-0.462961	1
P26640	Valine--tRNA ligase OS=Homo sapiens GN=VARS PE=1 SV=4 - [SYVC_HUMAN]	140.387	3.01	1	3	3	11	1.93626e+07	1.18793e+07	1.44447	0.111545	3	0.729259	-0.436619	2	1.44658	0.0492805	3	1.14523	-0.467026	2
O75340	Programmed cell death protein 6 OS=Homo sapiens GN=PDCD6 PE=1 SV=1 - [PDCD6_HUMAN]	21.8548	34.55	1	7	7	48	221469012	2.9828e+08	1.28837	-0.0534555	15	0.824813	-0.258982	11	1.28581	-0.120682	14	1.14184	-0.471305	11
Q96CP2	FLYWCH family member 2 OS=Homo sapiens GN=FLYWCH2 PE=1 SV=1 - [FWCH2_HUMAN]	14.5545	13.57	1	2	2	4	2.98998e+07	3.40611e+07	2.20421	0.721265	2	1.01575	0.041426	1	2.57611	0.881828	2	1.13318	-0.482286	1
Q9P2N7	Kelch-like protein 13 OS=Homo sapiens GN=KLHL13 PE=1 SV=3 - [KLH13_HUMAN]	73.8198	20.31	1	3	13	63	1.44862e+08	1.45566e+08	1.21454	-0.138595	9	0.498036	-0.986801	5	1.04217	-0.42377	9	1.13252	-0.483126	3
Q6P2E9	Enhancer of mRNA-decapping protein 4 OS=Homo sapiens GN=EDC4 PE=1 SV=1 - [EDC4_HUMAN]	151.567	1.28	1	2	2	3	1.65006e+07	2.37834e+07				0.999546	0.0182225	2				1.12468	-0.493153	2
Q9UKK9	ADP-sugar pyrophosphatase OS=Homo sapiens GN=NUDT5 PE=1 SV=1 - [NUDT5_HUMAN]	24.3122	17.35	1	3	3	7	2.25385e+07	2.55374e+07	1.05161	-0.346406	1	0.802099	-0.29927	3	1.38658	-0.011837	1	1.12313	-0.495131	3
P43355	Melanoma-associated antigen 1 OS=Homo sapiens GN=MAGEA1 PE=1 SV=1 - [MAGA1_HUMAN]	34.3204	5.83	4	2	2	2	1.49963e+07	2.44783e+07	1.31543	-0.0234644	1	0.897228	-0.137575	1				1.11623	-0.504024	1
P13645	Keratin, type I cytoskeletal 10 OS=Homo sapiens GN=KRT10 PE=1 SV=6 - [K1C10_HUMAN]	58.7917	31.85	7	19	22	275	2.1021e+09	5.32056e+09	0.630333	-1.08481	45	1.00356	0.0240033	35	1.1261	-0.312036	46	1.11329	-0.507838	35
P62736	Actin, aortic smooth muscle OS=Homo sapiens GN=ACTA2 PE=1 SV=1 - [ACTA_HUMAN]	41.9818	33.42	5	3	13	155	4.06043e+08	4.12638e+08	1.47961	0.14622	3	0.982836	-0.00609894	3	1.24241	-0.170218	4	1.11139	-0.510299	3
P08727	Keratin, type I cytoskeletal 19 OS=Homo sapiens GN=KRT19 PE=1 SV=4 - [K1C19_HUMAN]	44.0791	14.25	4	1	7	57	8.1883e+08	8.03326e+09	0.142259	-3.23241	1	0.566999	-0.799703	1	0.691107	-1.01638	1	1.10139	-0.523339	1
Q9UBN7	Histone deacetylase 6 OS=Homo sapiens GN=HDAC6 PE=1 SV=2 - [HDAC6_HUMAN]	131.336	7.08	1	9	9	50	125286046	1.68084e+08	1.10478	-0.275236	13	0.446374	-1.1448	12	0.865377	-0.691963	13	1.10091	-0.523967	13
P35527	Keratin, type I cytoskeletal 9 OS=Homo sapiens GN=KRT9 PE=1 SV=3 - [K1C9_HUMAN]	62.0268	34.99	1	16	17	210	1.08708e+09	4.2651e+09	1.10855	-0.27033	46	0.494101	-0.998246	50	0.762305	-0.874924	46	1.10076	-0.524166	51
P53396	ATP-citrate synthase OS=Homo sapiens GN=ACLY PE=1 SV=3 - [ACLY_HUMAN]	120.762	9.45	1	11	11	39	7.46298e+07	3.9243e+07	1.34995	0.0139065	18	0.797997	-0.306668	10	1.16852	-0.258682	17	1.09976	-0.525467	10
P16104	Histone H2AX OS=Homo sapiens GN=H2AFX PE=1 SV=2 - [H2AX_HUMAN]	15.1354	6.29	5	1	1	5	5.25294e+07	2.70032e+07	1.2075	-0.146976	2	0.856384	-0.204792	1	0.924613	-0.596443	2	1.08756	-0.541572	1
Q15393	Splicing factor 3B subunit 3 OS=Homo sapiens GN=SF3B3 PE=1 SV=4 - [SF3B3_HUMAN]	135.492	7.15	1	9	9	59	5.15348e+07	7.80149e+07	1.37582	0.0412942	14	0.809674	-0.285708	18	1.16166	-0.267178	12	1.08039	-0.551115	17
Q9P2J5	Leucine--tRNA ligase, cytoplasmic OS=Homo sapiens GN=LARS PE=1 SV=2 - [SYLC_HUMAN]	134.379	7.74	1	8	8	16	3.75189e+07	5.70014e+07	1.43189	0.0989256	10	0.700926	-0.493789	1	1.09381	-0.354	9	1.08003	-0.551596	1
P61353	60S ribosomal protein L27 OS=Homo sapiens GN=RPL27 PE=1 SV=2 - [RL27_HUMAN]	15.7877	6.62	1	1	1	2	3.19935e+07	2.28295e+07	1.2601	-0.0854651	1	0.675268	-0.54759	1	1.16777	-0.259609	1	1.07236	-0.561872	1
Q13155	Aminoacyl tRNA synthase complex-interacting multifunctional protein 2 OS=Homo sapiens GN=AIMP2 PE=1 SV=2 - [AIMP2_HUMAN]	35.3263	6.25	1	2	2	13	6.23384e+07	7.98662e+07	0.891326	-0.584975	4	0.390262	-1.33861	4	1.06124	-0.397611	3	1.06638	-0.569946	4
P18124	60S ribosomal protein L7 OS=Homo sapiens GN=RPL7 PE=1 SV=1 - [RL7_HUMAN]	29.2072	24.6	1	7	7	27	5.07839e+07	4.53277e+07	1.17653	-0.184464	11	0.81264	-0.280433	7	1.4614	0.0639841	11	1.0591	-0.579821	7
O75818	Ribonuclease P protein subunit p40 OS=Homo sapiens GN=RPP40 PE=1 SV=3 - [RPP40_HUMAN]	41.807	4.13	1	2	2	4	1.04127e+07	1.72944e+07	0.60105	-1.15344	1	0.170471	-2.53352	1	1.13178	-0.304774	1	1.01692	-0.638452	2
P49589	Cysteine--tRNA ligase, cytoplasmic OS=Homo sapiens GN=CARS PE=1 SV=3 - [SYCC_HUMAN]	85.4192	6.68	1	4	4	12	3.01289e+07	2.81716e+07	2.34432	0.810169	5	0.736708	-0.421958	1	1.31416	-0.0892185	5	1.01446	-0.641953	1
P19338	Nucleolin OS=Homo sapiens GN=NCL PE=1 SV=3 - [NUCL_HUMAN]	76.5684	14.93	1	11	11	60	1.41448e+08	1.98893e+08	1.22147	-0.130386	17	0.622255	-0.665543	17	1.24347	-0.168994	16	1.01414	-0.642401	17
Q9H4A4	Aminopeptidase B OS=Homo sapiens GN=RNPEP PE=1 SV=2 - [AMPB_HUMAN]	72.5495	3.38	1	2	2	3	0	1.05702e+07				0.46703	-1.07954	1				1.00809	-0.651035	1
P81605	Dermcidin OS=Homo sapiens GN=DCD PE=1 SV=2 - [DCD_HUMAN]	11.2768	20	1	2	2	11	2.83101e+07	4.91706e+07	0.557357	-1.26233	4	0.928663	-0.0878947	1	1.04527	-0.419489	4	1.00458	-0.656072	2
P15559	NAD(P)H dehydrogenase [quinone] 1 OS=Homo sapiens GN=NQO1 PE=1 SV=1 - [NQO1_HUMAN]	30.848	11.31	1	3	3	23	5.14448e+07	8.44643e+07	0.155503	-3.10398	3	0.102241	-3.27107	3	1.55102	0.149852	2	1.00062	-0.661771	3
Q9BQE3	Tubulin alpha-1C chain OS=Homo sapiens GN=TUBA1C PE=1 SV=1 - [TBA1C_HUMAN]	49.8635	27.62	7	4	11	79	6.48725e+08	1.09158e+09	0.805762	-0.730575	7	0.680075	-0.537357	12	0.924452	-0.596694	6	0.993525	-0.672032	12
O60814	Histone H2B type 1-K OS=Homo sapiens GN=HIST1H2BK PE=1 SV=3 - [H2B1K_HUMAN]	13.8816	15.87	15	2	2	6	8.7093e+06	36945260	1.01625	-0.395742	2	0.76004	-0.376975	1	0.656412	-1.09069	2	0.976047	-0.697639	1
P41252	Isoleucine--tRNA ligase, cytoplasmic OS=Homo sapiens GN=IARS PE=1 SV=2 - [SYIC_HUMAN]	144.406	11.49	1	15	15	96	1.03431e+08	8.25665e+07	1.08826	-0.29698	24	0.683676	-0.529738	23	0.927598	-0.591793	22	0.969131	-0.707898	20
Q00839	Heterogeneous nuclear ribonucleoprotein U OS=Homo sapiens GN=HNRNPU PE=1 SV=6 - [HNRPU_HUMAN]	90.528	3.88	1	3	3	8	2.36519e+07	1.30227e+07	1.74686	0.385762	3	0.72693	-0.441233	2	1.2461	-0.165944	3	0.962793	-0.717364	2
Q7Z4W1	L-xylulose reductase OS=Homo sapiens GN=DCXR PE=1 SV=2 - [DCXR_HUMAN]	25.8966	4.92	1	1	1	10	1.06785e+07	1.51266e+07	1.13612	-0.234885	3	0.711744	-0.471691	3	0.558096	-1.32478	3	0.957325	-0.725581	3
Q00610	Clathrin heavy chain 1 OS=Homo sapiens GN=CLTC PE=1 SV=5 - [CLH1_HUMAN]	191.493	4	2	6	6	15	3.01816e+07	1.98815e+07	1.34746	0.0112476	7	0.843074	-0.22739	4	1.56864	0.166154	7	0.923051	-0.778179	4
O00410	Importin-5 OS=Homo sapiens GN=IPO5 PE=1 SV=4 - [IPO5_HUMAN]	123.55	4.56	1	5	5	29	4.93055e+07	2.88515e+07	0.898098	-0.574054	8	0.721539	-0.451973	6	0.967449	-0.531107	8	0.922868	-0.778465	6
O75521	Enoyl-CoA delta isomerase 2, mitochondrial OS=Homo sapiens GN=ECI2 PE=1 SV=4 - [ECI2_HUMAN]	43.5574	9.14	1	3	3	5	1.49501e+07	2.31289e+06	1.2098	-0.144236	2	1.11002	0.169462	1	1.61364	0.206957	2	0.915735	-0.78966	1
P35908	Keratin, type II cytoskeletal 2 epidermal OS=Homo sapiens GN=KRT2 PE=1 SV=2 - [K22E_HUMAN]	65.3932	40.53	5	17	25	294	1.55748e+09	6.79661e+09	0.689206	-0.955991	39	0.58409	-0.75686	36	1.38058	-0.0180941	39	0.910824	-0.797417	37
Q9GZP4	PITH domain-containing protein 1 OS=Homo sapiens GN=PITHD1 PE=1 SV=1 - [PITH1_HUMAN]	24.1627	9.48	1	2	2	3	0	6.3144e+06				0.0692929	-3.83227	3				0.879777	-0.847451	3
O75153	Clustered mitochondria protein homolog OS=Homo sapiens GN=CLUH PE=1 SV=2 - [CLU_HUMAN]	146.577	3.06	1	4	4	11	1.41985e+07	2.0229e+07	4.16637	1.63979	1	0.351783	-1.48837	1	1.92753	0.46339	1	0.872486	-0.859457	1
Q96P70	Importin-9 OS=Homo sapiens GN=IPO9 PE=1 SV=3 - [IPO9_HUMAN]	115.889	1.15	1	1	1	2	0	5.82409e+06				1.25928	0.351477	1				0.871817	-0.860564	1
P50990	T-complex protein 1 subunit theta OS=Homo sapiens GN=CCT8 PE=1 SV=4 - [TCPQ_HUMAN]	59.5825	4.56	1	2	2	7	1.09705e+07	2.26556e+07	1.26181	-0.0835019	2	0.867237	-0.186625	4	0.967723	-0.530699	2	0.855682	-0.887515	4
Q14157	Ubiquitin-associated protein 2-like OS=Homo sapiens GN=UBAP2L PE=1 SV=2 - [UBP2L_HUMAN]	114.465	0.74	1	1	1	5	7.35815e+06	6.17317e+06	1.0495	-0.349292	2	0.825185	-0.258332	1	1.00995	-0.469079	1	0.849937	-0.897233	1
Q9NW08	DNA-directed RNA polymerase III subunit RPC2 OS=Homo sapiens GN=POLR3B PE=1 SV=2 - [RPC2_HUMAN]	127.702	0.71	1	1	1	1	0	4.76092e+06										0.838033	-0.917582	1
Q08211	ATP-dependent RNA helicase A OS=Homo sapiens GN=DHX9 PE=1 SV=4 - [DHX9_HUMAN]	140.869	3.62	1	5	5	16	9.77278e+06	7.84393e+06	1.42688	0.0938619	3	0.735566	-0.424195	1	1.22379	-0.19201	3	0.820458	-0.948161	1
Q9Y230	RuvB-like 2 OS=Homo sapiens GN=RUVBL2 PE=1 SV=3 - [RUVB2_HUMAN]	51.1246	7.56	1	3	3	20	2.69927e+07	3.37322e+07	0.745766	-0.842205	4	0.588356	-0.74636	5	0.726823	-0.943688	4	0.794364	-0.99479	5
Q9Y265	RuvB-like 1 OS=Homo sapiens GN=RUVBL1 PE=1 SV=1 - [RUVB1_HUMAN]	50.1963	4.82	1	2	2	12	1.60745e+07	5.0736e+07	0.623958	-1.09948	2	0.577163	-0.774071	3	0.64285	-1.12081	2	0.778885	-1.02318	3
P23526	Adenosylhomocysteinase OS=Homo sapiens GN=AHCY PE=1 SV=4 - [SAHH_HUMAN]	47.6852	10.88	1	4	4	16	2.09612e+07	2.13102e+07	1.04749	-0.352058	6	1.02793	0.0586178	3	1.12449	-0.314091	7	0.719267	-1.13806	2
P62158	Calmodulin OS=Homo sapiens GN=CALM1 PE=1 SV=2 - [CALM_HUMAN]	16.8268	30.87	1	3	3	14	1.02887e+08	1.23423e+08	0.706117	-0.92102	4	0.356645	-1.46856	4	1.27923	-0.128084	4	0.709718	-1.15734	4
Q8NEZ5	F-box only protein 22 OS=Homo sapiens GN=FBXO22 PE=1 SV=1 - [FBX22_HUMAN]	44.4798	4.96	1	2	2	4	1.20405e+07	7.30691e+06	1.77174	0.40617	2	0.254807	-1.95365	1	1.15016	-0.281535	2	0.703511	-1.17002	1
Q7Z794	Keratin, type II cytoskeletal 1b OS=Homo sapiens GN=KRT77 PE=2 SV=3 - [K2C1B_HUMAN]	61.8635	9.17	4	2	6	87	1.16219e+09	4.29887e+09				4.19987	2.08922	1				0.692601	-1.19256	1
P45983	Mitogen-activated protein kinase 8 OS=Homo sapiens GN=MAPK8 PE=1 SV=2 - [MK08_HUMAN]	48.2644	7.96	2	3	4	9	2.69914e+07	4.04811e+07	0.621503	-1.10517	1	0.41674	-1.2439	1	1.38657	-0.0118443	1	0.665303	-1.25058	2
O95163	Elongator complex protein 1 OS=Homo sapiens GN=IKBKAP PE=1 SV=3 - [ELP1_HUMAN]	150.159	0.75	1	1	1	3	3.82827e+06	8.3611e+06	1.96294	0.554019	2	1.14679	0.216484	1				0.662499	-1.25667	1
O43414	ERI1 exoribonuclease 3 OS=Homo sapiens GN=ERI3 PE=1 SV=2 - [ERI3_HUMAN]	37.2137	4.45	1	2	2	4	3.62616e+07	1.33266e+07	1.09345	-0.290112	1	0.979187	-0.0114651	1	0.320504	-2.12495	1	0.638569	-1.30975	1
Q9HD42	Charged multivesicular body protein 1a OS=Homo sapiens GN=CHMP1A PE=1 SV=1 - [CHM1A_HUMAN]	21.6892	8.67	1	2	2	4	2.24093e+07	1.27019e+07	1.68464	0.33344	2	0.719364	-0.456329	2				0.620036	-1.35224	1
P25398	40S ribosomal protein S12 OS=Homo sapiens GN=RPS12 PE=1 SV=3 - [RS12_HUMAN]	14.5055	13.64	1	2	2	9	9.57837e+06	8.83209e+06	2.41724	0.854362	4	0.46642	-1.08142	1	3.47107	1.31201	3	0.561545	-1.49519	1
Q9Y520	Protein PRRC2C OS=Homo sapiens GN=PRRC2C PE=1 SV=4 - [PRC2C_HUMAN]	316.718	1.9	1	5	5	7	3.02772e+07	1.37392e+07	1.29569	-0.0452834	2	0.329339	-1.58348	1	1.39782	-0.000183364	3	0.517045	-1.6143	1
P59190	Ras-related protein Rab-15 OS=Homo sapiens GN=RAB15 PE=1 SV=1 - [RAB15_HUMAN]	24.3752	5.19	1	1	1	3	3.59251e+07	1.93176e+07	1.04339	-0.357721	2	0.114378	-3.10924	1	0.877667	-0.671618	2	0.506507	-1.64401	1
O75131	Copine-3 OS=Homo sapiens GN=CPNE3 PE=1 SV=1 - [CPNE3_HUMAN]	60.0921	1.68	8	1	1	5	0	4.01703e+06				0.674536	-0.549155	2				0.493493	-1.68156	1
P36551	Coproporphyrinogen-III oxidase, mitochondrial OS=Homo sapiens GN=CPOX PE=1 SV=3 - [HEM6_HUMAN]	50.12	2.42	1	1	1	1	0	4.08167e+06				0.584505	-0.755836	1				0.480672	-1.71954	1
P09382	Galectin-1 OS=Homo sapiens GN=LGALS1 PE=1 SV=2 - [LEG1_HUMAN]	14.7062	5.93	1	1	1	5	6.29588e+06	2.38517e+07	0.703244	-0.926902	2	0.354599	-1.47686	2	0.545906	-1.35664	2	0.455162	-1.79821	2
P53992	Protein transport protein Sec24C OS=Homo sapiens GN=SEC24C PE=1 SV=3 - [SC24C_HUMAN]	118.249	0.64	1	1	1	2	1.3435e+07	7.92405e+06	1.2266	-0.124333	1	1.1471	0.216871	1	0.922848	-0.599199	1	0.454037	-1.80178	1
Q14558	Phosphoribosyl pyrophosphate synthase-associated protein 1 OS=Homo sapiens GN=PRPSAP1 PE=1 SV=2 - [KPRA_HUMAN]	39.3686	3.93	2	1	1	2	0	3.06322e+06				0.231754	-2.09046	2				0.31599	-2.32471	2
P63104	14-3-3 protein zeta/delta OS=Homo sapiens GN=YWHAZ PE=1 SV=1 - [1433Z_HUMAN]	27.7277	26.12	1	4	7	37	3.11142e+08	4.16324e+08	0.193578	-2.78802	5	0.203017	-2.28145	2	0.144263	-3.27659	3	0.263716	-2.5856	1
P31946	14-3-3 protein beta/alpha OS=Homo sapiens GN=YWHAB PE=1 SV=3 - [1433B_HUMAN]	28.0648	20.73	2	2	6	39	2.67897e+08	479351050	0.218819	-2.61119	2	0.132908	-2.89263	4	0.181454	-2.94568	2	0.223014	-2.82745	2
P31689	DnaJ homolog subfamily A member 1 OS=Homo sapiens GN=DNAJA1 PE=1 SV=2 - [DNJA1_HUMAN]	44.8395	3.27	1	1	1	4	3.80512e+07	118745515										0.19501	-3.02104	1
P63151	Serine/threonine-protein phosphatase 2A 55 kDa regulatory subunit B alpha isoform OS=Homo sapiens GN=PPP2R2A PE=1 SV=1 - [2ABA_HUMAN]	51.6595	10.74	3	5	5	16	8.8438e+07	8.95241e+07	0.0984539	-3.76341	5	0.0537792	-4.19793	5	0.172754	-3.01657	4	0.110297	-3.84319	4
P62280	40S ribosomal protein S11 OS=Homo sapiens GN=RPS11 PE=1 SV=3 - [RS11_HUMAN]	18.419	6.96	1	1	1	2	0	2.88185e+07				0.0910041	-3.43905	1				0.104168	-3.92568	1
P30153	Serine/threonine-protein phosphatase 2A 65 kDa regulatory subunit A alpha isoform OS=Homo sapiens GN=PPP2R1A PE=1 SV=4 - [2AAA_HUMAN]	65.2669	14.6	1	8	8	25	1.09512e+08	1.1193e+08	0.11315	-3.56269	6	0.0828138	-3.57511	10	0.150348	-3.21699	9	0.10372	-3.9319	10
P27348	14-3-3 protein theta OS=Homo sapiens GN=YWHAQ PE=1 SV=1 - [1433T_HUMAN]	27.7468	33.47	2	5	9	50	3.58029e+08	4.86904e+08	0.0749326	-4.15726	3	0.0611108	-4.01355	4	0.0801808	-4.12396	3	0.0944436	-4.06706	3
P62258	14-3-3 protein epsilon OS=Homo sapiens GN=YWHAE PE=1 SV=1 - [1433E_HUMAN]	29.1554	25.1	1	6	7	38	2.43174e+08	3.65705e+08	0.210864	-2.66462	6	0.121761	-3.019	10	0.0379623	-5.20265	4	0.077069	-4.36037	9
P62714	Serine/threonine-protein phosphatase 2A catalytic subunit beta isoform OS=Homo sapiens GN=PPP2CB PE=1 SV=1 - [PP2AB_HUMAN]	35.5523	6.15	2	2	2	9	8.7881e+07	1.02856e+08	0.130793	-3.35364	4	0.0823999	-3.58234	4	0.0982373	-3.83095	4	0.0747292	-4.40485	3
Q9Y446	Plakophilin-3 OS=Homo sapiens GN=PKP3 PE=1 SV=1 - [PKP3_HUMAN]	87.029	4.39	1	3	3	4	6.67185e+06	6.42784e+06	0.628618	-1.08874	1	0.01	-6.62498	1	1.51238	0.113452	1	0.01	-7.30652	1
P35249	Replication factor C subunit 4 OS=Homo sapiens GN=RFC4 PE=1 SV=2 - [RFC4_HUMAN]	39.6569	5.51	1	2	2	3	1.18194e+07	22613508	0.994829	-0.426479	1	0.01	-6.62498	1	1.45634	0.0589779	1	0.01	-7.30652	1
O75663	TIP41-like protein OS=Homo sapiens GN=TIPRL PE=1 SV=2 - [TIPRL_HUMAN]	31.4237	11.4	1	3	3	6	4.41414e+06	1.53564e+07	0.568825	-1.23294	1	1.8736	0.924688	2	1.0583	-0.401616	1	0.01	-7.30652	1
Q14432	cGMP-inhibited 3',5'-cyclic phosphodiesterase A OS=Homo sapiens GN=PDE3A PE=1 SV=3 - [PDE3A_HUMAN]	124.901	16.83	2	16	16	90	2.31914e+09	3.08929e+09	0.01	-7.06286	19	0.01	-6.62498	15	0.010203	-7.09822	22	0.01	-7.30652	17
P61981	14-3-3 protein gamma OS=Homo sapiens GN=YWHAG PE=1 SV=2 - [1433G_HUMAN]	28.2849	20.65	2	4	6	26	1.90425e+08	4.12065e+08	0.103437	-3.69218	1	0.0109178	-6.49829	2				0.01	-7.30652	1
Q99816	Tumor susceptibility gene 101 protein OS=Homo sapiens GN=TSG101 PE=1 SV=2 - [TS101_HUMAN]	43.9165	2.56	1	1	1	2	5.63076e+06	8.62101e+06				0.01	-6.62498	1				0.01	-7.30652	1
Q5JR59	Microtubule-associated tumor suppressor candidate 2 OS=Homo sapiens GN=MTUS2 PE=1 SV=3 - [MTUS2_HUMAN]	150.103	0.66	1	1	1	1	0	3.45043e+07				0.01	-6.62498	1				0.01	-7.30652	1
Q12906	Interleukin enhancer-binding factor 3 OS=Homo sapiens GN=ILF3 PE=1 SV=3 - [ILF3_HUMAN]	95.2791	3.47	1	3	3	6	5.41981e+06	1.06599e+06	100	6.22486	3				100	6.16049	3
Q8N6T3	ADP-ribosylation factor GTPase-activating protein 1 OS=Homo sapiens GN=ARFGAP1 PE=1 SV=2 - [ARFG1_HUMAN]	44.6403	2.22	1	1	1	6	1.25857e+07	1.17956e+07	7.54301	2.49614	1				11.9124	3.09102	1
P51858	Hepatoma-derived growth factor OS=Homo sapiens GN=HDGF PE=1 SV=1 - [HDGF_HUMAN]	26.7719	4.17	1	1	1	1	1.63513e+07	0	13.0164	3.28326	1				8.78923	2.65237	1
Q8NC51	Plasminogen activator inhibitor 1 RNA-binding protein OS=Homo sapiens GN=SERBP1 PE=1 SV=2 - [PAIRB_HUMAN]	44.9385	3.92	1	1	1	2	739633	0	7.96321	2.57435	2				8.13427	2.54065	2
P30048	Thioredoxin-dependent peroxide reductase, mitochondrial OS=Homo sapiens GN=PRDX3 PE=1 SV=3 - [PRDX3_HUMAN]	27.6752	4.3	1	1	1	7	104432648	113267704	1.52413	0.188986	1				6.22927	2.1557	1
Q8NC96	Adaptin ear-binding coat-associated protein 1 OS=Homo sapiens GN=NECAP1 PE=1 SV=2 - [NECP1_HUMAN]	29.7191	5.09	1	1	1	1	3.29293e+06	0	3.25835	1.28514	1				6.12686	2.13178	1
P05787	Keratin, type II cytoskeletal 8 OS=Homo sapiens GN=KRT8 PE=1 SV=7 - [K2C8_HUMAN]	53.6711	10.97	7	2	8	57	3.39728e+08	4.0135e+09	3.40976	1.35067	2	1.05682	0.0986036	1	5.83485	2.06133	1
P01111	GTPase NRas OS=Homo sapiens GN=NRAS PE=1 SV=1 - [RASN_HUMAN]	21.2155	5.82	3	1	1	5	2.09758e+07	17056075							5.63282	2.01049	1
Q92499	ATP-dependent RNA helicase DDX1 OS=Homo sapiens GN=DDX1 PE=1 SV=2 - [DDX1_HUMAN]	82.3798	0.95	1	1	1	1	1.38047e+07	0	4.04474	1.59705	1				4.53421	1.69749	1
Q9Y5B8	Nucleoside diphosphate kinase 7 OS=Homo sapiens GN=NME7 PE=1 SV=1 - [NDK7_HUMAN]	42.4643	5.05	1	2	2	3	1.1774e+07	0	4.29835	1.68478	1				4.36068	1.64119	1
P00558	Phosphoglycerate kinase 1 OS=Homo sapiens GN=PGK1 PE=1 SV=3 - [PGK1_HUMAN]	44.5861	1.68	1	1	1	1	6.40356e+06	0	4.62373	1.79006	1				4.12054	1.55947	1
Q0IIM8	TBC1 domain family member 8B OS=Homo sapiens GN=TBC1D8B PE=1 SV=2 - [TBC8B_HUMAN]	128.627	0.63	1	1	1	2	5.23769e+06	0	3.78247	1.50033	2				4.05876	1.53767	2
P49840	Glycogen synthase kinase-3 alpha OS=Homo sapiens GN=GSK3A PE=1 SV=2 - [GSK3A_HUMAN]	50.949	6	1	1	3	11	5.202e+07	2.19462e+08	0.933754	-0.517885	1				3.71425	1.40971	1
P62266	40S ribosomal protein S23 OS=Homo sapiens GN=RPS23 PE=1 SV=3 - [RS23_HUMAN]	15.7977	7.69	1	1	1	3	1.96915e+07	0	3.21806	1.26719	2				3.44681	1.3019	2
Q13011	Delta(3,5)-Delta(2,4)-dienoyl-CoA isomerase, mitochondrial OS=Homo sapiens GN=ECH1 PE=1 SV=2 - [ECH1_HUMAN]	35.7934	2.74	1	1	1	3	7.73393e+06	0	2.7461	1.03839	3				3.44127	1.29958	3
P18621	60S ribosomal protein L17 OS=Homo sapiens GN=RPL17 PE=1 SV=3 - [RL17_HUMAN]	21.3833	5.43	1	1	1	1	1.72803e+07	0	6.07395	2.18364	1				3.35358	1.26234	1
P57678	Gem-associated protein 4 OS=Homo sapiens GN=GEMIN4 PE=1 SV=2 - [GEMI4_HUMAN]	119.96	0.85	1	1	1	1	6.55109e+06	0	0.737095	-0.859077	1				3.28694	1.23338	1
P48739	Phosphatidylinositol transfer protein beta isoform OS=Homo sapiens GN=PITPNB PE=1 SV=2 - [PIPNB_HUMAN]	31.5199	4.8	1	1	1	2	9.70405e+06	0	2.43775	0.866549	1				3.22682	1.20675	1
O75439	Mitochondrial-processing peptidase subunit beta OS=Homo sapiens GN=PMPCB PE=1 SV=2 - [MPPB_HUMAN]	54.3315	2.04	1	1	1	1	6130850	0	1.65574	0.308475	1				3.17935	1.18537	1
O14929	Histone acetyltransferase type B catalytic subunit OS=Homo sapiens GN=HAT1 PE=1 SV=1 - [HAT1_HUMAN]	49.4808	4.53	1	2	2	4	2.55169e+07	4.11434e+07	4.24975	1.66838	2				2.93719	1.07107	2
P62750	60S ribosomal protein L23a OS=Homo sapiens GN=RPL23A PE=1 SV=1 - [RL23A_HUMAN]	17.6841	7.05	1	1	1	2	3.26869e+06	0	4.45561	1.73663	2				2.88673	1.04607	2
O76009	Keratin, type I cuticular Ha3-I OS=Homo sapiens GN=KRT33A PE=2 SV=2 - [KT33A_HUMAN]	45.9114	5.2	4	2	2	4	5.35469e+07	0	6.77275	2.34074	1				2.87306	1.03922	1
P0CW22	40S ribosomal protein S17-like OS=Homo sapiens GN=RPS17L PE=1 SV=1 - [RS17L_HUMAN]	15.5404	7.41	1	1	1	2	2.18492e+07	0	2.75759	1.04441	2				2.82985	1.01736	2
O43252	Bifunctional 3'-phosphoadenosine 5'-phosphosulfate synthase 1 OS=Homo sapiens GN=PAPSS1 PE=1 SV=2 - [PAPS1_HUMAN]	70.7876	3.37	1	2	2	3	6.7838e+06	0	1.82709	0.450549	1				2.62373	0.908252	1
P62244	40S ribosomal protein S15a OS=Homo sapiens GN=RPS15A PE=1 SV=2 - [RS15A_HUMAN]	14.83	6.92	1	1	1	2	2.29161e+07	3333444	1.9047	0.510565	1				2.43527	0.800717	1
O43837	Isocitrate dehydrogenase [NAD] subunit beta, mitochondrial OS=Homo sapiens GN=IDH3B PE=1 SV=2 - [IDH3B_HUMAN]	42.1566	4.16	1	1	1	2	1.64675e+07	0	1.60712	0.265479	2				2.43108	0.798235	2
Q9H2W6	39S ribosomal protein L46, mitochondrial OS=Homo sapiens GN=MRPL46 PE=1 SV=1 - [RM46_HUMAN]	31.6854	5.02	1	1	1	2	3.7271e+06	0	1.42681	0.093798	2				2.13591	0.611486	2
Q16658	Fascin OS=Homo sapiens GN=FSCN1 PE=1 SV=3 - [FSCN1_HUMAN]	54.4961	2.43	1	1	1	4	1.78949e+07	2.34891e+07	2.79067	1.06161	3				2.1154	0.597566	3
Q9H6S3	Epidermal growth factor receptor kinase substrate 8-like protein 2 OS=Homo sapiens GN=EPS8L2 PE=1 SV=2 - [ES8L2_HUMAN]	80.5701	3.08	1	2	2	3	6.74759e+06	0	1.67115	0.321838	1				2.10456	0.590155	1
P61081	NEDD8-conjugating enzyme Ubc12 OS=Homo sapiens GN=UBE2M PE=1 SV=1 - [UBC12_HUMAN]	20.8866	3.28	1	1	1	1	4.67255e+06	0	1.49921	0.165202	1				1.89683	0.440224	1
P06730	Eukaryotic translation initiation factor 4E OS=Homo sapiens GN=EIF4E PE=1 SV=2 - [IF4E_HUMAN]	25.0815	6.45	1	1	1	2	47098768	0	1.74754	0.386327	2				1.88062	0.427844	2
P62917	60S ribosomal protein L8 OS=Homo sapiens GN=RPL8 PE=1 SV=2 - [RL8_HUMAN]	28.0073	10.51	1	2	2	2	1.19935e+07	0	2.0919	0.645817	2				1.87238	0.421512	2
P22626	Heterogeneous nuclear ribonucleoproteins A2/B1 OS=Homo sapiens GN=HNRNPA2B1 PE=1 SV=2 - [ROA2_HUMAN]	37.4067	4.25	1	1	1	1	6065380	0	1.67263	0.323119	1				1.84273	0.398479	1
Q9NRN7	L-aminoadipate-semialdehyde dehydrogenase-phosphopantetheinyl transferase OS=Homo sapiens GN=AASDHPPT PE=1 SV=2 - [ADPPT_HUMAN]	35.7531	4.85	1	1	1	1	999370	0	1.48465	0.151125	1				1.79105	0.357442	1
Q15428	Splicing factor 3A subunit 2 OS=Homo sapiens GN=SF3A2 PE=1 SV=2 - [SF3A2_HUMAN]	49.2243	2.16	1	1	1	6	2.59008e+06	1.65773e+06	1.82468	0.448642	1				1.7874	0.354502	1
P21291	Cysteine and glycine-rich protein 1 OS=Homo sapiens GN=CSRP1 PE=1 SV=3 - [CSRP1_HUMAN]	20.5538	8.81	1	1	1	2	1531198	0	1.57403	0.235463	1				1.76321	0.334843	1
P31350	Ribonucleoside-diphosphate reductase subunit M2 OS=Homo sapiens GN=RRM2 PE=1 SV=1 - [RIR2_HUMAN]	44.8488	3.34	1	1	1	5	1.71587e+07	0							1.71919	0.298368	3
O43615	Mitochondrial import inner membrane translocase subunit TIM44 OS=Homo sapiens GN=TIMM44 PE=1 SV=2 - [TIM44_HUMAN]	51.3235	2.43	1	1	1	2	7236020	0	2.04959	0.616334	2				1.69557	0.278409	2
P33316	Deoxyuridine 5'-triphosphate nucleotidohydrolase, mitochondrial OS=Homo sapiens GN=DUT PE=1 SV=4 - [DUT_HUMAN]	26.5466	8.73	1	2	2	4	2.27143e+07	0	1.59492	0.25448	3				1.68419	0.268694	3
Q9NVE7	Pantothenate kinase 4 OS=Homo sapiens GN=PANK4 PE=1 SV=1 - [PANK4_HUMAN]	85.937	3.23	1	2	2	3	2.92251e+06	7944444	1.3663	0.0312722	1				1.67322	0.259266	1
P54619	5'-AMP-activated protein kinase subunit gamma-1 OS=Homo sapiens GN=PRKAG1 PE=1 SV=1 - [AAKG1_HUMAN]	37.5558	8.46	2	3	3	6	1.19272e+07	9.60896e+06	1.32415	-0.0139285	1				1.67187	0.258101	1
P23528	Cofilin-1 OS=Homo sapiens GN=CFL1 PE=1 SV=3 - [COF1_HUMAN]	18.4907	6.63	2	1	1	2	4.79559e+07	0	1.50644	0.172147	1				1.59691	0.191919	1
Q9C035	Tripartite motif-containing protein 5 OS=Homo sapiens GN=TRIM5 PE=1 SV=1 - [TRIM5_HUMAN]	56.3021	1.42	1	1	1	3	1.06869e+07	1.91617e+07	1.00446	-0.412574	1				1.48194	0.0841275	2
P61626	Lysozyme C OS=Homo sapiens GN=LYZ PE=1 SV=1 - [LYSC_HUMAN]	16.5263	8.11	1	1	1	3	1.05801e+07	270026297	0.695078	-0.943753	1				1.47956	0.0818012	1
P68871	Hemoglobin subunit beta OS=Homo sapiens GN=HBB PE=1 SV=2 - [HBB_HUMAN]	15.9883	12.93	5	2	2	7	4.5953e+07	5.33957e+06	1.7603	0.396823	2				1.47496	0.07731	2
P0CW18	Serine protease 56 OS=Homo sapiens GN=PRSS56 PE=1 SV=1 - [PRS56_HUMAN]	64.5564	1.82	1	1	1	1	9.37414e+06	0	6.7981	2.34613	1				1.4545	0.0571637	1
Q9BQ67	Glutamate-rich WD repeat-containing protein 1 OS=Homo sapiens GN=GRWD1 PE=1 SV=1 - [GRWD1_HUMAN]	49.3882	2.02	1	1	1	1	7.01552e+06	0	1.39828	0.0646529	1				1.45162	0.0543036	1
Q9UHD1	Cysteine and histidine-rich domain-containing protein 1 OS=Homo sapiens GN=CHORDC1 PE=1 SV=2 - [CHRD1_HUMAN]	37.4656	2.41	1	1	1	1	1.06235e+07	0	1.019	-0.391838	1				1.44829	0.0509856	1
Q9BSJ2	Gamma-tubulin complex component 2 OS=Homo sapiens GN=TUBGCP2 PE=1 SV=2 - [GCP2_HUMAN]	102.469	0.78	1	1	1	1	3.38961e+06	0	2.6927	1.01006	1				1.44178	0.0444907	1
P49756	RNA-binding protein 25 OS=Homo sapiens GN=RBM25 PE=1 SV=3 - [RBM25_HUMAN]	100.124	1.07	1	1	1	1	7.30685e+06	0	0.81763	-0.70948	1				1.37732	-0.0215034	1
P40926	Malate dehydrogenase, mitochondrial OS=Homo sapiens GN=MDH2 PE=1 SV=3 - [MDHM_HUMAN]	35.4807	2.66	1	1	1	2	2.50234e+07	0	1.23603	-0.113291	1				1.37417	-0.024802	1
Q9UBQ7	Glyoxylate reductase/hydroxypyruvate reductase OS=Homo sapiens GN=GRHPR PE=1 SV=1 - [GRHPR_HUMAN]	35.6457	3.05	1	1	1	4	2.22274e+07	27936712	1.14205	-0.227372	2				1.33346	-0.0681947	2
Q92841	Probable ATP-dependent RNA helicase DDX17 OS=Homo sapiens GN=DDX17 PE=1 SV=2 - [DDX17_HUMAN]	80.222	6.72	1	1	5	19	5.79663e+07	7.02588e+07	1.23193	-0.118082	1				1.31637	-0.0867972	1
Q14764	Major vault protein OS=Homo sapiens GN=MVP PE=1 SV=4 - [MVP_HUMAN]	99.2659	5.38	1	4	4	7	1.50536e+07	0	1.55834	0.221014	5				1.30313	-0.101387	5
Q8NFI3	Cytosolic endo-beta-N-acetylglucosaminidase OS=Homo sapiens GN=ENGASE PE=1 SV=1 - [ENASE_HUMAN]	83.9332	2.83	1	2	2	3	1.26822e+07	0	2.19661	0.71628	3				1.27792	-0.129566	3
P31327	Carbamoyl-phosphate synthase [ammonia], mitochondrial OS=Homo sapiens GN=CPS1 PE=1 SV=2 - [CPSM_HUMAN]	164.835	1.87	2	3	3	4	1.42859e+07	0	0.460721	-1.53703	3				1.26736	-0.14154	2
Q05639	Elongation factor 1-alpha 2 OS=Homo sapiens GN=EEF1A2 PE=1 SV=1 - [EF1A2_HUMAN]	50.4383	21.17	1	1	11	225	6.6598e+09	1.18145e+10	1.33767	0.000723259	1				1.24789	-0.163868	1
Q13356	Peptidyl-prolyl cis-trans isomerase-like 2 OS=Homo sapiens GN=PPIL2 PE=1 SV=1 - [PPIL2_HUMAN]	58.7866	1.92	1	1	1	1	4.4583e+06	0	1.38984	0.0559244	1				1.20491	-0.214439	1
P27816	Microtubule-associated protein 4 OS=Homo sapiens GN=MAP4 PE=1 SV=3 - [MAP4_HUMAN]	120.93	4.51	1	4	4	7	1.74866e+07	0	1.38973	0.055806	6				1.17819	-0.246792	6
Q9H3U1	Protein unc-45 homolog A OS=Homo sapiens GN=UNC45A PE=1 SV=1 - [UN45A_HUMAN]	103.011	3.39	1	3	3	7	1.21309e+07	1.29297e+07	1.49105	0.15733	3	1.16249	0.236102	2	1.13675	-0.298451	3
P38646	Stress-70 protein, mitochondrial OS=Homo sapiens GN=HSPA9 PE=1 SV=2 - [GRP75_HUMAN]	73.6348	3.39	1	2	2	2	1.52684e+07	0	1.28834	-0.0534868	2				1.11594	-0.325105	1
Q99798	Aconitate hydratase, mitochondrial OS=Homo sapiens GN=ACO2 PE=1 SV=2 - [ACON_HUMAN]	85.3719	3.59	1	2	2	6	5.17623e+06	3.21617e+06	1.05766	-0.338121	1				1.1039	-0.340753	1
O95197	Reticulon-3 OS=Homo sapiens GN=RTN3 PE=1 SV=2 - [RTN3_HUMAN]	112.541	0.78	1	1	1	1	5.42038e+06	0	0.69598	-0.941882	1				1.10367	-0.341049	1
P12956	X-ray repair cross-complementing protein 6 OS=Homo sapiens GN=XRCC6 PE=1 SV=2 - [XRCC6_HUMAN]	69.7991	1.31	1	1	1	2	1.13952e+07	0	1.15029	-0.216998	1				1.09983	-0.346084	1
Q96SZ5	2-aminoethanethiol dioxygenase OS=Homo sapiens GN=ADO PE=1 SV=2 - [AEDO_HUMAN]	29.7319	3.33	1	1	1	1	25765815	0	1.31848	-0.0201288	1				1.07981	-0.372586	1
Q8NE71	ATP-binding cassette sub-family F member 1 OS=Homo sapiens GN=ABCF1 PE=1 SV=2 - [ABCF1_HUMAN]	95.8665	2.49	1	2	2	8	3.34182e+07	3.73278e+07	1.34818	0.0120134	3				1.05098	-0.411628	4
P63010	AP-2 complex subunit beta OS=Homo sapiens GN=AP2B1 PE=1 SV=1 - [AP2B1_HUMAN]	104.486	1.07	1	1	1	3	6851840	0	1.17484	-0.18654	1				1.0459	-0.418624	1
P42285	Superkiller viralicidic activity 2-like 2 OS=Homo sapiens GN=SKIV2L2 PE=1 SV=3 - [SK2L2_HUMAN]	117.729	0.77	1	1	1	1	4.47865e+06	0	1.17193	-0.190119	1				1.00925	-0.470079	1
Q13509	Tubulin beta-3 chain OS=Homo sapiens GN=TUBB3 PE=1 SV=2 - [TBB3_HUMAN]	50.4003	22.44	2	1	8	102	2.61202e+08	4.31494e+08	0.655815	-1.02764	1				0.888347	-0.654169	1
P78371	T-complex protein 1 subunit beta OS=Homo sapiens GN=CCT2 PE=1 SV=4 - [TCPB_HUMAN]	57.4521	4.49	1	2	2	2	2.08985e+07	2.03647e+07	0.84003	-0.670487	1				0.871354	-0.682034	1
Q5D862	Filaggrin-2 OS=Homo sapiens GN=FLG2 PE=1 SV=1 - [FILA2_HUMAN]	247.928	2.09	1	1	1	2	1.89131e+06	0	1.4041	0.0706412	2				0.862608	-0.696587	2
Q96C86	m7GpppX diphosphatase OS=Homo sapiens GN=DCPS PE=1 SV=2 - [DCPS_HUMAN]	38.585	2.97	1	1	1	3	4.37632e+06	2.63994e+06	1.59826	0.257499	1				0.84916	-0.719257	1
P10515	Dihydrolipoyllysine-residue acetyltransferase component of pyruvate dehydrogenase complex, mitochondrial OS=Homo sapiens GN=DLAT PE=1 SV=3 - [ODP2_HUMAN]	68.9531	1.24	1	1	1	3	1.39547e+07	0	1.06292	-0.330963	2				0.83074	-0.750896	2
Q9NWT1	p21-activated protein kinase-interacting protein 1 OS=Homo sapiens GN=PAK1IP1 PE=1 SV=2 - [PK1IP_HUMAN]	43.9359	5.1	1	2	2	4	1.62069e+07	0	0.731074	-0.87091	1				0.798376	-0.808223	1
Q14974	Importin subunit beta-1 OS=Homo sapiens GN=KPNB1 PE=1 SV=2 - [IMB1_HUMAN]	97.108	1.03	1	1	1	3	9.38222e+06	6.06867e+06	0.376736	-1.82738	2				0.716498	-0.964329	2
Q14498	RNA-binding protein 39 OS=Homo sapiens GN=RBM39 PE=1 SV=2 - [RBM39_HUMAN]	59.3427	6.98	1	3	3	4	9.29495e+06	0	1.02124	-0.388679	3				0.633658	-1.14159	3
P40939	Trifunctional enzyme subunit alpha, mitochondrial OS=Homo sapiens GN=HADHA PE=1 SV=2 - [ECHA_HUMAN]	82.9469	2.23	1	2	2	3	6.57698e+06	0	1.89595	0.50392	1				0.605594	-1.20694	1
Q7L014	Probable ATP-dependent RNA helicase DDX46 OS=Homo sapiens GN=DDX46 PE=1 SV=2 - [DDX46_HUMAN]	117.29	0.78	1	1	1	1	5.5214e+06	0	0.929097	-0.525098	1				0.601282	-1.21725	1
Q9BUJ2	Heterogeneous nuclear ribonucleoprotein U-like protein 1 OS=Homo sapiens GN=HNRNPUL1 PE=1 SV=2 - [HNRL1_HUMAN]	95.6793	1.52	1	1	1	2	4.23159e+06	0	1.02669	-0.380996	1				0.499929	-1.48357	1
Q9Y285	Phenylalanine--tRNA ligase alpha subunit OS=Homo sapiens GN=FARSA PE=1 SV=3 - [SYFA_HUMAN]	57.5275	1.97	1	1	1	4	8.61882e+06	14500823	0.526235	-1.34522	1				0.374101	-1.90187	1
Q9H2U1	Probable ATP-dependent RNA helicase DHX36 OS=Homo sapiens GN=DHX36 PE=1 SV=2 - [DHX36_HUMAN]	114.688	0.99	1	1	1	1	15703367	0	1.4914	0.157667	1				0.349273	-2.00094	1
P29508	Serpin B3 OS=Homo sapiens GN=SERPINB3 PE=1 SV=2 - [SPB3_HUMAN]	44.5365	4.62	1	1	2	4	2.70213e+07	0	0.2066	-2.69409	1				0.117964	-3.56695	1
P06702	Protein S100-A9 OS=Homo sapiens GN=S100A9 PE=1 SV=1 - [S10A9_HUMAN]	13.2335	17.54	1	2	2	5	56604615	6.99648e+07	0.372561	-1.84345	2				0.116635	-3.58329	2
P48594	Serpin B4 OS=Homo sapiens GN=SERPINB4 PE=1 SV=2 - [SPB4_HUMAN]	44.8255	10.51	1	2	3	5	1.74542e+07	0	0.01	-7.06286	1				0.01	-7.12722	1
Q96PU5	E3 ubiquitin-protein ligase NEDD4-like OS=Homo sapiens GN=NEDD4L PE=1 SV=2 - [NED4L_HUMAN]	111.862	1.03	1	1	1	1	0	9.38472e+06				0.982763	-0.00620651	1
Q9UGK8	Secretion-regulating guanine nucleotide exchange factor OS=Homo sapiens GN=SERGEF PE=1 SV=2 - [SRGEF_HUMAN]	48.9498	3.49	1	1	1	1	0	1.10262e+06				0.248419	-1.99027	1
Q96I24	Far upstream element-binding protein 3 OS=Homo sapiens GN=FUBP3 PE=1 SV=2 - [FUBP3_HUMAN]	61.6022	4.2	1	2	2	4	6.96601e+06	19764004	1.98905	0.573082	1
O43865	Putative adenosylhomocysteinase 2 OS=Homo sapiens GN=AHCYL1 PE=1 SV=2 - [SAHH2_HUMAN]	58.9134	1.89	2	1	1	1	8674948	0	1.40665	0.0732629	1
O14802	DNA-directed RNA polymerase III subunit RPC1 OS=Homo sapiens GN=POLR3A PE=1 SV=2 - [RPC1_HUMAN]	155.542	0.65	2	1	1	1	4.01923e+06	0	1.32207	-0.0161971	1
Q7LG56	Ribonucleoside-diphosphate reductase subunit M2 B OS=Homo sapiens GN=RRM2B PE=1 SV=1 - [RIR2B_HUMAN]	40.7104	2.28	1	1	1	1	7.42038e+06	0	0.7139	-0.905205	1
P04792	Heat shock protein beta-1 OS=Homo sapiens GN=HSPB1 PE=1 SV=2 - [HSPB1_HUMAN]	22.7685	13.17	1	2	2	2	1.85656e+07	0	0.140503	-3.25033	1
P36542	ATP synthase subunit gamma, mitochondrial OS=Homo sapiens GN=ATP5C1 PE=1 SV=1 - [ATPG_HUMAN]	32.9753	7.05	1	2	2	2	6.64869e+06	0
P25705	ATP synthase subunit alpha, mitochondrial OS=Homo sapiens GN=ATP5A1 PE=1 SV=1 - [ATPA_HUMAN]	59.7136	1.45	1	1	1	1	0	5.38325e+06
Q8IZQ1	WD repeat and FYVE domain-containing protein 3 OS=Homo sapiens GN=WDFY3 PE=1 SV=2 - [WDFY3_HUMAN]	395.006	0.6	1	1	1	1	0	1.65855e+07
O95757	Heat shock 70 kDa protein 4L OS=Homo sapiens GN=HSPA4L PE=1 SV=3 - [HS74L_HUMAN]	94.4525	1.67	2	1	1	2	2.64163e+06	4.62615e+06
Q96Q89	Kinesin-like protein KIF20B OS=Homo sapiens GN=KIF20B PE=1 SV=3 - [KI20B_HUMAN]	210.5	0.49	1	1	1	2	0	168988988
O43813	LanC-like protein 1 OS=Homo sapiens GN=LANCL1 PE=1 SV=1 - [LANC1_HUMAN]	45.2536	3.01	1	1	1	1	6.90173e+06	0
O75369	Filamin-B OS=Homo sapiens GN=FLNB PE=1 SV=2 - [FLNB_HUMAN]	277.99	0.85	1	2	2	2	775390	1.66349e+07
P62249	40S ribosomal protein S16 OS=Homo sapiens GN=RPS16 PE=1 SV=2 - [RS16_HUMAN]	16.435	5.48	1	1	1	6	1.24819e+07	5.28953e+06
Q8N1N4	Keratin, type II cytoskeletal 78 OS=Homo sapiens GN=KRT78 PE=2 SV=2 - [K2C78_HUMAN]	56.8305	2.88	3	1	2	2	0	2.26141e+07
P52888	Thimet oligopeptidase OS=Homo sapiens GN=THOP1 PE=1 SV=2 - [THOP1_HUMAN]	78.7895	2.61	1	2	2	3	1.67563e+07	22727176
O95372	Acyl-protein thioesterase 2 OS=Homo sapiens GN=LYPLA2 PE=1 SV=1 - [LYPA2_HUMAN]	24.7207	3.46	1	1	1	1	2.04988e+07	0
Q92526	T-complex protein 1 subunit zeta-2 OS=Homo sapiens GN=CCT6B PE=1 SV=5 - [TCPW_HUMAN]	57.7846	3.96	2	2	2	3	4.32e+06	2.09745e+06
P82650	28S ribosomal protein S22, mitochondrial OS=Homo sapiens GN=MRPS22 PE=1 SV=1 - [RT22_HUMAN]	41.2544	5.28	1	2	2	2	12760849	0
P31947	14-3-3 protein sigma OS=Homo sapiens GN=SFN PE=1 SV=1 - [1433S_HUMAN]	27.7567	8.87	1	1	2	19	2.39657e+08	3.42886e+08
Q6UB35	Monofunctional C1-tetrahydrofolate synthase, mitochondrial OS=Homo sapiens GN=MTHFD1L PE=1 SV=1 - [C1TM_HUMAN]	105.724	1.53	1	2	2	3	7.28602e+06	0
Q15417	Calponin-3 OS=Homo sapiens GN=CNN3 PE=1 SV=1 - [CNN3_HUMAN]	36.3908	4.26	1	1	1	1	0	2.44938e+06
Q9HC38	Glyoxalase domain-containing protein 4 OS=Homo sapiens GN=GLOD4 PE=1 SV=1 - [GLOD4_HUMAN]	34.7713	3.19	1	1	1	3	3884819	1.25178e+07
Q01546	Keratin, type II cytoskeletal 2 oral OS=Homo sapiens GN=KRT76 PE=1 SV=2 - [K22O_HUMAN]	65.8001	7.99	9	1	7	73	6.67162e+08	6.15319e+09
O95678	Keratin, type II cytoskeletal 75 OS=Homo sapiens GN=KRT75 PE=1 SV=2 - [K2C75_HUMAN]	59.524	13.07	7	1	10	85	3.30469e+08	4.84899e+09
Q8IV08	Phospholipase D3 OS=Homo sapiens GN=PLD3 PE=1 SV=1 - [PLD3_HUMAN]	54.6705	2.45	1	1	1	3	0	1.42508e+07
O00148	ATP-dependent RNA helicase DDX39A OS=Homo sapiens GN=DDX39A PE=1 SV=2 - [DX39A_HUMAN]	49.098	1.64	2	1	1	1	0	7.01257e+06
P46776	60S ribosomal protein L27a OS=Homo sapiens GN=RPL27A PE=1 SV=2 - [RL27A_HUMAN]	16.551	7.43	1	1	1	1	0	8.9117e+06
Q9UN37	Vacuolar protein sorting-associated protein 4A OS=Homo sapiens GN=VPS4A PE=1 SV=1 - [VPS4A_HUMAN]	48.867	2.75	3	1	1	1	0	2.5266e+06
P62191	26S protease regulatory subunit 4 OS=Homo sapiens GN=PSMC1 PE=1 SV=1 - [PRS4_HUMAN]	49.1537	2.73	1	1	1	1	0	1.17145e+07
Q9Y570	Protein phosphatase methylesterase 1 OS=Homo sapiens GN=PPME1 PE=1 SV=3 - [PPME1_HUMAN]	42.2882	2.07	1	1	1	1	0	26104298
Q9BRF8	Calcineurin-like phosphoesterase domain-containing protein 1 OS=Homo sapiens GN=CPPED1 PE=1 SV=3 - [CPPED_HUMAN]	35.5259	5.41	1	2	2	3	8.32093e+06	0
Q92616	Translational activator GCN1 OS=Homo sapiens GN=GCN1L1 PE=1 SV=6 - [GCN1L_HUMAN]	292.572	0.37	1	1	1	1	0	8193410
Q2TB90	Putative hexokinase HKDC1 OS=Homo sapiens GN=HKDC1 PE=1 SV=3 - [HKDC1_HUMAN]	102.478	2.29	1	2	2	3	2.00259e+06	1.82281e+06
O00170	AH receptor-interacting protein OS=Homo sapiens GN=AIP PE=1 SV=2 - [AIP_HUMAN]	37.6121	4.55	1	1	1	1	5.7371e+06	0
P48730	Casein kinase I isoform delta OS=Homo sapiens GN=CSNK1D PE=1 SV=2 - [KC1D_HUMAN]	47.3002	3.37	1	1	1	1	4.80698e+06	0
P18887	DNA repair protein XRCC1 OS=Homo sapiens GN=XRCC1 PE=1 SV=2 - [XRCC1_HUMAN]	69.4339	1.9	1	1	1	2	182609524	0
Q9BUP0	EF-hand domain-containing protein D1 OS=Homo sapiens GN=EFHD1 PE=1 SV=1 - [EFHD1_HUMAN]	26.9108	4.6	2	1	1	1	2.83698e+06	0
P29401	Transketolase OS=Homo sapiens GN=TKT PE=1 SV=3 - [TKT_HUMAN]	67.8347	1.44	1	1	1	2	9.7318e+06	0
P07477	Trypsin-1 OS=Homo sapiens GN=PRSS1 PE=1 SV=1 - [TRY1_HUMAN]	26.5411	8.1	3	1	1	1	0	628465
O00443	Phosphatidylinositol 4-phosphate 3-kinase C2 domain-containing subunit alpha OS=Homo sapiens GN=PIK3C2A PE=1 SV=2 - [P3C2A_HUMAN]	190.559	0.65	1	1	1	1	0	2.63128e+06
P30260	Cell division cycle protein 27 homolog OS=Homo sapiens GN=CDC27 PE=1 SV=2 - [CDC27_HUMAN]	91.8093	2.06	1	2	2	2	1.37698e+06	906260
O60443	Non-syndromic hearing impairment protein 5 OS=Homo sapiens GN=DFNA5 PE=1 SV=2 - [DFNA5_HUMAN]	54.5204	2.82	1	1	1	1	0	992504
Q2TBE0	CWF19-like protein 2 OS=Homo sapiens GN=CWF19L2 PE=1 SV=4 - [C19L2_HUMAN]	103.722	0.78	1	1	1	1	6.09682e+06	0
O95486	Protein transport protein Sec24A OS=Homo sapiens GN=SEC24A PE=1 SV=2 - [SC24A_HUMAN]	119.674	0.73	1	1	1	1	6.89782e+06	0
O14744	Protein arginine N-methyltransferase 5 OS=Homo sapiens GN=PRMT5 PE=1 SV=4 - [ANM5_HUMAN]	72.6376	2.67	1	2	2	4	4.64697e+06	5.67612e+06
Q8TB72	Pumilio homolog 2 OS=Homo sapiens GN=PUM2 PE=1 SV=2 - [PUM2_HUMAN]	114.145	1.03	2	1	1	7	16429708	1.42307e+07
P27694	Replication protein A 70 kDa DNA-binding subunit OS=Homo sapiens GN=RPA1 PE=1 SV=2 - [RFA1_HUMAN]	68.0953	2.11	1	1	1	1	0	2.13802e+06
Q8WX93	Palladin OS=Homo sapiens GN=PALLD PE=1 SV=3 - [PALLD_HUMAN]	150.47	0.65	1	1	1	1	4.3327e+06	0
Q9Y266	Nuclear migration protein nudC OS=Homo sapiens GN=NUDC PE=1 SV=1 - [NUDC_HUMAN]	38.2191	3.32	1	1	1	1	0	0
P60660	Myosin light polypeptide 6 OS=Homo sapiens GN=MYL6 PE=1 SV=2 - [MYL6_HUMAN]	16.9191	8.61	1	1	1	1	2.67117e+06	0
P63208	S-phase kinase-associated protein 1 OS=Homo sapiens GN=SKP1 PE=1 SV=2 - [SKP1_HUMAN]	18.6462	7.36	1	1	1	1	0	2.76186e+06
P52209	6-phosphogluconate dehydrogenase, decarboxylating OS=Homo sapiens GN=PGD PE=1 SV=3 - [6PGD_HUMAN]	53.106	1.86	1	1	1	1	0	5.06747e+06
O60566	Mitotic checkpoint serine/threonine-protein kinase BUB1 beta OS=Homo sapiens GN=BUB1B PE=1 SV=3 - [BUB1B_HUMAN]	119.47	0.86	1	1	1	1	6878287	0
Q02252	Methylmalonate-semialdehyde dehydrogenase [acylating], mitochondrial OS=Homo sapiens GN=ALDH6A1 PE=1 SV=2 - [MMSA_HUMAN]	57.8027	1.5	1	1	1	1	7642174	0
Q7Z7B0	Filamin-A-interacting protein 1 OS=Homo sapiens GN=FILIP1 PE=2 SV=1 - [FLIP1_HUMAN]	138.024	0.91	1	1	1	2	1.31037e+09	0
Q13492	Phosphatidylinositol-binding clathrin assembly protein OS=Homo sapiens GN=PICALM PE=1 SV=2 - [PICAL_HUMAN]	70.71	1.23	1	1	1	1	1.85026e+06	0
Q8TF72	Protein Shroom3 OS=Homo sapiens GN=SHROOM3 PE=1 SV=2 - [SHRM3_HUMAN]	216.724	0.45	1	1	1	1	1.93596e+07	0
P08579	U2 small nuclear ribonucleoprotein B'' OS=Homo sapiens GN=SNRPB2 PE=1 SV=1 - [RU2B_HUMAN]	25.4701	3.11	2	1	1	3	12468877	20337742
Q9UQN3	Charged multivesicular body protein 2b OS=Homo sapiens GN=CHMP2B PE=1 SV=1 - [CHM2B_HUMAN]	23.8912	3.29	2	1	1	1	0	3.8165e+06
P27361	Mitogen-activated protein kinase 3 OS=Homo sapiens GN=MAPK3 PE=1 SV=4 - [MK03_HUMAN]	43.1081	5.01	3	1	2	4	4.41766e+06	6.59246e+07
P06744	Glucose-6-phosphate isomerase OS=Homo sapiens GN=GPI PE=1 SV=4 - [G6PI_HUMAN]	63.1072	1.79	1	1	1	1	6.60673e+06	0
P37837	Transaldolase OS=Homo sapiens GN=TALDO1 PE=1 SV=2 - [TALDO_HUMAN]	37.5165	2.37	1	1	1	1	0	7.86803e+06
Q96CW1	AP-2 complex subunit mu OS=Homo sapiens GN=AP2M1 PE=1 SV=2 - [AP2M1_HUMAN]	49.623	1.61	1	1	1	1	1.52748e+06	0
O60684	Importin subunit alpha-7 OS=Homo sapiens GN=KPNA6 PE=1 SV=1 - [IMA7_HUMAN]	59.9915	1.12	2	1	1	2	8.10934e+06	0
Q9UBB9	Tuftelin-interacting protein 11 OS=Homo sapiens GN=TFIP11 PE=1 SV=1 - [TFP11_HUMAN]	96.7584	1.08	1	1	1	3	1.98119e+06	4.07367e+06
P59998	Actin-related protein 2/3 complex subunit 4 OS=Homo sapiens GN=ARPC4 PE=1 SV=3 - [ARPC4_HUMAN]	19.6543	4.76	1	1	1	1	1.44907e+07	0
O14980	Exportin-1 OS=Homo sapiens GN=XPO1 PE=1 SV=1 - [XPO1_HUMAN]	123.306	1.59	1	2	2	5	3.17828e+06	5.02217e+06
P61224	Ras-related protein Rap-1b OS=Homo sapiens GN=RAP1B PE=1 SV=1 - [RAP1B_HUMAN]	20.8116	5.98	2	1	1	1	6.88116e+06	0
Q96B26	Exosome complex component RRP43 OS=Homo sapiens GN=EXOSC8 PE=1 SV=1 - [EXOS8_HUMAN]	30.0203	4.71	1	1	1	1	0	1.5827e+06
O76003	Glutaredoxin-3 OS=Homo sapiens GN=GLRX3 PE=1 SV=2 - [GLRX3_HUMAN]	37.4082	3.28	1	1	1	6	5.7223e+06	8.30595e+06
O94874	E3 UFM1-protein ligase 1 OS=Homo sapiens GN=UFL1 PE=1 SV=2 - [UFL1_HUMAN]	89.5398	1.26	1	1	1	6	2.38807e+07	4.65469e+07
P62277	40S ribosomal protein S13 OS=Homo sapiens GN=RPS13 PE=1 SV=2 - [RS13_HUMAN]	17.2117	11.26	1	2	2	3	3.69421e+06	6.62775e+06
P51148	Ras-related protein Rab-5C OS=Homo sapiens GN=RAB5C PE=1 SV=2 - [RAB5C_HUMAN]	23.4678	5.56	1	1	1	1	1.0706e+06	0
P46783	40S ribosomal protein S10 OS=Homo sapiens GN=RPS10 PE=1 SV=1 - [RS10_HUMAN]	18.8859	5.45	2	1	1	2	3.88958e+06	0
P85037	Forkhead box protein K1 OS=Homo sapiens GN=FOXK1 PE=1 SV=1 - [FOXK1_HUMAN]	75.4106	1.23	1	1	1	1	0	8.10046e+06
P67809	Nuclease-sensitive element-binding protein 1 OS=Homo sapiens GN=YBX1 PE=1 SV=3 - [YBOX1_HUMAN]	35.9027	5.86	1	1	1	3	2.34433e+06	0
Q9BY32	Inosine triphosphate pyrophosphatase OS=Homo sapiens GN=ITPA PE=1 SV=2 - [ITPA_HUMAN]	21.4319	4.64	1	1	1	1	0	18865710
P61088	Ubiquitin-conjugating enzyme E2 N OS=Homo sapiens GN=UBE2N PE=1 SV=1 - [UBE2N_HUMAN]	17.127	6.58	2	1	1	1	0	2.09756e+07
P48728	Aminomethyltransferase, mitochondrial OS=Homo sapiens GN=AMT PE=1 SV=1 - [GCST_HUMAN]	43.9176	1.99	1	1	1	1	4.69696e+06	0
Q15349	Ribosomal protein S6 kinase alpha-2 OS=Homo sapiens GN=RPS6KA2 PE=1 SV=2 - [KS6A2_HUMAN]	83.1861	1.09	3	1	1	3	1.54263e+07	1.90136e+07
A8MT79	Putative zinc-alpha-2-glycoprotein-like 1 OS=Homo sapiens PE=5 SV=2 - [ZAGL1_HUMAN]	22.9655	4.9	2	1	1	1	2.17134e+06	0
Q9NSB4	Keratin, type II cuticular Hb2 OS=Homo sapiens GN=KRT82 PE=1 SV=3 - [KRT82_HUMAN]	56.6163	1.75	1	1	1	3	138767304	0
O43790	Keratin, type II cuticular Hb6 OS=Homo sapiens GN=KRT86 PE=1 SV=1 - [KRT86_HUMAN]	53.4663	9.05	7	5	6	8	1.06338e+08	2.17956e+07
A6NCW0	Ubiquitin carboxyl-terminal hydrolase 17-like protein 3 OS=Homo sapiens GN=USP17L3 PE=3 SV=1 - [U17L3_HUMAN]	59.4975	1.32	15	1	1	1	0	2.59909e+07
P01857	Ig gamma-1 chain C region OS=Homo sapiens GN=IGHG1 PE=1 SV=1 - [IGHG1_HUMAN]	36.0832	3.64	1	1	1	2	2.03581e+07	0
Q5VSP4	Putative lipocalin 1-like protein 1 OS=Homo sapiens GN=LCN1P1 PE=5 SV=1 - [LC1L1_HUMAN]	17.907	6.79	2	1	1	1	8.69255e+06	0
P47929	Galectin-7 OS=Homo sapiens GN=LGALS7 PE=1 SV=2 - [LEG7_HUMAN]	15.0658	8.09	1	1	1	1	4.07328e+07	0
P01877	Ig alpha-2 chain C region OS=Homo sapiens GN=IGHA2 PE=1 SV=3 - [IGHA2_HUMAN]	36.503	2.94	2	1	1	2	0	59320670
Q5TFE4	5'-nucleotidase domain-containing protein 1 OS=Homo sapiens GN=NT5DC1 PE=1 SV=1 - [NT5D1_HUMAN]	51.8119	1.54	1	1	1	3	9.0541e+07	6.95369e+07
Q9NZT1	Calmodulin-like protein 5 OS=Homo sapiens GN=CALML5 PE=1 SV=2 - [CALL5_HUMAN]	15.8828	5.48	1	1	1	1	3.63407e+06	0
Q9UK41	Vacuolar protein sorting-associated protein 28 homolog OS=Homo sapiens GN=VPS28 PE=1 SV=1 - [VPS28_HUMAN]	25.4086	2.71	1	1	1	6	16371903	2.85329e+07
Q9NQE9	Histidine triad nucleotide-binding protein 3 OS=Homo sapiens GN=HINT3 PE=1 SV=1 - [HINT3_HUMAN]	20.3481	5.49	1	1	1	1	0	3.34085e+06
Q01433	AMP deaminase 2 OS=Homo sapiens GN=AMPD2 PE=1 SV=2 - [AMPD2_HUMAN]	100.624	2.5	1	2	2	2	4.244e+06	4.22229e+06
P57060	RWD domain-containing protein 2B OS=Homo sapiens GN=RWDD2B PE=1 SV=1 - [RWD2B_HUMAN]	36.3089	2.19	1	1	1	3	0	0
P20073	Annexin A7 OS=Homo sapiens GN=ANXA7 PE=1 SV=3 - [ANXA7_HUMAN]	52.7058	1.84	1	1	1	3	1.02894e+07	1.20025e+07
Q08J23	tRNA (cytosine(34)-C(5))-methyltransferase OS=Homo sapiens GN=NSUN2 PE=1 SV=2 - [NSUN2_HUMAN]	86.4158	1.17	1	1	1	3	1785742	6.44621e+06
Q93099	Homogentisate 1,2-dioxygenase OS=Homo sapiens GN=HGD PE=1 SV=2 - [HGD_HUMAN]	49.9316	2.47	1	1	1	1	0	1.71089e+07
Q9H0S4	Probable ATP-dependent RNA helicase DDX47 OS=Homo sapiens GN=DDX47 PE=1 SV=1 - [DDX47_HUMAN]	50.6147	2.42	1	1	1	1	0	891911
P33151	Cadherin-5 OS=Homo sapiens GN=CDH5 PE=1 SV=5 - [CADH5_HUMAN]	87.474	1.53	1	1	1	1	0	66436632
Q96GD4	Aurora kinase B OS=Homo sapiens GN=AURKB PE=1 SV=3 - [AURKB_HUMAN]	39.2856	3.49	1	1	1	5	3.19107e+06	7.65757e+06
P48052	Carboxypeptidase A2 OS=Homo sapiens GN=CPA2 PE=1 SV=3 - [CBPA2_HUMAN]	47.0006	1.67	2	1	1	1	0	7.53787e+07
Q8NBN7	Retinol dehydrogenase 13 OS=Homo sapiens GN=RDH13 PE=1 SV=2 - [RDH13_HUMAN]	35.9099	3.93	1	1	1	4	3.82937e+06	2834309
O14682	Ectoderm-neural cortex protein 1 OS=Homo sapiens GN=ENC1 PE=1 SV=2 - [ENC1_HUMAN]	66.0871	1.7	1	1	1	1	1.12771e+07	0
Q8IZY5	BH3-like motif-containing cell death inducer OS=Homo sapiens GN=BLID PE=1 SV=2 - [BLID_HUMAN]	12.0373	8.33	1	1	1	1	982145	0
O43760	Synaptogyrin-2 OS=Homo sapiens GN=SYNGR2 PE=1 SV=1 - [SNG2_HUMAN]	24.7941	4.46	1	1	1	1	850524	0
Q9BRX9	WD repeat domain-containing protein 83 OS=Homo sapiens GN=WDR83 PE=1 SV=1 - [WDR83_HUMAN]	34.3208	4.44	1	1	1	1	3964864	0
Q5HYN5	Cancer/testis antigen family 45 member A1 OS=Homo sapiens GN=CT45A1 PE=2 SV=1 - [CT451_HUMAN]	21.259	3.7	2	1	1	2	1.28663e+07	0
P51788	Chloride channel protein 2 OS=Homo sapiens GN=CLCN2 PE=1 SV=2 - [CLCN2_HUMAN]	98.4723	1.22	1	1	1	1	0	2.37931e+07
Q06330	Recombining binding protein suppressor of hairless OS=Homo sapiens GN=RBPJ PE=1 SV=3 - [SUH_HUMAN]	55.6015	2.2	1	1	1	1	687370	0
Q6H8Q1	Actin-binding LIM protein 2 OS=Homo sapiens GN=ABLIM2 PE=1 SV=2 - [ABLM2_HUMAN]	67.7688	1.47	1	1	1	2	1.63119e+06	5.53399e+06
Q15427	Splicing factor 3B subunit 4 OS=Homo sapiens GN=SF3B4 PE=1 SV=1 - [SF3B4_HUMAN]	44.3571	1.42	1	1	1	1	0	9.67953e+06
Q99959	Plakophilin-2 OS=Homo sapiens GN=PKP2 PE=1 SV=2 - [PKP2_HUMAN]	97.3548	1.14	1	1	1	1	0	950183
Q6NXE6	Armadillo repeat-containing protein 6 OS=Homo sapiens GN=ARMC6 PE=1 SV=2 - [ARMC6_HUMAN]	54.1074	2	1	1	1	1	0	4.4248e+06
Q15019	Septin-2 OS=Homo sapiens GN=SEPT2 PE=1 SV=1 - [SEPT2_HUMAN]	41.4613	2.49	1	1	1	1	0	7.11525e+06
Q01469	Fatty acid-binding protein, epidermal OS=Homo sapiens GN=FABP5 PE=1 SV=3 - [FABP5_HUMAN]	15.1546	5.19	1	1	1	3	0	1.16254e+08
P05090	Apolipoprotein D OS=Homo sapiens GN=APOD PE=1 SV=1 - [APOD_HUMAN]	21.2618	5.82	1	1	1	2	0	3.27802e+07
Q13228	Selenium-binding protein 1 OS=Homo sapiens GN=SELENBP1 PE=1 SV=2 - [SBP1_HUMAN]	52.3576	1.91	1	1	1	2	0	7.52155e+06
P02788	Lactotransferrin OS=Homo sapiens GN=LTF PE=1 SV=6 - [TRFL_HUMAN]	78.1319	1.41	1	1	1	2	0	15157756
P47712	Cytosolic phospholipase A2 OS=Homo sapiens GN=PLA2G4A PE=1 SV=2 - [PA24A_HUMAN]	85.1842	0.93	1	1	1	1	0	18793822
P29034	Protein S100-A2 OS=Homo sapiens GN=S100A2 PE=1 SV=3 - [S10A2_HUMAN]	11.1094	9.18	1	1	1	1	0	22962895

## Sheet: Supplemental Table 2B
Accession	Description	MW [kDa]	ΣCoverage	Σ# Proteins	Σ# Unique Peptides	Σ# Peptides	Σ# PSMs	# Peptides PDE3A IP +cilostamide	# PSM PDE3A IP +cilostamide	# Peptides PDE3A IP -cilostamide	# PSM PDE3A IP -cilostamide	# Peptides C3	# PSM C3
P35908	Keratin, type II cytoskeletal 2 epidermal OS=Homo sapiens GN=KRT2 PE=1 SV=2 - [K22E_HUMAN]	65.3932	57.75	4	30	41	510	40	251	24	79	27	180
P04264	Keratin, type II cytoskeletal 1 OS=Homo sapiens GN=KRT1 PE=1 SV=6 - [K2C1_HUMAN]	65.999	53.57	1	38	45	798	42	351	27	123	26	324
Q04695	Keratin, type I cytoskeletal 17 OS=Homo sapiens GN=KRT17 PE=1 SV=2 - [K1C17_HUMAN]	48.076	52.55	4	15	28	228	19	85	10	22	26	121
P05787	Keratin, type II cytoskeletal 8 OS=Homo sapiens GN=KRT8 PE=1 SV=7 - [K2C8_HUMAN]	53.6711	50.52	4	23	33	117	17	33	12	15	29	69
P13647	Keratin, type II cytoskeletal 5 OS=Homo sapiens GN=KRT5 PE=1 SV=3 - [K2C5_HUMAN]	62.34	44.07	3	21	35	229	31	123	14	26	20	80
P35527	Keratin, type I cytoskeletal 9 OS=Homo sapiens GN=KRT9 PE=1 SV=3 - [K1C9_HUMAN]	62.0268	42.54	1	22	23	427	18	177	16	89	14	161
P08670	Vimentin OS=Homo sapiens GN=VIM PE=1 SV=4 - [VIME_HUMAN]	53.6191	42.49	3	17	18	44	9	11	12	14	10	19
P02533	Keratin, type I cytoskeletal 14 OS=Homo sapiens GN=KRT14 PE=1 SV=4 - [K1C14_HUMAN]	51.5294	41.95	5	3	21	312	17	126	8	42	18	144
P13645	Keratin, type I cytoskeletal 10 OS=Homo sapiens GN=KRT10 PE=1 SV=6 - [K1C10_HUMAN]	58.7917	39.38	6	23	30	733	29	318	21	114	23	301
P04259	Keratin, type II cytoskeletal 6B OS=Homo sapiens GN=KRT6B PE=1 SV=5 - [K2C6B_HUMAN]	60.0303	39.01	3	3	27	188	25	94	8	25	12	69
P02538	Keratin, type II cytoskeletal 6A OS=Homo sapiens GN=KRT6A PE=1 SV=3 - [K2C6A_HUMAN]	60.0083	38.12	3	3	26	149	25	78	7	16	13	55
P0CG48	Polyubiquitin-C OS=Homo sapiens GN=UBC PE=1 SV=3 - [UBC_HUMAN]	76.9915	36.79	4	3	3	6	3	6
P08727	Keratin, type I cytoskeletal 19 OS=Homo sapiens GN=KRT19 PE=1 SV=4 - [K1C19_HUMAN]	44.0791	35.75	4	8	15	156	8	56	7	15	15	85
P60709	Actin, cytoplasmic 1 OS=Homo sapiens GN=ACTB PE=1 SV=1 - [ACTB_HUMAN]	41.7097	33.87	12	12	12	116	12	45	9	22	11	49
P07437	Tubulin beta chain OS=Homo sapiens GN=TUBB PE=1 SV=2 - [TBB5_HUMAN]	49.639	33.78	7	3	15	76	11	35	13	26	8	15
P08779	Keratin, type I cytoskeletal 16 OS=Homo sapiens GN=KRT16 PE=1 SV=4 - [K1C16_HUMAN]	51.2362	30.87	5	4	16	277	14	113	9	36	16	128
P34896	Serine hydroxymethyltransferase, cytosolic OS=Homo sapiens GN=SHMT1 PE=1 SV=1 - [GLYC_HUMAN]	53.049	30.23	1	11	12	18	1	2			12	16
P68371	Tubulin beta-4B chain OS=Homo sapiens GN=TUBB4B PE=1 SV=1 - [TBB4B_HUMAN]	49.799	29.44	6	3	14	66	11	33	11	21	7	12
Q9BQE3	Tubulin alpha-1C chain OS=Homo sapiens GN=TUBA1C PE=1 SV=1 - [TBA1C_HUMAN]	49.8635	28.95	6	1	9	31	4	9	8	13	6	9
P68363	Tubulin alpha-1B chain OS=Homo sapiens GN=TUBA1B PE=1 SV=1 - [TBA1B_HUMAN]	50.1196	28.82	3	1	9	32	4	9	8	13	7	10
Q06830	Peroxiredoxin-1 OS=Homo sapiens GN=PRDX1 PE=1 SV=1 - [PRDX1_HUMAN]	22.0963	28.64	2	5	6	20	6	13	1	1	4	6
P63104	14-3-3 protein zeta/delta OS=Homo sapiens GN=YWHAZ PE=1 SV=1 - [1433Z_HUMAN]	27.7277	28.16	1	4	6	10	6	7	2	2	1	1
P07195	L-lactate dehydrogenase B chain OS=Homo sapiens GN=LDHB PE=1 SV=2 - [LDHB_HUMAN]	36.6151	28.14	2	7	9	43	7	20	8	14	5	9
P04406	Glyceraldehyde-3-phosphate dehydrogenase OS=Homo sapiens GN=GAPDH PE=1 SV=3 - [G3P_HUMAN]	36.0304	26.87	2	7	7	33	7	24	4	5	3	4
P60174	Triosephosphate isomerase OS=Homo sapiens GN=TPI1 PE=1 SV=3 - [TPIS_HUMAN]	30.7717	26.57	1	8	8	36	8	22	5	8	4	6
P60660	Myosin light polypeptide 6 OS=Homo sapiens GN=MYL6 PE=1 SV=2 - [MYL6_HUMAN]	16.9191	25.83	2	3	3	9	2	3			3	6
P25705	ATP synthase subunit alpha, mitochondrial OS=Homo sapiens GN=ATP5A1 PE=1 SV=1 - [ATPA_HUMAN]	59.7136	25.32	1	13	13	26	8	13	9	10	3	3
P00338	L-lactate dehydrogenase A chain OS=Homo sapiens GN=LDHA PE=1 SV=2 - [LDHA_HUMAN]	36.6654	25.3	3	7	9	53	7	28	8	16	5	9
P11142	Heat shock cognate 71 kDa protein OS=Homo sapiens GN=HSPA8 PE=1 SV=1 - [HSP7C_HUMAN]	70.8542	24.61	2	12	14	68	14	47	5	10	5	11
O00330	Pyruvate dehydrogenase protein X component, mitochondrial OS=Homo sapiens GN=PDHX PE=1 SV=3 - [ODPX_HUMAN]	54.0888	23.35	1	11	11	23	7	9	10	13	1	1
P04075	Fructose-bisphosphate aldolase A OS=Homo sapiens GN=ALDOA PE=1 SV=2 - [ALDOA_HUMAN]	39.3953	23.08	2	9	10	34	10	25	4	6	2	3
P06733	Alpha-enolase OS=Homo sapiens GN=ENO1 PE=1 SV=2 - [ENOA_HUMAN]	47.1393	22.58	1	11	11	30	11	22	4	5	3	3
P50990	T-complex protein 1 subunit theta OS=Homo sapiens GN=CCT8 PE=1 SV=4 - [TCPQ_HUMAN]	59.5825	22.45	1	12	12	18	12	17	1	1
P10809	60 kDa heat shock protein, mitochondrial OS=Homo sapiens GN=HSPD1 PE=1 SV=2 - [CH60_HUMAN]	61.0164	22.34	1	13	13	40	13	30	4	6	3	4
Q13347	Eukaryotic translation initiation factor 3 subunit I OS=Homo sapiens GN=EIF3I PE=1 SV=1 - [EIF3I_HUMAN]	36.4786	22.15	1	8	8	19	7	9	7	10
P62826	GTP-binding nuclear protein Ran OS=Homo sapiens GN=RAN PE=1 SV=3 - [RAN_HUMAN]	24.4076	21.76	1	5	5	10	5	7	1	1	2	2
O00303	Eukaryotic translation initiation factor 3 subunit F OS=Homo sapiens GN=EIF3F PE=1 SV=1 - [EIF3F_HUMAN]	37.5402	21.57	1	7	7	17	3	4	6	13
P23396	40S ribosomal protein S3 OS=Homo sapiens GN=RPS3 PE=1 SV=2 - [RS3_HUMAN]	26.6714	21.4	1	5	5	9	5	8	1	1
P06576	ATP synthase subunit beta, mitochondrial OS=Homo sapiens GN=ATP5B PE=1 SV=3 - [ATPB_HUMAN]	56.5246	20.98	1	9	9	28	6	13	9	12	2	3
Q7Z794	Keratin, type II cytoskeletal 1b OS=Homo sapiens GN=KRT77 PE=2 SV=3 - [K2C1B_HUMAN]	61.8635	20.76	2	10	15	85	15	49	3	8	4	28
O60361	Putative nucleoside diphosphate kinase OS=Homo sapiens GN=NME2P1 PE=5 SV=1 - [NDK8_HUMAN]	15.519	20.44	3	3	3	4	3	4
P81605	Dermcidin OS=Homo sapiens GN=DCD PE=1 SV=2 - [DCD_HUMAN]	11.2768	20	1	2	2	9	2	6			1	3
Q7Z7K6	Centromere protein V OS=Homo sapiens GN=CENPV PE=1 SV=1 - [CENPV_HUMAN]	29.9271	20	1	4	4	9	2	3	4	6
P08238	Heat shock protein HSP 90-beta OS=Homo sapiens GN=HSP90AB1 PE=1 SV=4 - [HS90B_HUMAN]	83.2121	19.75	6	9	15	56	15	48	2	2	5	6
P14618	Pyruvate kinase PKM OS=Homo sapiens GN=PKM PE=1 SV=4 - [KPYM_HUMAN]	57.9	19.21	2	10	10	28	10	22	2	4	1	2
Q9Y5P6	Mannose-1-phosphate guanyltransferase beta OS=Homo sapiens GN=GMPPB PE=1 SV=2 - [GMPPB_HUMAN]	39.8086	19.17	1	7	7	18	7	11	5	7
P05783	Keratin, type I cytoskeletal 18 OS=Homo sapiens GN=KRT18 PE=1 SV=2 - [K1C18_HUMAN]	48.0285	18.84	2	6	8	65	2	16	2	3	8	46
Q9Y262	Eukaryotic translation initiation factor 3 subunit L OS=Homo sapiens GN=EIF3L PE=1 SV=1 - [EIF3L_HUMAN]	66.6844	18.79	1	11	11	19	11	19
P14923	Junction plakoglobin OS=Homo sapiens GN=JUP PE=1 SV=3 - [PLAK_HUMAN]	81.6927	18.66	2	14	14	29	14	26	1	1	1	2
P63244	Guanine nucleotide-binding protein subunit beta-2-like 1 OS=Homo sapiens GN=GNB2L1 PE=1 SV=3 - [GBLP_HUMAN]	35.0546	18.61	1	6	6	8	6	7	1	1
O43790	Keratin, type II cuticular Hb6 OS=Homo sapiens GN=KRT86 PE=1 SV=1 - [KRT86_HUMAN]	53.4663	18.31	5	4	8	10	2	2			8	8
P01771	Ig heavy chain V-III region HIL OS=Homo sapiens PE=1 SV=1 - [HV310_HUMAN]	13.5572	18.18	1	1	1	1					1	1
P07900	Heat shock protein HSP 90-alpha OS=Homo sapiens GN=HSP90AA1 PE=1 SV=5 - [HS90A_HUMAN]	84.6067	18.17	5	8	14	42	14	38	1	1	2	3
P31949	Protein S100-A11 OS=Homo sapiens GN=S100A11 PE=1 SV=2 - [S10AB_HUMAN]	11.7328	18.1	1	2	2	4	2	4
P04792	Heat shock protein beta-1 OS=Homo sapiens GN=HSPB1 PE=1 SV=2 - [HSPB1_HUMAN]	22.7685	18.05	1	4	4	4	4	4
P30041	Peroxiredoxin-6 OS=Homo sapiens GN=PRDX6 PE=1 SV=3 - [PRDX6_HUMAN]	25.0192	17.41	1	4	4	6	4	5			1	1
P68104	Elongation factor 1-alpha 1 OS=Homo sapiens GN=EEF1A1 PE=1 SV=1 - [EF1A1_HUMAN]	50.1091	17.1	3	8	8	40	5	18	6	12	3	10
P38646	Stress-70 protein, mitochondrial OS=Homo sapiens GN=HSPA9 PE=1 SV=2 - [GRP75_HUMAN]	73.6348	16.94	1	10	10	46	9	25	6	7	9	14
P13646	Keratin, type I cytoskeletal 13 OS=Homo sapiens GN=KRT13 PE=1 SV=4 - [K1C13_HUMAN]	49.5574	16.81	6	2	10	88	9	36	2	4	7	48
P07355	Annexin A2 OS=Homo sapiens GN=ANXA2 PE=1 SV=2 - [ANXA2_HUMAN]	38.5798	16.81	2	6	6	27	6	19	3	4	3	4
P02768	Serum albumin OS=Homo sapiens GN=ALB PE=1 SV=2 - [ALBU_HUMAN]	69.3215	16.75	1	12	12	80	10	33	8	22	10	25
P60228	Eukaryotic translation initiation factor 3 subunit E OS=Homo sapiens GN=EIF3E PE=1 SV=1 - [EIF3E_HUMAN]	52.1874	16.4	1	7	7	14	3	6	6	8
P08107	Heat shock 70 kDa protein 1A/1B OS=Homo sapiens GN=HSPA1A PE=1 SV=5 - [HSP71_HUMAN]	70.009	16.22	4	8	10	41	10	26	3	6	3	9
P61981	14-3-3 protein gamma OS=Homo sapiens GN=YWHAG PE=1 SV=2 - [1433G_HUMAN]	28.2849	16.19	2	2	4	12	3	6	3	4	1	2
P27348	14-3-3 protein theta OS=Homo sapiens GN=YWHAQ PE=1 SV=1 - [1433T_HUMAN]	27.7468	15.92	3	1	4	13	4	7	3	4	1	2
P62263	40S ribosomal protein S14 OS=Homo sapiens GN=RPS14 PE=1 SV=3 - [RS14_HUMAN]	16.2625	15.89	1	2	2	5	2	3	1	1	1	1
Q04837	Single-stranded DNA-binding protein, mitochondrial OS=Homo sapiens GN=SSBP1 PE=1 SV=1 - [SSBP_HUMAN]	17.249	15.54	1	2	2	4	2	3			1	1
P15924	Desmoplakin OS=Homo sapiens GN=DSP PE=1 SV=3 - [DESP_HUMAN]	331.569	15.53	1	47	47	72	44	60	1	1	10	11
Q8IYB1	Protein MB21D2 OS=Homo sapiens GN=MB21D2 PE=1 SV=3 - [M21D2_HUMAN]	55.7643	15.48	1	7	7	8	1	1	7	7
P47929	Galectin-7 OS=Homo sapiens GN=LGALS7 PE=1 SV=2 - [LEG7_HUMAN]	15.0658	15.44	1	2	2	14	2	3			1	11
P00558	Phosphoglycerate kinase 1 OS=Homo sapiens GN=PGK1 PE=1 SV=3 - [PGK1_HUMAN]	44.5861	15.35	2	6	6	15	4	5	5	6	2	4
Q8N1N4	Keratin, type II cytoskeletal 78 OS=Homo sapiens GN=KRT78 PE=2 SV=2 - [K2C78_HUMAN]	56.8305	15.19	1	8	9	29	9	24	1	2	1	3
P11021	78 kDa glucose-regulated protein OS=Homo sapiens GN=HSPA5 PE=1 SV=2 - [GRP78_HUMAN]	72.2884	15.14	1	8	9	19	9	17	1	1	1	1
P01611	Ig kappa chain V-I region Wes OS=Homo sapiens PE=1 SV=1 - [KV119_HUMAN]	11.6007	14.81	1	1	1	3					1	3
P01594	Ig kappa chain V-I region AU OS=Homo sapiens PE=1 SV=1 - [KV102_HUMAN]	11.9318	14.81	1	1	1	2					1	2
P01593	Ig kappa chain V-I region AG OS=Homo sapiens PE=1 SV=1 - [KV101_HUMAN]	11.9849	14.81	1	1	1	2					1	2
P15880	40S ribosomal protein S2 OS=Homo sapiens GN=RPS2 PE=1 SV=2 - [RS2_HUMAN]	31.3046	14.68	1	5	5	8	4	5	3	3
P30050	60S ribosomal protein L12 OS=Homo sapiens GN=RPL12 PE=1 SV=1 - [RL12_HUMAN]	17.8075	14.55	1	2	2	9	2	6	1	2	1	1
P31944	Caspase-14 OS=Homo sapiens GN=CASP14 PE=1 SV=2 - [CASPE_HUMAN]	27.662	14.46	1	4	4	9	4	7	1	1	1	1
O60814	Histone H2B type 1-K OS=Homo sapiens GN=HIST1H2BK PE=1 SV=3 - [H2B1K_HUMAN]	13.8816	14.29	15	2	2	5	1	1	1	1	2	3
P31947	14-3-3 protein sigma OS=Homo sapiens GN=SFN PE=1 SV=1 - [1433S_HUMAN]	27.7567	14.11	1	2	3	4	2	2	1	1	1	1
Q14432	cGMP-inhibited 3',5'-cyclic phosphodiesterase A OS=Homo sapiens GN=PDE3A PE=1 SV=3 - [PDE3A_HUMAN]	124.901	14.11	2	14	14	61	13	37	9	24
Q96IJ6	Mannose-1-phosphate guanyltransferase alpha OS=Homo sapiens GN=GMPPA PE=1 SV=1 - [GMPPA_HUMAN]	46.2621	14.05	1	5	5	26	5	14	5	12
P61978	Heterogeneous nuclear ribonucleoprotein K OS=Homo sapiens GN=HNRNPK PE=1 SV=1 - [HNRPK_HUMAN]	50.9444	13.82	1	6	6	6	6	6
P01602	Ig kappa chain V-I region HK102 (Fragment) OS=Homo sapiens GN=IGKV1-5 PE=4 SV=1 - [KV110_HUMAN]	12.7603	13.68	1	1	1	2					1	2
P31327	Carbamoyl-phosphate synthase [ammonia], mitochondrial OS=Homo sapiens GN=CPS1 PE=1 SV=2 - [CPSM_HUMAN]	164.835	13.67	1	18	18	26	17	23	3	3
Q14525	Keratin, type I cuticular Ha3-II OS=Homo sapiens GN=KRT33B PE=2 SV=3 - [KT33B_HUMAN]	46.1845	13.37	8	4	6	53	2	15	1	2	6	36
P62937	Peptidyl-prolyl cis-trans isomerase A OS=Homo sapiens GN=PPIA PE=1 SV=2 - [PPIA_HUMAN]	18.0009	13.33	1	2	2	4	2	2	1	1	1	1
P30101	Protein disulfide-isomerase A3 OS=Homo sapiens GN=PDIA3 PE=1 SV=4 - [PDIA3_HUMAN]	56.7468	13.27	1	6	6	14	6	13			1	1
O75821	Eukaryotic translation initiation factor 3 subunit G OS=Homo sapiens GN=EIF3G PE=1 SV=2 - [EIF3G_HUMAN]	35.5889	13.13	1	4	4	7	3	4	2	3
O15372	Eukaryotic translation initiation factor 3 subunit H OS=Homo sapiens GN=EIF3H PE=1 SV=1 - [EIF3H_HUMAN]	39.9051	13.07	1	4	4	8	4	5	2	3
P61626	Lysozyme C OS=Homo sapiens GN=LYZ PE=1 SV=1 - [LYSC_HUMAN]	16.5263	12.84	1	2	2	5	1	3			2	2
Q6KB66	Keratin, type II cytoskeletal 80 OS=Homo sapiens GN=KRT80 PE=1 SV=2 - [K2C80_HUMAN]	50.4938	12.83	2	5	6	13	6	10	1	1	2	2
Q07020	60S ribosomal protein L18 OS=Homo sapiens GN=RPL18 PE=1 SV=2 - [RL18_HUMAN]	21.6211	12.77	1	2	2	2	2	2
P47756	F-actin-capping protein subunit beta OS=Homo sapiens GN=CAPZB PE=1 SV=4 - [CAPZB_HUMAN]	31.3308	12.27	1	3	3	6	2	2	2	3	1	1
P13639	Elongation factor 2 OS=Homo sapiens GN=EEF2 PE=1 SV=4 - [EF2_HUMAN]	95.277	12.24	2	10	10	19	10	15	2	3	1	1
P01040	Cystatin-A OS=Homo sapiens GN=CSTA PE=1 SV=1 - [CYTA_HUMAN]	10.9997	12.24	1	1	1	3	1	3
P26038	Moesin OS=Homo sapiens GN=MSN PE=1 SV=3 - [MOES_HUMAN]	67.7778	12.13	1	6	8	18	8	16	1	1	1	1
P05141	ADP/ATP translocase 2 OS=Homo sapiens GN=SLC25A5 PE=1 SV=7 - [ADT2_HUMAN]	32.8312	12.08	2	1	4	6	4	6
P12236	ADP/ATP translocase 3 OS=Homo sapiens GN=SLC25A6 PE=1 SV=4 - [ADT3_HUMAN]	32.8452	12.08	3	1	4	5	3	4	1	1
P63220	40S ribosomal protein S21 OS=Homo sapiens GN=RPS21 PE=1 SV=1 - [RS21_HUMAN]	9.10557	12.05	1	1	1	1	1	1
P62942	Peptidyl-prolyl cis-trans isomerase FKBP1A OS=Homo sapiens GN=FKBP1A PE=1 SV=2 - [FKB1A_HUMAN]	11.9431	12.04	1	1	1	1	1	1
P62280	40S ribosomal protein S11 OS=Homo sapiens GN=RPS11 PE=1 SV=3 - [RS11_HUMAN]	18.419	12.03	1	2	2	2	2	2
Q99832	T-complex protein 1 subunit eta OS=Homo sapiens GN=CCT7 PE=1 SV=2 - [TCPH_HUMAN]	59.3289	11.97	1	6	6	6	6	6
P34897	Serine hydroxymethyltransferase, mitochondrial OS=Homo sapiens GN=SHMT2 PE=1 SV=3 - [GLYM_HUMAN]	55.9577	11.9	1	4	5	6	3	4	1	1	1	1
P05109	Protein S100-A8 OS=Homo sapiens GN=S100A8 PE=1 SV=1 - [S10A8_HUMAN]	10.8276	11.83	1	1	1	6	1	3	1	1	1	2
P62258	14-3-3 protein epsilon OS=Homo sapiens GN=YWHAE PE=1 SV=1 - [1433E_HUMAN]	29.1554	11.76	1	2	3	9	3	5	2	3	1	1
P26641	Elongation factor 1-gamma OS=Homo sapiens GN=EEF1G PE=1 SV=3 - [EF1G_HUMAN]	50.0871	11.67	1	4	4	9	2	4	3	3	2	2
P07237	Protein disulfide-isomerase OS=Homo sapiens GN=P4HB PE=1 SV=3 - [PDIA1_HUMAN]	57.0807	11.61	1	5	5	7	5	7
P60468	Protein transport protein Sec61 subunit beta OS=Homo sapiens GN=SEC61B PE=1 SV=2 - [SC61B_HUMAN]	9.9681	11.46	1	1	1	1					1	1
P61313	60S ribosomal protein L15 OS=Homo sapiens GN=RPL15 PE=1 SV=2 - [RL15_HUMAN]	24.1311	11.27	1	3	3	5	3	5
P40926	Malate dehydrogenase, mitochondrial OS=Homo sapiens GN=MDH2 PE=1 SV=3 - [MDHM_HUMAN]	35.4807	11.24	1	3	3	3	3	3
P78386	Keratin, type II cuticular Hb5 OS=Homo sapiens GN=KRT85 PE=1 SV=1 - [KRT85_HUMAN]	55.7665	11.05	2	1	5	5					5	5
P49368	T-complex protein 1 subunit gamma OS=Homo sapiens GN=CCT3 PE=1 SV=4 - [TCPG_HUMAN]	60.4953	11.01	1	6	6	9	6	9
P09972	Fructose-bisphosphate aldolase C OS=Homo sapiens GN=ALDOC PE=1 SV=2 - [ALDOC_HUMAN]	39.4312	10.99	2	3	4	6	4	5	1	1
Q14498	RNA-binding protein 39 OS=Homo sapiens GN=RBM39 PE=1 SV=2 - [RBM39_HUMAN]	59.3427	10.94	2	5	5	7	1	1	4	5	1	1
P40925	Malate dehydrogenase, cytoplasmic OS=Homo sapiens GN=MDH1 PE=1 SV=4 - [MDHC_HUMAN]	36.403	10.78	1	3	3	4	3	4
P14625	Endoplasmin OS=Homo sapiens GN=HSP90B1 PE=1 SV=1 - [ENPL_HUMAN]	92.4113	10.71	1	7	8	19	8	14	3	3	2	2
Q96FQ6	Protein S100-A16 OS=Homo sapiens GN=S100A16 PE=1 SV=1 - [S10AG_HUMAN]	11.794	10.68	1	1	1	1	1	1
P10599	Thioredoxin OS=Homo sapiens GN=TXN PE=1 SV=3 - [THIO_HUMAN]	11.7297	10.48	1	2	2	3	2	2			1	1
P02545	Prelamin-A/C OS=Homo sapiens GN=LMNA PE=1 SV=1 - [LMNA_HUMAN]	74.0947	10.39	1	7	7	10	5	6			3	4
Q13162	Peroxiredoxin-4 OS=Homo sapiens GN=PRDX4 PE=1 SV=1 - [PRDX4_HUMAN]	30.5208	10.33	1	2	3	4	3	3			1	1
P48047	ATP synthase subunit O, mitochondrial OS=Homo sapiens GN=ATP5O PE=1 SV=1 - [ATPO_HUMAN]	23.2627	10.33	1	2	2	3	1	1			2	2
P05089	Arginase-1 OS=Homo sapiens GN=ARG1 PE=1 SV=2 - [ARGI1_HUMAN]	34.7133	10.25	1	3	3	5	3	5
P31943	Heterogeneous nuclear ribonucleoprotein H OS=Homo sapiens GN=HNRNPH1 PE=1 SV=4 - [HNRH1_HUMAN]	49.1984	10.24	2	3	3	6	2	2	2	3	1	1
P23528	Cofilin-1 OS=Homo sapiens GN=CFL1 PE=1 SV=3 - [COF1_HUMAN]	18.4907	10.24	2	2	2	8	2	7			1	1
P01598	Ig kappa chain V-I region EU OS=Homo sapiens PE=1 SV=1 - [KV106_HUMAN]	11.7808	10.19	1	1	1	1			1	1
P35268	60S ribosomal protein L22 OS=Homo sapiens GN=RPL22 PE=1 SV=2 - [RL22_HUMAN]	14.7778	10.16	1	1	1	3	1	2	1	1
P07737	Profilin-1 OS=Homo sapiens GN=PFN1 PE=1 SV=2 - [PROF1_HUMAN]	15.0446	10	1	1	1	2	1	2
P35080	Profilin-2 OS=Homo sapiens GN=PFN2 PE=1 SV=3 - [PROF2_HUMAN]	15.0363	10	1	1	1	1	1	1
Q9Y230	RuvB-like 2 OS=Homo sapiens GN=RUVBL2 PE=1 SV=3 - [RUVB2_HUMAN]	51.1246	9.94	1	4	4	8	1	1	4	5	2	2
Q9GZV4	Eukaryotic translation initiation factor 5A-2 OS=Homo sapiens GN=EIF5A2 PE=1 SV=3 - [IF5A2_HUMAN]	16.7822	9.8	3	2	2	2	2	2
P61604	10 kDa heat shock protein, mitochondrial OS=Homo sapiens GN=HSPE1 PE=1 SV=2 - [CH10_HUMAN]	10.9249	9.8	1	1	1	1	1	1
P24534	Elongation factor 1-beta OS=Homo sapiens GN=EEF1B2 PE=1 SV=3 - [EF1B_HUMAN]	24.7483	9.78	1	2	2	5	2	3	1	2
P62820	Ras-related protein Rab-1A OS=Homo sapiens GN=RAB1A PE=1 SV=3 - [RAB1A_HUMAN]	22.6634	9.76	2	2	2	2	2	2
P62805	Histone H4 OS=Homo sapiens GN=HIST1H4A PE=1 SV=2 - [H4_HUMAN]	11.3604	9.71	1	1	1	1					1	1
P18124	60S ribosomal protein L7 OS=Homo sapiens GN=RPL7 PE=1 SV=1 - [RL7_HUMAN]	29.2072	9.68	1	3	3	7	3	5	1	1	1	1
Q9Y597	BTB/POZ domain-containing protein KCTD3 OS=Homo sapiens GN=KCTD3 PE=1 SV=2 - [KCTD3_HUMAN]	88.9287	9.57	1	6	8	17	7	12	3	5
P17987	T-complex protein 1 subunit alpha OS=Homo sapiens GN=TCP1 PE=1 SV=1 - [TCPA_HUMAN]	60.3056	9.53	1	5	5	7	5	7
P05090	Apolipoprotein D OS=Homo sapiens GN=APOD PE=1 SV=1 - [APOD_HUMAN]	21.2618	9.52	1	2	2	4	1	3	1	1
P07910	Heterogeneous nuclear ribonucleoproteins C1/C2 OS=Homo sapiens GN=HNRNPC PE=1 SV=4 - [HNRPC_HUMAN]	33.6495	9.48	2	3	3	6	2	3	2	2	1	1
P05388	60S acidic ribosomal protein P0 OS=Homo sapiens GN=RPLP0 PE=1 SV=1 - [RLA0_HUMAN]	34.2518	9.46	2	3	3	4	3	3	1	1
P0CG05	Ig lambda-2 chain C regions OS=Homo sapiens GN=IGLC2 PE=1 SV=1 - [LAC2_HUMAN]	11.2865	9.43	2	1	1	1					1	1
P01857	Ig gamma-1 chain C region OS=Homo sapiens GN=IGHG1 PE=1 SV=1 - [IGHG1_HUMAN]	36.0832	9.39	4	4	4	249	3	91	3	43	4	115
P22626	Heterogeneous nuclear ribonucleoproteins A2/B1 OS=Homo sapiens GN=HNRNPA2B1 PE=1 SV=2 - [ROA2_HUMAN]	37.4067	9.35	1	4	4	8	4	4	3	3	1	1
Q15233	Non-POU domain-containing octamer-binding protein OS=Homo sapiens GN=NONO PE=1 SV=4 - [NONO_HUMAN]	54.1973	9.34	1	4	4	4	4	4
O60701	UDP-glucose 6-dehydrogenase OS=Homo sapiens GN=UGDH PE=1 SV=1 - [UGDH_HUMAN]	54.9893	9.31	1	4	4	8	3	6	2	2
P07339	Cathepsin D OS=Homo sapiens GN=CTSD PE=1 SV=1 - [CATD_HUMAN]	44.5236	9.22	1	4	4	7	4	5	1	2
P26373	60S ribosomal protein L13 OS=Homo sapiens GN=RPL13 PE=1 SV=4 - [RL13_HUMAN]	24.2465	9	1	2	2	5	2	3	1	2
P62913	60S ribosomal protein L11 OS=Homo sapiens GN=RPL11 PE=1 SV=2 - [RL11_HUMAN]	20.2396	8.99	1	2	2	3	2	3
P60900	Proteasome subunit alpha type-6 OS=Homo sapiens GN=PSMA6 PE=1 SV=1 - [PSA6_HUMAN]	27.3818	8.94	1	2	2	4	2	4
Q02790	Peptidyl-prolyl cis-trans isomerase FKBP4 OS=Homo sapiens GN=FKBP4 PE=1 SV=3 - [FKBP4_HUMAN]	51.7721	8.93	1	4	4	5	4	5
P29692	Elongation factor 1-delta OS=Homo sapiens GN=EEF1D PE=1 SV=5 - [EF1D_HUMAN]	31.1028	8.9	1	2	2	3	2	2	1	1
P37837	Transaldolase OS=Homo sapiens GN=TALDO1 PE=1 SV=2 - [TALDO_HUMAN]	37.5165	8.9	1	3	3	5	2	3	2	2
P06703	Protein S100-A6 OS=Homo sapiens GN=S100A6 PE=1 SV=1 - [S10A6_HUMAN]	10.1733	8.89	1	1	1	4	1	3			1	1
P68871	Hemoglobin subunit beta OS=Homo sapiens GN=HBB PE=1 SV=2 - [HBB_HUMAN]	15.9883	8.84	1	1	1	1			1	1
P28072	Proteasome subunit beta type-6 OS=Homo sapiens GN=PSMB6 PE=1 SV=4 - [PSB6_HUMAN]	25.3414	8.79	1	2	2	5	2	4			1	1
Q8TBC3	SH3KBP1-binding protein 1 OS=Homo sapiens GN=SHKBP1 PE=1 SV=2 - [SHKB1_HUMAN]	76.2959	8.77	1	4	6	7	6	7
P62701	40S ribosomal protein S4, X isoform OS=Homo sapiens GN=RPS4X PE=1 SV=2 - [RS4X_HUMAN]	29.5791	8.75	2	3	3	5	3	4	1	1
Q8IZP2	Putative protein FAM10A4 OS=Homo sapiens GN=ST13P4 PE=5 SV=1 - [ST134_HUMAN]	27.3897	8.75	3	2	2	2			2	2
Q15365	Poly(rC)-binding protein 1 OS=Homo sapiens GN=PCBP1 PE=1 SV=2 - [PCBP1_HUMAN]	37.4739	8.71	3	3	3	16	3	7	3	6	2	3
P61247	40S ribosomal protein S3a OS=Homo sapiens GN=RPS3A PE=1 SV=2 - [RS3A_HUMAN]	29.9257	8.71	1	2	2	2	1	1	1	1
P52209	6-phosphogluconate dehydrogenase, decarboxylating OS=Homo sapiens GN=PGD PE=1 SV=3 - [6PGD_HUMAN]	53.106	8.7	1	3	3	5	2	3	2	2
Q96PK6	RNA-binding protein 14 OS=Homo sapiens GN=RBM14 PE=1 SV=2 - [RBM14_HUMAN]	69.4489	8.67	1	5	5	7	4	4			3	3
P10515	Dihydrolipoyllysine-residue acetyltransferase component of pyruvate dehydrogenase complex, mitochondrial OS=Homo sapiens GN=DLAT PE=1 SV=3 - [ODP2_HUMAN]	68.9531	8.66	1	6	6	14	4	9	3	3	2	2
P50402	Emerin OS=Homo sapiens GN=EMD PE=1 SV=1 - [EMD_HUMAN]	28.9759	8.66	1	2	2	3	2	2	1	1
Q8NC51	Plasminogen activator inhibitor 1 RNA-binding protein OS=Homo sapiens GN=SERBP1 PE=1 SV=2 - [PAIRB_HUMAN]	44.9385	8.58	1	3	3	7	2	4	3	3
P30086	Phosphatidylethanolamine-binding protein 1 OS=Homo sapiens GN=PEBP1 PE=1 SV=3 - [PEBP1_HUMAN]	21.0437	8.56	1	2	2	2	2	2
Q04941	Proteolipid protein 2 OS=Homo sapiens GN=PLP2 PE=1 SV=1 - [PLP2_HUMAN]	16.6797	8.55	1	1	1	1	1	1
P62316	Small nuclear ribonucleoprotein Sm D2 OS=Homo sapiens GN=SNRPD2 PE=1 SV=1 - [SMD2_HUMAN]	13.5182	8.47	1	1	1	1	1	1
O60293	Zinc finger C3H1 domain-containing protein OS=Homo sapiens GN=ZFC3H1 PE=1 SV=3 - [ZC3H1_HUMAN]	226.214	8.45	1	15	15	31	14	19	8	12
Q9NWB6	Arginine and glutamate-rich protein 1 OS=Homo sapiens GN=ARGLU1 PE=1 SV=1 - [ARGL1_HUMAN]	33.1968	8.42	1	3	3	6	2	3	2	2	1	1
P61769	Beta-2-microglobulin OS=Homo sapiens GN=B2M PE=1 SV=1 - [B2MG_HUMAN]	13.7059	8.4	1	1	1	1	1	1
P60842	Eukaryotic initiation factor 4A-I OS=Homo sapiens GN=EIF4A1 PE=1 SV=1 - [IF4A1_HUMAN]	46.1246	8.37	3	3	3	6	2	3	2	2	1	1
Q6ZVX7	F-box only protein 50 OS=Homo sapiens GN=NCCRP1 PE=1 SV=1 - [FBX50_HUMAN]	30.8279	8.36	1	2	2	2	2	2
P62750	60S ribosomal protein L23a OS=Homo sapiens GN=RPL23A PE=1 SV=1 - [RL23A_HUMAN]	17.6841	8.33	1	1	1	1	1	1
O75347	Tubulin-specific chaperone A OS=Homo sapiens GN=TBCA PE=1 SV=3 - [TBCA_HUMAN]	12.8467	8.33	1	1	1	1	1	1
P15259	Phosphoglycerate mutase 2 OS=Homo sapiens GN=PGAM2 PE=1 SV=3 - [PGAM2_HUMAN]	28.7478	8.3	2	2	2	6	2	4	2	2
Q7L2H7	Eukaryotic translation initiation factor 3 subunit M OS=Homo sapiens GN=EIF3M PE=1 SV=1 - [EIF3M_HUMAN]	42.4758	8.29	1	4	4	6	4	4	2	2
P01620	Ig kappa chain V-III region SIE OS=Homo sapiens PE=1 SV=1 - [KV302_HUMAN]	11.7678	8.26	4	1	1	1					1	1
O75874	Isocitrate dehydrogenase [NADP] cytoplasmic OS=Homo sapiens GN=IDH1 PE=1 SV=2 - [IDHC_HUMAN]	46.6295	8.21	1	3	3	5	2	2	3	3
Q02413	Desmoglein-1 OS=Homo sapiens GN=DSG1 PE=1 SV=2 - [DSG1_HUMAN]	113.676	8.2	1	7	7	19	7	18			1	1
P62851	40S ribosomal protein S25 OS=Homo sapiens GN=RPS25 PE=1 SV=1 - [RS25_HUMAN]	13.7337	8	1	1	1	1	1	1
P62318	Small nuclear ribonucleoprotein Sm D3 OS=Homo sapiens GN=SNRPD3 PE=1 SV=1 - [SMD3_HUMAN]	13.9073	7.94	1	1	1	1	1	1
P26447	Protein S100-A4 OS=Homo sapiens GN=S100A4 PE=1 SV=1 - [S10A4_HUMAN]	11.7207	7.92	1	1	1	1	1	1
Q6NVV1	Putative 60S ribosomal protein L13a protein RPL13AP3 OS=Homo sapiens GN=RPL13AP3 PE=5 SV=1 - [R13P3_HUMAN]	12.1269	7.84	2	1	1	1			1	1
P50991	T-complex protein 1 subunit delta OS=Homo sapiens GN=CCT4 PE=1 SV=4 - [TCPD_HUMAN]	57.8878	7.79	1	4	4	5	4	5
P35232	Prohibitin OS=Homo sapiens GN=PHB PE=1 SV=1 - [PHB_HUMAN]	29.7859	7.72	1	2	2	4	2	3	1	1
P49207	60S ribosomal protein L34 OS=Homo sapiens GN=RPL34 PE=1 SV=3 - [RL34_HUMAN]	13.2845	7.69	1	1	1	1	1	1
A0M8Q6	Ig lambda-7 chain C region OS=Homo sapiens GN=IGLC7 PE=1 SV=2 - [LAC7_HUMAN]	11.2956	7.55	3	1	1	4	1	1			1	3
Q13835	Plakophilin-1 OS=Homo sapiens GN=PKP1 PE=1 SV=2 - [PKP1_HUMAN]	82.8078	7.5	1	5	5	7	5	7
Q99613	Eukaryotic translation initiation factor 3 subunit C OS=Homo sapiens GN=EIF3C PE=1 SV=1 - [EIF3C_HUMAN]	105.278	7.45	2	6	6	10	4	7	3	3
P46776	60S ribosomal protein L27a OS=Homo sapiens GN=RPL27A PE=1 SV=2 - [RL27A_HUMAN]	16.551	7.43	1	1	1	3	1	2			1	1
Q99497	Protein DJ-1 OS=Homo sapiens GN=PARK7 PE=1 SV=2 - [PARK7_HUMAN]	19.8785	7.41	1	2	2	2	2	2
P01608	Ig kappa chain V-I region Roy OS=Homo sapiens PE=1 SV=1 - [KV116_HUMAN]	11.7748	7.41	1	1	1	16	1	4	1	3	1	9
Q9UHX1	Poly(U)-binding-splicing factor PUF60 OS=Homo sapiens GN=PUF60 PE=1 SV=1 - [PUF60_HUMAN]	59.8376	7.33	1	4	4	5	4	5
P52272	Heterogeneous nuclear ribonucleoprotein M OS=Homo sapiens GN=HNRNPM PE=1 SV=3 - [HNRPM_HUMAN]	77.4643	7.26	1	5	5	7	1	1	3	3	2	3
P22492	Histone H1t OS=Homo sapiens GN=HIST1H1T PE=2 SV=4 - [H1T_HUMAN]	22.0057	7.25	5	1	1	1			1	1
Q96C01	Protein FAM136A OS=Homo sapiens GN=FAM136A PE=1 SV=1 - [F136A_HUMAN]	15.6307	7.25	1	1	1	1	1	1
P61088	Ubiquitin-conjugating enzyme E2 N OS=Homo sapiens GN=UBE2N PE=1 SV=1 - [UBE2N_HUMAN]	17.127	7.24	2	1	1	1	1	1
P29401	Transketolase OS=Homo sapiens GN=TKT PE=1 SV=3 - [TKT_HUMAN]	67.8347	7.22	1	4	4	5	4	4	1	1
P62899	60S ribosomal protein L31 OS=Homo sapiens GN=RPL31 PE=1 SV=1 - [RL31_HUMAN]	14.4539	7.2	1	1	1	1					1	1
Q14152	Eukaryotic translation initiation factor 3 subunit A OS=Homo sapiens GN=EIF3A PE=1 SV=1 - [EIF3A_HUMAN]	166.468	7.16	1	11	11	17	10	13	3	4
P62424	60S ribosomal protein L7a OS=Homo sapiens GN=RPL7A PE=1 SV=2 - [RL7A_HUMAN]	29.977	7.14	1	2	2	3	1	1	2	2
P08865	40S ribosomal protein SA OS=Homo sapiens GN=RPSA PE=1 SV=4 - [RSSA_HUMAN]	32.8334	7.12	1	2	2	9	2	5	2	2	1	2
P01891	HLA class I histocompatibility antigen, A-68 alpha chain OS=Homo sapiens GN=HLA-A PE=1 SV=4 - [1A68_HUMAN]	40.8831	7.12	3	2	2	3	2	2	1	1
P0C0S5	Histone H2A.Z OS=Homo sapiens GN=H2AFZ PE=1 SV=2 - [H2AZ_HUMAN]	13.5446	7.03	15	1	1	7	1	2	1	1	1	4
P05198	Eukaryotic translation initiation factor 2 subunit 1 OS=Homo sapiens GN=EIF2S1 PE=1 SV=3 - [IF2A_HUMAN]	36.0894	6.98	1	2	2	6	2	2	2	3	1	1
O00571	ATP-dependent RNA helicase DDX3X OS=Homo sapiens GN=DDX3X PE=1 SV=3 - [DDX3X_HUMAN]	73.198	6.95	3	4	4	4	4	4
P19338	Nucleolin OS=Homo sapiens GN=NCL PE=1 SV=3 - [NUCL_HUMAN]	76.5684	6.9	1	5	5	7	5	7
P39019	40S ribosomal protein S19 OS=Homo sapiens GN=RPS19 PE=1 SV=2 - [RS19_HUMAN]	16.0505	6.9	1	1	1	1	1	1
Q8WVV4	Protein POF1B OS=Homo sapiens GN=POF1B PE=1 SV=3 - [POF1B_HUMAN]	68.0224	6.79	1	4	4	5	4	5
Q96LD4	Tripartite motif-containing protein 47 OS=Homo sapiens GN=TRIM47 PE=1 SV=2 - [TRI47_HUMAN]	69.4879	6.74	1	4	4	4	3	3	1	1
P49748	Very long-chain specific acyl-CoA dehydrogenase, mitochondrial OS=Homo sapiens GN=ACADVL PE=1 SV=1 - [ACADV_HUMAN]	70.3454	6.72	1	4	4	5	4	5
Q99623	Prohibitin-2 OS=Homo sapiens GN=PHB2 PE=1 SV=2 - [PHB2_HUMAN]	33.2759	6.69	1	2	2	2	2	2
P60981	Destrin OS=Homo sapiens GN=DSTN PE=1 SV=3 - [DEST_HUMAN]	18.4935	6.67	1	1	1	1	1	1
P30464	HLA class I histocompatibility antigen, B-15 alpha chain OS=Homo sapiens GN=HLA-B PE=1 SV=2 - [1B15_HUMAN]	40.363	6.63	58	2	2	4	2	3	1	1
P61353	60S ribosomal protein L27 OS=Homo sapiens GN=RPL27 PE=1 SV=2 - [RL27_HUMAN]	15.7877	6.62	1	1	1	1	1	1
Q96HS1	Serine/threonine-protein phosphatase PGAM5, mitochondrial OS=Homo sapiens GN=PGAM5 PE=1 SV=2 - [PGAM5_HUMAN]	31.9846	6.57	1	2	2	2	1	1	1	1
P08174	Complement decay-accelerating factor OS=Homo sapiens GN=CD55 PE=1 SV=4 - [DAF_HUMAN]	41.3736	6.56	1	3	3	3	2	2			1	1
P42285	Superkiller viralicidic activity 2-like 2 OS=Homo sapiens GN=SKIV2L2 PE=1 SV=3 - [SK2L2_HUMAN]	117.729	6.53	1	6	6	10	6	7	2	3
Q13765	Nascent polypeptide-associated complex subunit alpha OS=Homo sapiens GN=NACA PE=1 SV=1 - [NACA_HUMAN]	23.3697	6.51	2	1	1	1			1	1
P08559	Pyruvate dehydrogenase E1 component subunit alpha, somatic form, mitochondrial OS=Homo sapiens GN=PDHA1 PE=1 SV=3 - [ODPA_HUMAN]	43.2676	6.41	2	3	3	4	2	3	1	1
P11177	Pyruvate dehydrogenase E1 component subunit beta, mitochondrial OS=Homo sapiens GN=PDHB PE=1 SV=3 - [ODPB_HUMAN]	39.208	6.41	1	2	2	7	2	3	2	4
O15371	Eukaryotic translation initiation factor 3 subunit D OS=Homo sapiens GN=EIF3D PE=1 SV=1 - [EIF3D_HUMAN]	63.9324	6.39	1	3	3	5	3	4	1	1
P17844	Probable ATP-dependent RNA helicase DDX5 OS=Homo sapiens GN=DDX5 PE=1 SV=1 - [DDX5_HUMAN]	69.1047	6.35	2	4	4	7	4	7
P69905	Hemoglobin subunit alpha OS=Homo sapiens GN=HBA1 PE=1 SV=2 - [HBA_HUMAN]	15.2479	6.34	1	1	1	1			1	1
P47755	F-actin-capping protein subunit alpha-2 OS=Homo sapiens GN=CAPZA2 PE=1 SV=3 - [CAZA2_HUMAN]	32.9286	6.29	2	2	2	2			2	2
Q8IW75	Serpin A12 OS=Homo sapiens GN=SERPINA12 PE=1 SV=1 - [SPA12_HUMAN]	47.145	6.28	1	3	3	3	3	3
P62241	40S ribosomal protein S8 OS=Homo sapiens GN=RPS8 PE=1 SV=2 - [RS8_HUMAN]	24.1902	6.25	1	1	1	2	1	1	1	1
Q08188	Protein-glutamine gamma-glutamyltransferase E OS=Homo sapiens GN=TGM3 PE=1 SV=4 - [TGM3_HUMAN]	76.5836	6.2	1	4	4	4	4	4
P02786	Transferrin receptor protein 1 OS=Homo sapiens GN=TFRC PE=1 SV=2 - [TFR1_HUMAN]	84.8179	6.18	1	4	4	11	4	9	1	1	1	1
P78371	T-complex protein 1 subunit beta OS=Homo sapiens GN=CCT2 PE=1 SV=4 - [TCPB_HUMAN]	57.4521	6.17	1	3	3	3	3	3
P80723	Brain acid soluble protein 1 OS=Homo sapiens GN=BASP1 PE=1 SV=2 - [BASP1_HUMAN]	22.68	6.17	1	1	1	2	1	2
P55884	Eukaryotic translation initiation factor 3 subunit B OS=Homo sapiens GN=EIF3B PE=1 SV=3 - [EIF3B_HUMAN]	92.4238	6.14	1	5	5	7	4	5	2	2
P06748	Nucleophosmin OS=Homo sapiens GN=NPM1 PE=1 SV=2 - [NPM_HUMAN]	32.5548	6.12	1	2	2	4	1	1	2	2	1	1
P18085	ADP-ribosylation factor 4 OS=Homo sapiens GN=ARF4 PE=1 SV=3 - [ARF4_HUMAN]	20.4977	6.11	4	1	1	1					1	1
P06744	Glucose-6-phosphate isomerase OS=Homo sapiens GN=GPI PE=1 SV=4 - [G6PI_HUMAN]	63.1072	6.09	2	4	4	10	4	9			1	1
Q9Y5K5	Ubiquitin carboxyl-terminal hydrolase isozyme L5 OS=Homo sapiens GN=UCHL5 PE=1 SV=3 - [UCHL5_HUMAN]	37.583	6.08	1	2	2	3	2	2	1	1
P12268	Inosine-5'-monophosphate dehydrogenase 2 OS=Homo sapiens GN=IMPDH2 PE=1 SV=2 - [IMDH2_HUMAN]	55.7696	6.03	2	3	3	4	2	2	2	2
Q5D862	Filaggrin-2 OS=Homo sapiens GN=FLG2 PE=1 SV=1 - [FILA2_HUMAN]	247.928	5.98	1	9	9	16	9	13	1	1	1	2
P11940	Polyadenylate-binding protein 1 OS=Homo sapiens GN=PABPC1 PE=1 SV=2 - [PABP1_HUMAN]	70.6259	5.97	3	3	4	6	4	4	1	1	1	1
P08758	Annexin A5 OS=Homo sapiens GN=ANXA5 PE=1 SV=2 - [ANXA5_HUMAN]	35.9144	5.94	1	2	2	6	2	4	2	2
P41091	Eukaryotic translation initiation factor 2 subunit 3 OS=Homo sapiens GN=EIF2S3 PE=1 SV=3 - [IF2G_HUMAN]	51.0772	5.93	2	3	3	6	3	4	2	2
Q15120	[Pyruvate dehydrogenase (acetyl-transferring)] kinase isozyme 3, mitochondrial OS=Homo sapiens GN=PDK3 PE=1 SV=1 - [PDK3_HUMAN]	46.9091	5.91	1	2	2	3	1	1	1	2
P37108	Signal recognition particle 14 kDa protein OS=Homo sapiens GN=SRP14 PE=1 SV=2 - [SRP14_HUMAN]	14.5608	5.88	1	1	1	1	1	1
P19105	Myosin regulatory light chain 12A OS=Homo sapiens GN=MYL12A PE=1 SV=2 - [ML12A_HUMAN]	19.7815	5.85	2	1	1	2					1	2
P01815	Ig heavy chain V-II region COR OS=Homo sapiens PE=1 SV=1 - [HV202_HUMAN]	13.2176	5.83	1	1	1	1					1	1
Q9UJV9	Probable ATP-dependent RNA helicase DDX41 OS=Homo sapiens GN=DDX41 PE=1 SV=2 - [DDX41_HUMAN]	69.793	5.79	1	3	3	3	3	3
P25311	Zinc-alpha-2-glycoprotein OS=Homo sapiens GN=AZGP1 PE=1 SV=2 - [ZA2G_HUMAN]	34.2371	5.7	1	2	2	3	2	3
Q8IVT2	Mitotic interactor and substrate of PLK1 OS=Homo sapiens GN=MISP PE=1 SV=1 - [MISP_HUMAN]	75.311	5.6	1	3	3	6	3	3	1	1	2	2
Q9UI30	tRNA methyltransferase 112 homolog OS=Homo sapiens GN=TRMT112 PE=1 SV=1 - [TR112_HUMAN]	14.1903	5.6	1	1	1	1	1	1
Q96AE4	Far upstream element-binding protein 1 OS=Homo sapiens GN=FUBP1 PE=1 SV=3 - [FUBP1_HUMAN]	67.5185	5.59	1	3	3	4	3	4
P36957	Dihydrolipoyllysine-residue succinyltransferase component of 2-oxoglutarate dehydrogenase complex, mitochondrial OS=Homo sapiens GN=DLST PE=1 SV=4 - [ODO2_HUMAN]	48.7245	5.52	1	2	2	4	2	2	1	1	1	1
Q00325	Phosphate carrier protein, mitochondrial OS=Homo sapiens GN=SLC25A3 PE=1 SV=2 - [MPCP_HUMAN]	40.0687	5.52	1	2	2	5	2	3	2	2
P54105	Methylosome subunit pICln OS=Homo sapiens GN=CLNS1A PE=1 SV=1 - [ICLN_HUMAN]	26.1989	5.49	1	1	1	1			1	1
Q9NZT1	Calmodulin-like protein 5 OS=Homo sapiens GN=CALML5 PE=1 SV=2 - [CALL5_HUMAN]	15.8828	5.48	1	1	1	1	1	1
Q01081	Splicing factor U2AF 35 kDa subunit OS=Homo sapiens GN=U2AF1 PE=1 SV=3 - [U2AF1_HUMAN]	27.8545	5.42	1	1	1	1			1	1
Q9BZG1	Ras-related protein Rab-34 OS=Homo sapiens GN=RAB34 PE=1 SV=1 - [RAB34_HUMAN]	29.0259	5.41	1	1	1	4	1	2	1	2
P48643	T-complex protein 1 subunit epsilon OS=Homo sapiens GN=CCT5 PE=1 SV=1 - [TCPE_HUMAN]	59.6328	5.36	1	3	3	7	3	5	1	1	1	1
P21266	Glutathione S-transferase Mu 3 OS=Homo sapiens GN=GSTM3 PE=1 SV=3 - [GSTM3_HUMAN]	26.5421	5.33	1	1	1	1	1	1
P51149	Ras-related protein Rab-7a OS=Homo sapiens GN=RAB7A PE=1 SV=1 - [RAB7A_HUMAN]	23.4748	5.31	1	1	1	1	1	1
P40227	T-complex protein 1 subunit zeta OS=Homo sapiens GN=CCT6A PE=1 SV=3 - [TCPZ_HUMAN]	57.9876	5.27	1	3	3	3	3	3
P60953	Cell division control protein 42 homolog OS=Homo sapiens GN=CDC42 PE=1 SV=2 - [CDC42_HUMAN]	21.245	5.24	1	1	1	2	1	2
O95816	BAG family molecular chaperone regulator 2 OS=Homo sapiens GN=BAG2 PE=1 SV=1 - [BAG2_HUMAN]	23.7572	5.21	1	2	2	6	2	3	1	1	2	2
Q6NXT2	Histone H3.3C OS=Homo sapiens GN=H3F3C PE=1 SV=3 - [H3C_HUMAN]	15.2044	5.19	5	1	1	4	1	2	1	2
P13667	Protein disulfide-isomerase A4 OS=Homo sapiens GN=PDIA4 PE=1 SV=2 - [PDIA4_HUMAN]	72.887	5.12	1	3	3	4	3	4
P49411	Elongation factor Tu, mitochondrial OS=Homo sapiens GN=TUFM PE=1 SV=2 - [EFTU_HUMAN]	49.5102	5.09	1	2	2	3			2	2	1	1
P62491	Ras-related protein Rab-11A OS=Homo sapiens GN=RAB11A PE=1 SV=3 - [RB11A_HUMAN]	24.3784	5.09	2	1	1	1	1	1
Q99615	DnaJ homolog subfamily C member 7 OS=Homo sapiens GN=DNAJC7 PE=1 SV=2 - [DNJC7_HUMAN]	56.4047	5.06	1	2	2	2	2	2
Q9UBQ5	Eukaryotic translation initiation factor 3 subunit K OS=Homo sapiens GN=EIF3K PE=1 SV=1 - [EIF3K_HUMAN]	25.0434	5.05	1	1	1	1	1	1
Q9BRD0	BUD13 homolog OS=Homo sapiens GN=BUD13 PE=1 SV=1 - [BUD13_HUMAN]	70.4783	5.01	1	3	3	4	3	3	1	1
Q13310	Polyadenylate-binding protein 4 OS=Homo sapiens GN=PABPC4 PE=1 SV=1 - [PABP4_HUMAN]	70.7381	4.97	2	2	3	3	3	3
P42330	Aldo-keto reductase family 1 member C3 OS=Homo sapiens GN=AKR1C3 PE=1 SV=4 - [AK1C3_HUMAN]	36.8298	4.95	4	2	2	4	2	3			1	1
Q9BU76	Multiple myeloma tumor-associated protein 2 OS=Homo sapiens GN=MMTAG2 PE=1 SV=1 - [MMTA2_HUMAN]	29.3939	4.94	1	1	1	2	1	1	1	1
Q9BVC6	Transmembrane protein 109 OS=Homo sapiens GN=TMEM109 PE=1 SV=1 - [TM109_HUMAN]	26.1936	4.94	1	1	1	1					1	1
P09651	Heterogeneous nuclear ribonucleoprotein A1 OS=Homo sapiens GN=HNRNPA1 PE=1 SV=5 - [ROA1_HUMAN]	38.7231	4.84	1	1	1	2	1	1	1	1
Q16181	Septin-7 OS=Homo sapiens GN=SEPT7 PE=1 SV=2 - [SEPT7_HUMAN]	50.648	4.81	1	2	2	2	2	2
P36871	Phosphoglucomutase-1 OS=Homo sapiens GN=PGM1 PE=1 SV=3 - [PGM1_HUMAN]	61.4105	4.8	1	2	2	2	2	2
P58107	Epiplakin OS=Homo sapiens GN=EPPK1 PE=1 SV=2 - [EPIPL_HUMAN]	555.279	4.77	1	3	5	6	4	4			2	2
P48507	Glutamate--cysteine ligase regulatory subunit OS=Homo sapiens GN=GCLM PE=1 SV=1 - [GSH0_HUMAN]	30.7078	4.74	1	1	1	1	1	1
P50395	Rab GDP dissociation inhibitor beta OS=Homo sapiens GN=GDI2 PE=1 SV=2 - [GDIB_HUMAN]	50.6309	4.72	2	2	2	3	1	1	2	2
P38117	Electron transfer flavoprotein subunit beta OS=Homo sapiens GN=ETFB PE=1 SV=3 - [ETFB_HUMAN]	27.8262	4.71	1	1	1	1	1	1
Q96P63	Serpin B12 OS=Homo sapiens GN=SERPINB12 PE=1 SV=1 - [SPB12_HUMAN]	46.2471	4.69	1	2	2	3	2	3
O43175	D-3-phosphoglycerate dehydrogenase OS=Homo sapiens GN=PHGDH PE=1 SV=4 - [SERA_HUMAN]	56.6144	4.69	1	2	2	2	2	2
Q9NSB2	Keratin, type II cuticular Hb4 OS=Homo sapiens GN=KRT84 PE=2 SV=2 - [KRT84_HUMAN]	64.8015	4.67	2	1	4	11	3	6			3	5
Q16658	Fascin OS=Homo sapiens GN=FSCN1 PE=1 SV=3 - [FSCN1_HUMAN]	54.4961	4.67	1	2	2	3	2	2	1	1
P35241	Radixin OS=Homo sapiens GN=RDX PE=1 SV=1 - [RADI_HUMAN]	68.5214	4.63	1	1	3	5	3	5
O60506	Heterogeneous nuclear ribonucleoprotein Q OS=Homo sapiens GN=SYNCRIP PE=1 SV=2 - [HNRPQ_HUMAN]	69.5596	4.49	2	3	3	4	3	4
O00429	Dynamin-1-like protein OS=Homo sapiens GN=DNM1L PE=1 SV=2 - [DNM1L_HUMAN]	81.8261	4.48	1	3	3	4	3	3	1	1
P43487	Ran-specific GTPase-activating protein OS=Homo sapiens GN=RANBP1 PE=1 SV=1 - [RANG_HUMAN]	23.2956	4.48	1	1	1	1	1	1
P36578	60S ribosomal protein L4 OS=Homo sapiens GN=RPL4 PE=1 SV=5 - [RL4_HUMAN]	47.6674	4.45	1	2	2	6	1	4	1	1	1	1
P15311	Ezrin OS=Homo sapiens GN=EZR PE=1 SV=4 - [EZRI_HUMAN]	69.3697	4.44	1	1	3	6	3	5			1	1
O14818	Proteasome subunit alpha type-7 OS=Homo sapiens GN=PSMA7 PE=1 SV=1 - [PSA7_HUMAN]	27.8696	4.44	2	1	1	1	1	1
Q08554	Desmocollin-1 OS=Homo sapiens GN=DSC1 PE=1 SV=2 - [DSC1_HUMAN]	99.9238	4.36	1	3	3	4	3	4
Q9UQ80	Proliferation-associated protein 2G4 OS=Homo sapiens GN=PA2G4 PE=1 SV=3 - [PA2G4_HUMAN]	43.7592	4.31	1	2	2	2	1	1	1	1
Q9H3N1	Thioredoxin-related transmembrane protein 1 OS=Homo sapiens GN=TMX1 PE=1 SV=1 - [TMX1_HUMAN]	31.7708	4.29	1	1	1	1	1	1
P62917	60S ribosomal protein L8 OS=Homo sapiens GN=RPL8 PE=1 SV=2 - [RL8_HUMAN]	28.0073	4.28	1	1	1	3	1	1			1	2
Q7Z3Z0	Keratin, type I cytoskeletal 25 OS=Homo sapiens GN=KRT25 PE=1 SV=1 - [K1C25_HUMAN]	49.2874	4.22	3	1	3	131	3	52	2	23	2	56
P23284	Peptidyl-prolyl cis-trans isomerase B OS=Homo sapiens GN=PPIB PE=1 SV=2 - [PPIB_HUMAN]	23.7275	4.17	1	1	1	1					1	1
P28066	Proteasome subunit alpha type-5 OS=Homo sapiens GN=PSMA5 PE=1 SV=3 - [PSA5_HUMAN]	26.3942	4.15	1	1	1	2	1	2
P10696	Alkaline phosphatase, placental-like OS=Homo sapiens GN=ALPPL2 PE=1 SV=4 - [PPBN_HUMAN]	57.341	4.14	2	1	2	4	1	1	1	1	1	2
P18206	Vinculin OS=Homo sapiens GN=VCL PE=1 SV=4 - [VINC_HUMAN]	123.722	4.14	1	4	4	5	4	4	1	1
P62081	40S ribosomal protein S7 OS=Homo sapiens GN=RPS7 PE=1 SV=1 - [RS7_HUMAN]	22.1133	4.12	1	1	1	1					1	1
P29508	Serpin B3 OS=Homo sapiens GN=SERPINB3 PE=1 SV=2 - [SPB3_HUMAN]	44.5365	4.1	2	2	2	2	2	2
O75390	Citrate synthase, mitochondrial OS=Homo sapiens GN=CS PE=1 SV=2 - [CISY_HUMAN]	51.6795	4.08	1	2	2	4	2	4
Q07955	Serine/arginine-rich splicing factor 1 OS=Homo sapiens GN=SRSF1 PE=1 SV=2 - [SRSF1_HUMAN]	27.7278	4.03	1	1	1	1	1	1
P14314	Glucosidase 2 subunit beta OS=Homo sapiens GN=PRKCSH PE=1 SV=2 - [GLU2B_HUMAN]	59.3878	3.98	1	2	2	2	2	2
P22061	Protein-L-isoaspartate(D-aspartate) O-methyltransferase OS=Homo sapiens GN=PCMT1 PE=1 SV=4 - [PIMT_HUMAN]	24.6206	3.96	1	1	1	8	1	3	1	2	1	3
Q14103	Heterogeneous nuclear ribonucleoprotein D0 OS=Homo sapiens GN=HNRNPD PE=1 SV=1 - [HNRPD_HUMAN]	38.4103	3.94	1	1	1	1	1	1
P46782	40S ribosomal protein S5 OS=Homo sapiens GN=RPS5 PE=1 SV=4 - [RS5_HUMAN]	22.8621	3.92	1	1	1	1	1	1
P16083	Ribosyldihydronicotinamide dehydrogenase [quinone] OS=Homo sapiens GN=NQO2 PE=1 SV=5 - [NQO2_HUMAN]	25.902	3.9	1	1	1	1	1	1
Q16698	2,4-dienoyl-CoA reductase, mitochondrial OS=Homo sapiens GN=DECR1 PE=1 SV=1 - [DECR_HUMAN]	36.0448	3.88	1	1	1	2	1	1	1	1
P31153	S-adenosylmethionine synthase isoform type-2 OS=Homo sapiens GN=MAT2A PE=1 SV=1 - [METK2_HUMAN]	43.6333	3.8	1	1	1	1			1	1
P09923	Intestinal-type alkaline phosphatase OS=Homo sapiens GN=ALPI PE=1 SV=2 - [PPBI_HUMAN]	56.7764	3.79	1	1	2	4			1	1	2	3
P19474	E3 ubiquitin-protein ligase TRIM21 OS=Homo sapiens GN=TRIM21 PE=1 SV=1 - [RO52_HUMAN]	54.1351	3.79	1	2	2	2					2	2
Q08380	Galectin-3-binding protein OS=Homo sapiens GN=LGALS3BP PE=1 SV=1 - [LG3BP_HUMAN]	65.2893	3.76	1	2	2	3	2	3
Q9UHD8	Septin-9 OS=Homo sapiens GN=SEPT9 PE=1 SV=2 - [SEPT9_HUMAN]	65.3608	3.75	1	2	2	4	2	3	1	1
Q9NSD9	Phenylalanine--tRNA ligase beta subunit OS=Homo sapiens GN=FARSB PE=1 SV=3 - [SYFB_HUMAN]	66.0735	3.74	1	2	2	3	2	3
P29590	Protein PML OS=Homo sapiens GN=PML PE=1 SV=3 - [PML_HUMAN]	97.4889	3.74	1	3	3	3	1	1	2	2
P14866	Heterogeneous nuclear ribonucleoprotein L OS=Homo sapiens GN=HNRNPL PE=1 SV=2 - [HNRPL_HUMAN]	64.0924	3.74	1	2	2	2	2	2
P35579	Myosin-9 OS=Homo sapiens GN=MYH9 PE=1 SV=4 - [MYH9_HUMAN]	226.392	3.72	2	5	7	14	4	4	5	5	4	5
P62906	60S ribosomal protein L10a OS=Homo sapiens GN=RPL10A PE=1 SV=2 - [RL10A_HUMAN]	24.8155	3.69	1	1	1	1	1	1
Q15773	Myeloid leukemia factor 2 OS=Homo sapiens GN=MLF2 PE=1 SV=1 - [MLF2_HUMAN]	28.1292	3.63	1	1	1	1			1	1
Q01130	Serine/arginine-rich splicing factor 2 OS=Homo sapiens GN=SRSF2 PE=1 SV=4 - [SRSF2_HUMAN]	25.4612	3.62	2	1	1	2	1	1	1	1
Q96QA5	Gasdermin-A OS=Homo sapiens GN=GSDMA PE=1 SV=4 - [GSDMA_HUMAN]	49.3338	3.6	1	2	2	4	2	4
P25788	Proteasome subunit alpha type-3 OS=Homo sapiens GN=PSMA3 PE=1 SV=2 - [PSA3_HUMAN]	28.4151	3.53	1	1	1	1	1	1
P31948	Stress-induced-phosphoprotein 1 OS=Homo sapiens GN=STIP1 PE=1 SV=1 - [STIP1_HUMAN]	62.5994	3.5	1	2	2	2	2	2
P31942	Heterogeneous nuclear ribonucleoprotein H3 OS=Homo sapiens GN=HNRNPH3 PE=1 SV=2 - [HNRH3_HUMAN]	36.9031	3.47	1	1	1	2	1	1	1	1
P09525	Annexin A4 OS=Homo sapiens GN=ANXA4 PE=1 SV=4 - [ANXA4_HUMAN]	35.8601	3.45	1	1	1	1	1	1
P40121	Macrophage-capping protein OS=Homo sapiens GN=CAPG PE=1 SV=2 - [CAPG_HUMAN]	38.4745	3.45	1	1	1	2	1	1	1	1
Q01105	Protein SET OS=Homo sapiens GN=SET PE=1 SV=3 - [SET_HUMAN]	33.4687	3.45	2	1	1	2	1	1			1	1
P48634	Protein PRRC2A OS=Homo sapiens GN=PRRC2A PE=1 SV=3 - [PRC2A_HUMAN]	228.724	3.43	2	6	7	10	4	4	5	6
P55735	Protein SEC13 homolog OS=Homo sapiens GN=SEC13 PE=1 SV=3 - [SEC13_HUMAN]	35.5181	3.42	1	1	1	1			1	1
O43707	Alpha-actinin-4 OS=Homo sapiens GN=ACTN4 PE=1 SV=2 - [ACTN4_HUMAN]	104.788	3.4	3	3	3	3	3	3
P30153	Serine/threonine-protein phosphatase 2A 65 kDa regulatory subunit A alpha isoform OS=Homo sapiens GN=PPP2R1A PE=1 SV=4 - [2AAA_HUMAN]	65.2669	3.4	1	2	2	4	2	4
Q16637	Survival motor neuron protein OS=Homo sapiens GN=SMN1 PE=1 SV=1 - [SMN_HUMAN]	31.8285	3.4	1	1	1	1					1	1
P17174	Aspartate aminotransferase, cytoplasmic OS=Homo sapiens GN=GOT1 PE=1 SV=3 - [AATC_HUMAN]	46.2185	3.39	1	1	1	1			1	1
P06493	Cyclin-dependent kinase 1 OS=Homo sapiens GN=CDK1 PE=1 SV=3 - [CDK1_HUMAN]	34.0739	3.37	1	1	1	1	1	1
Q15717	ELAV-like protein 1 OS=Homo sapiens GN=ELAVL1 PE=1 SV=2 - [ELAV1_HUMAN]	36.0692	3.37	1	1	1	3	1	1	1	1	1	1
P53396	ATP-citrate synthase OS=Homo sapiens GN=ACLY PE=1 SV=3 - [ACLY_HUMAN]	120.762	3.36	1	4	4	6	4	4	1	1	1	1
O43684	Mitotic checkpoint protein BUB3 OS=Homo sapiens GN=BUB3 PE=1 SV=1 - [BUB3_HUMAN]	37.1312	3.35	1	1	1	1			1	1
O00299	Chloride intracellular channel protein 1 OS=Homo sapiens GN=CLIC1 PE=1 SV=4 - [CLIC1_HUMAN]	26.9057	3.32	1	1	1	2	1	1	1	1
Q13243	Serine/arginine-rich splicing factor 5 OS=Homo sapiens GN=SRSF5 PE=1 SV=1 - [SRSF5_HUMAN]	31.2453	3.31	3	1	1	1			1	1
P26640	Valine--tRNA ligase OS=Homo sapiens GN=VARS PE=1 SV=4 - [SYVC_HUMAN]	140.387	3.24	1	3	3	3	3	3
O60664	Perilipin-3 OS=Homo sapiens GN=PLIN3 PE=1 SV=3 - [PLIN3_HUMAN]	47.0459	3.23	1	1	1	1	1	1
P62753	40S ribosomal protein S6 OS=Homo sapiens GN=RPS6 PE=1 SV=1 - [RS6_HUMAN]	28.663	3.21	1	1	1	2	1	1	1	1
Q5T750	Skin-specific protein 32 OS=Homo sapiens GN=XP32 PE=1 SV=1 - [XP32_HUMAN]	26.2193	3.2	1	1	1	1	1	1
P33316	Deoxyuridine 5'-triphosphate nucleotidohydrolase, mitochondrial OS=Homo sapiens GN=DUT PE=1 SV=4 - [DUT_HUMAN]	26.5466	3.17	1	1	1	1	1	1
Q9BPW8	Protein NipSnap homolog 1 OS=Homo sapiens GN=NIPSNAP1 PE=1 SV=1 - [NIPS1_HUMAN]	33.2888	3.17	1	1	1	1	1	1
O60884	DnaJ homolog subfamily A member 2 OS=Homo sapiens GN=DNAJA2 PE=1 SV=1 - [DNJA2_HUMAN]	45.7166	3.16	1	1	1	1	1	1
Q8N668	COMM domain-containing protein 1 OS=Homo sapiens GN=COMMD1 PE=1 SV=1 - [COMD1_HUMAN]	21.1649	3.16	1	1	1	1					1	1
O75323	Protein NipSnap homolog 2 OS=Homo sapiens GN=GBAS PE=1 SV=1 - [NIPS2_HUMAN]	33.7212	3.15	1	1	1	3	1	2	1	1
Q02878	60S ribosomal protein L6 OS=Homo sapiens GN=RPL6 PE=1 SV=3 - [RL6_HUMAN]	32.7076	3.13	1	1	1	4	1	2	1	1	1	1
Q9NZR1	Tropomodulin-2 OS=Homo sapiens GN=TMOD2 PE=1 SV=1 - [TMOD2_HUMAN]	39.5707	3.13	1	1	1	1			1	1
P24539	ATP synthase F(0) complex subunit B1, mitochondrial OS=Homo sapiens GN=ATP5F1 PE=1 SV=2 - [AT5F1_HUMAN]	28.8903	3.13	1	1	1	1	1	1
O94979	Protein transport protein Sec31A OS=Homo sapiens GN=SEC31A PE=1 SV=3 - [SC31A_HUMAN]	132.931	3.11	1	4	4	5	4	4	1	1
Q15181	Inorganic pyrophosphatase OS=Homo sapiens GN=PPA1 PE=1 SV=2 - [IPYR_HUMAN]	32.6392	3.11	1	1	1	2	1	1	1	1
P22234	Multifunctional protein ADE2 OS=Homo sapiens GN=PAICS PE=1 SV=3 - [PUR6_HUMAN]	47.0491	3.06	1	1	1	2	1	1	1	1
P62140	Serine/threonine-protein phosphatase PP1-beta catalytic subunit OS=Homo sapiens GN=PPP1CB PE=1 SV=3 - [PP1B_HUMAN]	37.1626	3.06	1	1	1	1	1	1
Q13011	Delta(3,5)-Delta(2,4)-dienoyl-CoA isomerase, mitochondrial OS=Homo sapiens GN=ECH1 PE=1 SV=2 - [ECH1_HUMAN]	35.7934	3.05	1	1	1	2	1	1	1	1
Q6UWP8	Suprabasin OS=Homo sapiens GN=SBSN PE=2 SV=2 - [SBSN_HUMAN]	60.5046	3.05	1	1	1	1	1	1
P25786	Proteasome subunit alpha type-1 OS=Homo sapiens GN=PSMA1 PE=1 SV=1 - [PSA1_HUMAN]	29.5369	3.04	1	1	1	1	1	1
P24752	Acetyl-CoA acetyltransferase, mitochondrial OS=Homo sapiens GN=ACAT1 PE=1 SV=1 - [THIL_HUMAN]	45.1706	3.04	1	1	1	3	1	1	1	1	1	1
P13716	Delta-aminolevulinic acid dehydratase OS=Homo sapiens GN=ALAD PE=1 SV=1 - [HEM2_HUMAN]	36.2714	3.03	1	1	1	1	1	1
P46940	Ras GTPase-activating-like protein IQGAP1 OS=Homo sapiens GN=IQGAP1 PE=1 SV=1 - [IQGA1_HUMAN]	189.134	3.02	3	5	5	8	5	6	2	2
P35998	26S protease regulatory subunit 7 OS=Homo sapiens GN=PSMC2 PE=1 SV=3 - [PRS7_HUMAN]	48.6031	3	1	1	1	1	1	1
O95831	Apoptosis-inducing factor 1, mitochondrial OS=Homo sapiens GN=AIFM1 PE=1 SV=1 - [AIFM1_HUMAN]	66.8589	2.94	1	2	2	4	1	1			2	3
Q14344	Guanine nucleotide-binding protein subunit alpha-13 OS=Homo sapiens GN=GNA13 PE=1 SV=2 - [GNA13_HUMAN]	44.0217	2.92	2	1	1	2	1	1			1	1
P30740	Leukocyte elastase inhibitor OS=Homo sapiens GN=SERPINB1 PE=1 SV=1 - [ILEU_HUMAN]	42.7147	2.9	1	1	1	3	1	1	1	1	1	1
P12277	Creatine kinase B-type OS=Homo sapiens GN=CKB PE=1 SV=1 - [KCRB_HUMAN]	42.6173	2.89	1	1	1	3	1	2	1	1
Q9Y265	RuvB-like 1 OS=Homo sapiens GN=RUVBL1 PE=1 SV=1 - [RUVB1_HUMAN]	50.1963	2.85	1	1	1	1	1	1
P11310	Medium-chain specific acyl-CoA dehydrogenase, mitochondrial OS=Homo sapiens GN=ACADM PE=1 SV=1 - [ACADM_HUMAN]	46.5586	2.85	1	1	1	1	1	1
Q9Y383	Putative RNA-binding protein Luc7-like 2 OS=Homo sapiens GN=LUC7L2 PE=1 SV=2 - [LC7L2_HUMAN]	46.4856	2.81	1	1	1	1					1	1
P51570	Galactokinase OS=Homo sapiens GN=GALK1 PE=1 SV=1 - [GALK1_HUMAN]	42.2456	2.81	1	1	1	1	1	1
Q99536	Synaptic vesicle membrane protein VAT-1 homolog OS=Homo sapiens GN=VAT1 PE=1 SV=2 - [VAT1_HUMAN]	41.8934	2.8	1	1	1	1			1	1
P17931	Galectin-3 OS=Homo sapiens GN=LGALS3 PE=1 SV=5 - [LEG3_HUMAN]	26.1361	2.8	1	1	1	1	1	1
P49327	Fatty acid synthase OS=Homo sapiens GN=FASN PE=1 SV=3 - [FAS_HUMAN]	273.254	2.79	1	6	6	7	6	7
O14745	Na(+)/H(+) exchange regulatory cofactor NHE-RF1 OS=Homo sapiens GN=SLC9A3R1 PE=1 SV=4 - [NHRF1_HUMAN]	38.8446	2.79	1	1	1	1	1	1
P30048	Thioredoxin-dependent peroxide reductase, mitochondrial OS=Homo sapiens GN=PRDX3 PE=1 SV=3 - [PRDX3_HUMAN]	27.6752	2.73	1	1	1	1	1	1
P62191	26S protease regulatory subunit 4 OS=Homo sapiens GN=PSMC1 PE=1 SV=1 - [PRS4_HUMAN]	49.1537	2.73	1	1	1	1	1	1
Q9Y266	Nuclear migration protein nudC OS=Homo sapiens GN=NUDC PE=1 SV=1 - [NUDC_HUMAN]	38.2191	2.72	1	1	1	1	1	1
Q9UN86	Ras GTPase-activating protein-binding protein 2 OS=Homo sapiens GN=G3BP2 PE=1 SV=2 - [G3BP2_HUMAN]	54.0878	2.7	1	1	1	1	1	1
Q9Y617	Phosphoserine aminotransferase OS=Homo sapiens GN=PSAT1 PE=1 SV=2 - [SERC_HUMAN]	40.3968	2.7	1	1	1	1	1	1
P12004	Proliferating cell nuclear antigen OS=Homo sapiens GN=PCNA PE=1 SV=1 - [PCNA_HUMAN]	28.7503	2.68	1	1	1	1	1	1
Q99733	Nucleosome assembly protein 1-like 4 OS=Homo sapiens GN=NAP1L4 PE=1 SV=1 - [NP1L4_HUMAN]	42.7969	2.67	1	1	1	1	1	1
P11279	Lysosome-associated membrane glycoprotein 1 OS=Homo sapiens GN=LAMP1 PE=1 SV=3 - [LAMP1_HUMAN]	44.8538	2.64	1	1	1	1	1	1
Q9BXS1	Isopentenyl-diphosphate delta-isomerase 2 OS=Homo sapiens GN=IDI2 PE=1 SV=1 - [IDI2_HUMAN]	26.7359	2.64	1	1	1	1	1	1
Q9NRN7	L-aminoadipate-semialdehyde dehydrogenase-phosphopantetheinyl transferase OS=Homo sapiens GN=AASDHPPT PE=1 SV=2 - [ADPPT_HUMAN]	35.7531	2.59	1	1	1	1			1	1
Q00839	Heterogeneous nuclear ribonucleoprotein U OS=Homo sapiens GN=HNRNPU PE=1 SV=6 - [HNRPU_HUMAN]	90.528	2.55	1	2	2	2	1	1			1	1
P15121	Aldose reductase OS=Homo sapiens GN=AKR1B1 PE=1 SV=3 - [ALDR_HUMAN]	35.8305	2.53	2	1	1	1	1	1
Q9BWD1	Acetyl-CoA acetyltransferase, cytosolic OS=Homo sapiens GN=ACAT2 PE=1 SV=2 - [THIC_HUMAN]	41.3244	2.52	1	1	1	2	1	1	1	1
P31930	Cytochrome b-c1 complex subunit 1, mitochondrial OS=Homo sapiens GN=UQCRC1 PE=1 SV=3 - [QCR1_HUMAN]	52.6124	2.5	1	1	1	1	1	1
P04040	Catalase OS=Homo sapiens GN=CAT PE=1 SV=3 - [CATA_HUMAN]	59.7188	2.47	1	1	1	2	1	2
P52292	Importin subunit alpha-1 OS=Homo sapiens GN=KPNA2 PE=1 SV=1 - [IMA1_HUMAN]	57.8259	2.46	1	1	1	1	1	1
Q9BT78	COP9 signalosome complex subunit 4 OS=Homo sapiens GN=COPS4 PE=1 SV=1 - [CSN4_HUMAN]	46.2397	2.46	1	1	1	1			1	1
Q96L46	Calpain small subunit 2 OS=Homo sapiens GN=CAPNS2 PE=2 SV=2 - [CPNS2_HUMAN]	27.6427	2.42	2	1	1	1	1	1
P30084	Enoyl-CoA hydratase, mitochondrial OS=Homo sapiens GN=ECHS1 PE=1 SV=4 - [ECHM_HUMAN]	31.3671	2.41	1	1	1	1	1	1
Q16610	Extracellular matrix protein 1 OS=Homo sapiens GN=ECM1 PE=1 SV=2 - [ECM1_HUMAN]	60.6353	2.41	1	1	1	1	1	1
P14324	Farnesyl pyrophosphate synthase OS=Homo sapiens GN=FDPS PE=1 SV=4 - [FPPS_HUMAN]	48.2446	2.39	1	1	1	1			1	1
P08195	4F2 cell-surface antigen heavy chain OS=Homo sapiens GN=SLC3A2 PE=1 SV=3 - [4F2_HUMAN]	67.9517	2.38	1	2	2	2	2	2
P08133	Annexin A6 OS=Homo sapiens GN=ANXA6 PE=1 SV=3 - [ANXA6_HUMAN]	75.8256	2.38	1	2	2	2	2	2
P22314	Ubiquitin-like modifier-activating enzyme 1 OS=Homo sapiens GN=UBA1 PE=1 SV=3 - [UBA1_HUMAN]	117.774	2.36	1	2	2	2	2	2
Q13283	Ras GTPase-activating protein-binding protein 1 OS=Homo sapiens GN=G3BP1 PE=1 SV=1 - [G3BP1_HUMAN]	52.1321	2.36	1	1	1	1	1	1
Q86YZ3	Hornerin OS=Homo sapiens GN=HRNR PE=1 SV=2 - [HORN_HUMAN]	282.228	2.35	1	2	2	3	2	3
P55083	Microfibril-associated glycoprotein 4 OS=Homo sapiens GN=MFAP4 PE=1 SV=2 - [MFAP4_HUMAN]	28.6299	2.35	1	1	1	1	1	1
P35613	Basigin OS=Homo sapiens GN=BSG PE=1 SV=2 - [BASI_HUMAN]	42.1741	2.34	1	1	1	2	1	2
O00148	ATP-dependent RNA helicase DDX39A OS=Homo sapiens GN=DDX39A PE=1 SV=2 - [DX39A_HUMAN]	49.098	2.34	2	1	1	1			1	1
Q9NVA2	Septin-11 OS=Homo sapiens GN=SEPT11 PE=1 SV=3 - [SEP11_HUMAN]	49.3672	2.33	1	1	1	1	1	1
P54578	Ubiquitin carboxyl-terminal hydrolase 14 OS=Homo sapiens GN=USP14 PE=1 SV=3 - [UBP14_HUMAN]	56.033	2.23	1	1	1	1	1	1
O00232	26S proteasome non-ATPase regulatory subunit 12 OS=Homo sapiens GN=PSMD12 PE=1 SV=3 - [PSD12_HUMAN]	52.8706	2.19	1	1	1	1			1	1
Q9Y285	Phenylalanine--tRNA ligase alpha subunit OS=Homo sapiens GN=FARSA PE=1 SV=3 - [SYFA_HUMAN]	57.5275	2.17	1	1	1	1	1	1
P43686	26S protease regulatory subunit 6B OS=Homo sapiens GN=PSMC4 PE=1 SV=2 - [PRS6B_HUMAN]	47.3365	2.15	1	1	1	1	1	1
P48444	Coatomer subunit delta OS=Homo sapiens GN=ARCN1 PE=1 SV=1 - [COPD_HUMAN]	57.1741	2.15	1	1	1	1	1	1
P05023	Sodium/potassium-transporting ATPase subunit alpha-1 OS=Homo sapiens GN=ATP1A1 PE=1 SV=1 - [AT1A1_HUMAN]	112.824	2.15	5	2	2	2	2	2
P47712	Cytosolic phospholipase A2 OS=Homo sapiens GN=PLA2G4A PE=1 SV=2 - [PA24A_HUMAN]	85.1842	2.14	1	2	2	2	2	2
P55809	Succinyl-CoA:3-ketoacid coenzyme A transferase 1, mitochondrial OS=Homo sapiens GN=OXCT1 PE=1 SV=1 - [SCOT1_HUMAN]	56.1219	2.12	1	1	1	1	1	1
Q14697	Neutral alpha-glucosidase AB OS=Homo sapiens GN=GANAB PE=1 SV=3 - [GANAB_HUMAN]	106.807	2.12	1	2	2	2	2	2
Q8NBS9	Thioredoxin domain-containing protein 5 OS=Homo sapiens GN=TXNDC5 PE=1 SV=2 - [TXND5_HUMAN]	47.5987	2.08	1	1	1	1			1	1
Q9BQA1	Methylosome protein 50 OS=Homo sapiens GN=WDR77 PE=1 SV=1 - [MEP50_HUMAN]	36.7011	2.05	1	1	1	1	1	1
Q00610	Clathrin heavy chain 1 OS=Homo sapiens GN=CLTC PE=1 SV=5 - [CLH1_HUMAN]	191.493	2.03	1	3	3	5	3	3	1	1	1	1
P04843	Dolichyl-diphosphooligosaccharide--protein glycosyltransferase subunit 1 OS=Homo sapiens GN=RPN1 PE=1 SV=1 - [RPN1_HUMAN]	68.5268	1.98	1	1	1	2	1	2
Q9UMS4	Pre-mRNA-processing factor 19 OS=Homo sapiens GN=PRPF19 PE=1 SV=1 - [PRP19_HUMAN]	55.1463	1.98	1	1	1	1	1	1
P06239	Tyrosine-protein kinase Lck OS=Homo sapiens GN=LCK PE=1 SV=6 - [LCK_HUMAN]	57.9639	1.96	3	1	1	1	1	1
P11413	Glucose-6-phosphate 1-dehydrogenase OS=Homo sapiens GN=G6PD PE=1 SV=4 - [G6PD_HUMAN]	59.219	1.94	1	1	1	1	1	1
Q15019	Septin-2 OS=Homo sapiens GN=SEPT2 PE=1 SV=1 - [SEPT2_HUMAN]	41.4613	1.94	1	1	1	1	1	1
O00231	26S proteasome non-ATPase regulatory subunit 11 OS=Homo sapiens GN=PSMD11 PE=1 SV=3 - [PSD11_HUMAN]	47.434	1.9	1	1	1	1	1	1
P55084	Trifunctional enzyme subunit beta, mitochondrial OS=Homo sapiens GN=HADHB PE=1 SV=3 - [ECHB_HUMAN]	51.2615	1.9	1	1	1	1	1	1
Q86UE4	Protein LYRIC OS=Homo sapiens GN=MTDH PE=1 SV=2 - [LYRIC_HUMAN]	63.7988	1.89	1	1	1	1	1	1
P49915	GMP synthase [glutamine-hydrolyzing] OS=Homo sapiens GN=GMPS PE=1 SV=1 - [GUAA_HUMAN]	76.667	1.88	1	1	1	1	1	1
Q09028	Histone-binding protein RBBP4 OS=Homo sapiens GN=RBBP4 PE=1 SV=3 - [RBBP4_HUMAN]	47.6261	1.88	2	1	1	1					1	1
P31939	Bifunctional purine biosynthesis protein PURH OS=Homo sapiens GN=ATIC PE=1 SV=3 - [PUR9_HUMAN]	64.5753	1.86	1	1	1	1	1	1
Q96L92	Sorting nexin-27 OS=Homo sapiens GN=SNX27 PE=1 SV=2 - [SNX27_HUMAN]	61.2265	1.85	1	1	1	1	1	1
P42357	Histidine ammonia-lyase OS=Homo sapiens GN=HAL PE=1 SV=1 - [HUTH_HUMAN]	72.6518	1.83	1	1	1	1	1	1
A8MXT2	Melanoma-associated antigen B17 OS=Homo sapiens GN=MAGEB17 PE=4 SV=3 - [MAGBH_HUMAN]	37.555	1.79	1	1	1	1	1	1
Q16851	UTP--glucose-1-phosphate uridylyltransferase OS=Homo sapiens GN=UGP2 PE=1 SV=5 - [UGPA_HUMAN]	56.9047	1.77	1	1	1	1	1	1
Q9NVI7	ATPase family AAA domain-containing protein 3A OS=Homo sapiens GN=ATAD3A PE=1 SV=2 - [ATD3A_HUMAN]	71.3247	1.74	2	1	1	2	1	2
Q9NZI8	Insulin-like growth factor 2 mRNA-binding protein 1 OS=Homo sapiens GN=IGF2BP1 PE=1 SV=2 - [IF2B1_HUMAN]	63.4412	1.73	2	1	1	1	1	1
P62195	26S protease regulatory subunit 8 OS=Homo sapiens GN=PSMC5 PE=1 SV=1 - [PRS8_HUMAN]	45.5971	1.72	1	1	1	1			1	1
Q9BY44	Eukaryotic translation initiation factor 2A OS=Homo sapiens GN=EIF2A PE=1 SV=3 - [EIF2A_HUMAN]	64.9492	1.71	1	1	1	1	1	1
P00966	Argininosuccinate synthase OS=Homo sapiens GN=ASS1 PE=1 SV=2 - [ASSY_HUMAN]	46.501	1.7	1	1	1	3	1	2			1	1
O43242	26S proteasome non-ATPase regulatory subunit 3 OS=Homo sapiens GN=PSMD3 PE=1 SV=2 - [PSMD3_HUMAN]	60.9395	1.69	1	1	1	1	1	1
Q09666	Neuroblast differentiation-associated protein AHNAK OS=Homo sapiens GN=AHNAK PE=1 SV=2 - [AHNK_HUMAN]	628.699	1.68	1	3	3	4					3	4
O95394	Phosphoacetylglucosamine mutase OS=Homo sapiens GN=PGM3 PE=1 SV=1 - [AGM1_HUMAN]	59.8143	1.66	1	1	1	1	1	1
P30154	Serine/threonine-protein phosphatase 2A 65 kDa regulatory subunit A beta isoform OS=Homo sapiens GN=PPP2R1B PE=1 SV=3 - [2AAB_HUMAN]	66.1715	1.66	1	1	1	1	1	1
Q6L8Q7	2',5'-phosphodiesterase 12 OS=Homo sapiens GN=PDE12 PE=1 SV=2 - [PDE12_HUMAN]	67.3089	1.64	1	1	1	1	1	1
Q9Y3I0	tRNA-splicing ligase RtcB homolog OS=Homo sapiens GN=RTCB PE=1 SV=1 - [RTCB_HUMAN]	55.1749	1.58	1	1	1	1			1	1
P48163	NADP-dependent malic enzyme OS=Homo sapiens GN=ME1 PE=1 SV=1 - [MAOX_HUMAN]	64.1091	1.57	1	1	1	1	1	1
Q5T749	Keratinocyte proline-rich protein OS=Homo sapiens GN=KPRP PE=1 SV=1 - [KPRP_HUMAN]	64.0932	1.55	1	2	2	2	2	2
P34932	Heat shock 70 kDa protein 4 OS=Homo sapiens GN=HSPA4 PE=1 SV=4 - [HSP74_HUMAN]	94.2712	1.55	1	1	1	1	1	1
O43865	Putative adenosylhomocysteinase 2 OS=Homo sapiens GN=AHCYL1 PE=1 SV=2 - [SAHH2_HUMAN]	58.9134	1.51	2	1	1	1	1	1
P41250	Glycine--tRNA ligase OS=Homo sapiens GN=GARS PE=1 SV=3 - [SYG_HUMAN]	83.1126	1.49	1	1	1	1	1	1
P55072	Transitional endoplasmic reticulum ATPase OS=Homo sapiens GN=VCP PE=1 SV=4 - [TERA_HUMAN]	89.2657	1.49	1	1	1	1	1	1
P35580	Myosin-10 OS=Homo sapiens GN=MYH10 PE=1 SV=3 - [MYH10_HUMAN]	228.858	1.42	1	2	3	5	1	1	2	2	2	2
P07384	Calpain-1 catalytic subunit OS=Homo sapiens GN=CAPN1 PE=1 SV=1 - [CAN1_HUMAN]	81.8382	1.4	1	1	1	1	1	1
Q5TID7	Coiled-coil domain-containing protein 181 OS=Homo sapiens GN=CCDC181 PE=2 SV=1 - [CC181_HUMAN]	60.0661	1.38	1	1	1	1	1	1
P13010	X-ray repair cross-complementing protein 5 OS=Homo sapiens GN=XRCC5 PE=1 SV=3 - [XRCC5_HUMAN]	82.6523	1.37	1	1	1	1	1	1
Q14974	Importin subunit beta-1 OS=Homo sapiens GN=KPNB1 PE=1 SV=2 - [IMB1_HUMAN]	97.108	1.37	1	1	1	1	1	1
P54136	Arginine--tRNA ligase, cytoplasmic OS=Homo sapiens GN=RARS PE=1 SV=2 - [SYRC_HUMAN]	75.3309	1.36	1	1	1	1	1	1
Q08211	ATP-dependent RNA helicase A OS=Homo sapiens GN=DHX9 PE=1 SV=4 - [DHX9_HUMAN]	140.869	1.34	1	2	2	2	2	2
P09327	Villin-1 OS=Homo sapiens GN=VIL1 PE=1 SV=4 - [VILI_HUMAN]	92.6367	1.33	1	1	1	1					1	1
Q13200	26S proteasome non-ATPase regulatory subunit 2 OS=Homo sapiens GN=PSMD2 PE=1 SV=3 - [PSMD2_HUMAN]	100.136	1.32	1	1	1	1	1	1
O95757	Heat shock 70 kDa protein 4L OS=Homo sapiens GN=HSPA4L PE=1 SV=3 - [HS74L_HUMAN]	94.4525	1.31	1	1	1	1	1	1
Q9Y4B5	Microtubule cross-linking factor 1 OS=Homo sapiens GN=MTCL1 PE=1 SV=5 - [MTCL1_HUMAN]	209.397	1.31	1	2	2	3	1	1	2	2
P27816	Microtubule-associated protein 4 OS=Homo sapiens GN=MAP4 PE=1 SV=3 - [MAP4_HUMAN]	120.93	1.3	1	1	1	1	1	1
Q15149	Plectin OS=Homo sapiens GN=PLEC PE=1 SV=3 - [PLEC_HUMAN]	531.466	1.3	1	4	6	7	4	4			3	3
O43143	Putative pre-mRNA-splicing factor ATP-dependent RNA helicase DHX15 OS=Homo sapiens GN=DHX15 PE=1 SV=2 - [DHX15_HUMAN]	90.8752	1.26	1	1	1	1	1	1
Q04637	Eukaryotic translation initiation factor 4 gamma 1 OS=Homo sapiens GN=EIF4G1 PE=1 SV=4 - [IF4G1_HUMAN]	175.382	1.25	1	2	2	2	2	2
Q14566	DNA replication licensing factor MCM6 OS=Homo sapiens GN=MCM6 PE=1 SV=1 - [MCM6_HUMAN]	92.8312	1.22	1	1	1	1	1	1
Q96RP9	Elongation factor G, mitochondrial OS=Homo sapiens GN=GFM1 PE=1 SV=2 - [EFGM_HUMAN]	83.4184	1.2	1	1	1	1	1	1
Q9HBL0	Tensin-1 OS=Homo sapiens GN=TNS1 PE=1 SV=2 - [TENS1_HUMAN]	185.586	1.15	1	2	2	3	2	2	1	1
P49588	Alanine--tRNA ligase, cytoplasmic OS=Homo sapiens GN=AARS PE=1 SV=2 - [SYAC_HUMAN]	106.743	1.14	1	1	1	1	1	1
Q9Y4W6	AFG3-like protein 2 OS=Homo sapiens GN=AFG3L2 PE=1 SV=2 - [AFG32_HUMAN]	88.5282	1.13	1	1	1	1	1	1
Q99459	Cell division cycle 5-like protein OS=Homo sapiens GN=CDC5L PE=1 SV=2 - [CDC5L_HUMAN]	92.1937	1.12	1	1	1	1			1	1
P21333	Filamin-A OS=Homo sapiens GN=FLNA PE=1 SV=4 - [FLNA_HUMAN]	280.564	1.1	1	2	2	2	2	2
P22735	Protein-glutamine gamma-glutamyltransferase K OS=Homo sapiens GN=TGM1 PE=1 SV=4 - [TGM1_HUMAN]	89.7303	1.1	1	1	1	1	1	1
P01130	Low-density lipoprotein receptor OS=Homo sapiens GN=LDLR PE=1 SV=1 - [LDLR_HUMAN]	95.3136	1.05	1	1	1	1	1	1
Q01813	ATP-dependent 6-phosphofructokinase, platelet type OS=Homo sapiens GN=PFKP PE=1 SV=2 - [PFKAP_HUMAN]	85.5415	1.02	1	1	1	1	1	1
Q14574	Desmocollin-3 OS=Homo sapiens GN=DSC3 PE=1 SV=3 - [DSC3_HUMAN]	99.9063	1	1	1	1	2	1	2
P25205	DNA replication licensing factor MCM3 OS=Homo sapiens GN=MCM3 PE=1 SV=3 - [MCM3_HUMAN]	90.924	0.99	1	1	1	1	1	1
P78344	Eukaryotic translation initiation factor 4 gamma 2 OS=Homo sapiens GN=EIF4G2 PE=1 SV=1 - [IF4G2_HUMAN]	102.297	0.99	1	1	1	1	1	1
P35606	Coatomer subunit beta' OS=Homo sapiens GN=COPB2 PE=1 SV=2 - [COPB2_HUMAN]	102.422	0.99	1	1	1	1	1	1
P36776	Lon protease homolog, mitochondrial OS=Homo sapiens GN=LONP1 PE=1 SV=2 - [LONM_HUMAN]	106.422	0.94	1	1	1	1	1	1
P78527	DNA-dependent protein kinase catalytic subunit OS=Homo sapiens GN=PRKDC PE=1 SV=3 - [PRKDC_HUMAN]	468.788	0.92	1	4	4	4	4	4
Q16720	Plasma membrane calcium-transporting ATPase 3 OS=Homo sapiens GN=ATP2B3 PE=1 SV=3 - [AT2B3_HUMAN]	134.112	0.9	4	1	1	1	1	1
Q9Y4L1	Hypoxia up-regulated protein 1 OS=Homo sapiens GN=HYOU1 PE=1 SV=1 - [HYOU1_HUMAN]	111.266	0.9	1	1	1	1	1	1
P53621	Coatomer subunit alpha OS=Homo sapiens GN=COPA PE=1 SV=2 - [COPA_HUMAN]	138.258	0.9	1	1	1	1	1	1
O95373	Importin-7 OS=Homo sapiens GN=IPO7 PE=1 SV=1 - [IPO7_HUMAN]	119.44	0.87	1	1	1	1	1	1
O00159	Unconventional myosin-Ic OS=Homo sapiens GN=MYO1C PE=1 SV=4 - [MYO1C_HUMAN]	121.606	0.85	1	1	1	2	1	1	1	1
Q8WWM7	Ataxin-2-like protein OS=Homo sapiens GN=ATXN2L PE=1 SV=2 - [ATX2L_HUMAN]	113.304	0.84	1	1	1	1	1	1
P55060	Exportin-2 OS=Homo sapiens GN=CSE1L PE=1 SV=3 - [XPO2_HUMAN]	110.346	0.82	1	1	1	2	1	1			1	1
P42704	Leucine-rich PPR motif-containing protein, mitochondrial OS=Homo sapiens GN=LRPPRC PE=1 SV=3 - [LPPRC_HUMAN]	157.805	0.79	1	1	1	2	1	2
P01024	Complement C3 OS=Homo sapiens GN=C3 PE=1 SV=2 - [CO3_HUMAN]	187.03	0.72	1	1	1	1					1	1
O75153	Clustered mitochondria protein homolog OS=Homo sapiens GN=CLUH PE=1 SV=2 - [CLU_HUMAN]	146.577	0.69	1	1	1	1	1	1
Q9Y520	Protein PRRC2C OS=Homo sapiens GN=PRRC2C PE=1 SV=4 - [PRC2C_HUMAN]	316.718	0.62	2	1	2	2			2	2
P07814	Bifunctional glutamate/proline--tRNA ligase OS=Homo sapiens GN=EPRS PE=1 SV=5 - [SYEP_HUMAN]	170.483	0.6	1	1	1	1	1	1
O15067	Phosphoribosylformylglycinamidine synthase OS=Homo sapiens GN=PFAS PE=1 SV=4 - [PUR4_HUMAN]	144.643	0.6	1	1	1	1	1	1
Q9H2G2	STE20-like serine/threonine-protein kinase OS=Homo sapiens GN=SLK PE=1 SV=1 - [SLK_HUMAN]	142.607	0.57	1	1	1	10	1	3	1	3	1	4
Q7Z406	Myosin-14 OS=Homo sapiens GN=MYH14 PE=1 SV=2 - [MYH14_HUMAN]	227.732	0.5	1	1	1	1	1	1
Q92616	Translational activator GCN1 OS=Homo sapiens GN=GCN1L1 PE=1 SV=6 - [GCN1L_HUMAN]	292.572	0.49	1	1	1	1	1	1
P20930	Filaggrin OS=Homo sapiens GN=FLG PE=1 SV=3 - [FILA_HUMAN]	434.922	0.44	1	2	2	2	2	2
Q6P2Q9	Pre-mRNA-processing-splicing factor 8 OS=Homo sapiens GN=PRPF8 PE=1 SV=2 - [PRP8_HUMAN]	273.427	0.43	1	1	1	1	1	1
Q14204	Cytoplasmic dynein 1 heavy chain 1 OS=Homo sapiens GN=DYNC1H1 PE=1 SV=5 - [DYHC1_HUMAN]	532.072	0.41	1	2	2	2	2	2
Q7Z407	CUB and sushi domain-containing protein 3 OS=Homo sapiens GN=CSMD3 PE=2 SV=3 - [CSMD3_HUMAN]	405.739	0.4	1	1	1	4					1	4
Q92817	Envoplakin OS=Homo sapiens GN=EVPL PE=1 SV=3 - [EVPL_HUMAN]	231.463	0.39	1	1	1	1					1	1
Q9Y490	Talin-1 OS=Homo sapiens GN=TLN1 PE=1 SV=3 - [TLN1_HUMAN]	269.599	0.35	1	1	1	1	1	1
O95071	E3 ubiquitin-protein ligase UBR5 OS=Homo sapiens GN=UBR5 PE=1 SV=2 - [UBR5_HUMAN]	309.158	0.32	1	1	1	1	1	1
Q14789	Golgin subfamily B member 1 OS=Homo sapiens GN=GOLGB1 PE=1 SV=2 - [GOGB1_HUMAN]	375.79	0.28	1	1	1	1	1	1
Q6ZR08	Dynein heavy chain 12, axonemal OS=Homo sapiens GN=DNAH12 PE=2 SV=2 - [DYH12_HUMAN]	356.713	0.26	1	1	1	3	1	2	1	1
